# Supplementary material for: Stimulation of ipt overexpression as a tool to elucidate the role of cytokinins in high temperature responses of Arabidopsis thaliana
Source: PubMed Central journal article supplement (PMC4861028; doi:10.1093/jxb/erw129), 2016-04-05

## Journal of Experimental Botany

### Stimulation of *ipt*-overexpression as a tool for elucidation of cytokinin role in temperature responses of *Arabidopsis thaliana*

Running title: The impact of cytokinin over-expression on heat stress responses

Jan Skalák, Martin Černý, Petr Jedelský, Jana Dobrá, Eva Ge, Jan Novák, Marie Hronková, Radomira Vanková, Břetislav Brzobohatý

#### Supplementary data

**Table S1.** Primers used in q RT PCR.

Sequences start at 5' end.

| <i>Gene Product</i>                            | <i>Abbr.</i>  | <i>Locus</i> | <i>Primer</i>      | <i>Sequence</i>             | <i>Anneal. Temp.</i>    | <i>UPL Probe No.</i> |
|------------------------------------------------|---------------|--------------|--------------------|-----------------------------|-------------------------|----------------------|
| Heat shock transcription factor A2             | <i>HsfA2</i>  | At2g26150    | <b>At HsfA2 L</b>  | TTTGTGGTGTGGGATTCTCAT       | <b>60<sup>0</sup> C</b> | #12                  |
|                                                |               |              | <b>At HsfA2 R</b>  | CCTTTATAGCTGAAGACTCATAGGAAA |                         |                      |
| Heat-stress-associated 32-kD protein           | <i>HSA32</i>  | At4g21320    | <b>At HSA32 L</b>  | TGCTTCGTAGTGGTCCTTCA        | <b>60<sup>0</sup> C</b> | #25                  |
|                                                |               |              | <b>At HSA32 R</b>  | TGTCAAACCCCAACTGCTTA        |                         |                      |
| Dehydration-responsive element binding protein | <i>DREB2B</i> | At3g11020    | <b>At DREB2B L</b> | GCCAAGTTTTGCAGGAGAAA        | <b>58<sup>0</sup> C</b> | #35                  |
|                                                |               |              | <b>At DREB2B R</b> | CTGTTGCTGTTCTGTTGCT         |                         |                      |
| Isopentenyl transferase 1                      | <i>IPT1</i>   | At1g68460    | <b>fAtIPT1</b>     | ACTCAACTTCCACCTCC           | <b>60<sup>0</sup> C</b> | -                    |
|                                                |               |              | <b>rAtIPT1</b>     | ATTCCGTGACCGTGACT           |                         |                      |
| Isopentenyl transferase 3                      | <i>IPT3</i>   | At3g63110    | <b>fAtIPT3</b>     | TTTTTCAGGAACGAGCAGT         | <b>60<sup>0</sup> C</b> | -                    |

|                                       |             |           |                  |                           |              |     |
|---------------------------------------|-------------|-----------|------------------|---------------------------|--------------|-----|
|                                       |             |           | <b>rAtIPT3</b>   | TTGGACCTTCGCTTTGTA        |              |     |
| Isopentenyl transferase 5             | <i>IPT5</i> | At5g19040 | <b>fAtIPT5</b>   | ACTTGTTTGCTTGCGTGT A      | <b>60° C</b> | -   |
|                                       |             |           | <b>rAtIPT5</b>   | CCTTCTTTCGTCATCGTC        |              |     |
| Isopentenyl transferase 7             | <i>IPT7</i> | At3g23630 | <b>fAtIPT7</b>   | CCG TGC CAC AAA AAG TAA A | <b>58° C</b> | -   |
|                                       |             |           | <b>rAtIPT7</b>   | AAC AGT GCT CAA CAT CAT C |              |     |
| Cytokinin oxidase/<br>dehydrogenase 1 | <i>CKX1</i> | At2g41510 | <b>fCKX1-510</b> | CACCTTTGGCAATTCTACAT      | <b>60° C</b> | -   |
|                                       |             |           | <b>rCKX1-510</b> | TGT CCT TGA AGC GAG TGA   |              |     |
| Cytokinin oxidase/<br>dehydrogenase 3 | <i>CKX3</i> | At5g56970 | <b>fCKX3-509</b> | GCTGCGTGGCTATGGA          | <b>60° C</b> | -   |
|                                       |             |           | <b>rCKX3-509</b> | TGTGGACCGTACCGAAAC        |              |     |
| Cytokinin oxidase/<br>dehydrogenase 5 | <i>CKX5</i> | At5g21482 | <b>fCKX5-513</b> | GTCAGAAGAACGAGTCAT        | <b>60° C</b> | -   |
|                                       |             |           | <b>rCKX5-513</b> | CGCAAGATTGTGGTAGT         |              |     |
| Cytokinin oxidase/<br>dehydrogenase 6 | <i>CKX6</i> | At1g75450 | <b>fCKX6-515</b> | GAC GCC CAA GCC ACT       | <b>60° C</b> | -   |
|                                       |             |           | <b>rCKX6-515</b> | TAACTCTCCACCCCATAC        |              |     |
| Arabidopsis histidine<br>kinase 2     | <i>AHK2</i> | At5g35750 | <b>At AHK2 L</b> | AAGAACAGCGTGTTGAAGCA      | <b>58° C</b> | #22 |
|                                       |             |           | <b>At AHK2 R</b> | GTTTGCTGGCAAGTTGGTG       |              |     |
| Arabidopsis histidine<br>kinase 3     | <i>AHK3</i> | At1g27320 | <b>At AHK3 L</b> | CAGATGTTGCAAAGTCACAGTTC   | <b>58° C</b> | #59 |
|                                       |             |           | <b>At AHK3 R</b> | CCATAAGCATATGCAACATTCC    |              |     |

|                                   |              |           |                   |                            |             |     |
|-----------------------------------|--------------|-----------|-------------------|----------------------------|-------------|-----|
| Arabidopsis histidine kinase 4    | <i>AHK4</i>  | At2g01830 | <b>At AHK4 L</b>  | ATTGAGCGGTTACGAAGCTG       | <b>60°C</b> | #33 |
|                                   |              |           | <b>At AHK4 R</b>  | GCTCCTCAGAGACCAAATGC       |             |     |
| Arabidopsis response regulator 8  | <i>ARR8</i>  | At2g41310 | <b>At ARR8 L</b>  | ACGTTCTGCAAGAATCTCC        | <b>60°C</b> | #17 |
|                                   |              |           | <b>At ARR8 R</b>  | GGTTTCAACTTGGTAAGATCAGC    |             |     |
| Arabidopsis response regulator 9  | <i>ARR9</i>  | At3g57040 | <b>At ARR9 L</b>  | CGACCCAAATGCGTTTTTC        | <b>58°C</b> | #65 |
|                                   |              |           | <b>At ARR9 R</b>  | CTTGAGCAAATCATAACCAGTCA    |             |     |
| Arabidopsis response regulator 10 | <i>ARR10</i> | At4g31920 | <b>At ARR10 L</b> | GCTTCTGATGCTGGTTCCTT       | <b>60°C</b> | #21 |
|                                   |              |           | <b>At ARR10 R</b> | CAATCACCTTCCGAGAAATCA      |             |     |
| Arabidopsis response regulator 12 | <i>ARR12</i> | At2g25180 | <b>At ARR12 L</b> | CTCCACGATGAAGCAGGAA        | <b>58°C</b> | #25 |
|                                   |              |           | <b>At ARR12 R</b> | GAGTGAACTAAACCCTCCATATCC   |             |     |
| Zeaxanthin epoxidase              | <i>ABA1</i>  | At5g67030 | <b>At ABA1 L</b>  | ACAGTACTTTGTTTCTTCGGATGTT  | <b>60°C</b> | #31 |
|                                   |              |           | <b>At ABA1 R</b>  | TCAAACAACCTTTTCTTCATACCA   |             |     |
| ABA insensitive 1                 | <i>ABI1</i>  | At4g26080 | <b>At ABI1 L</b>  | TCGACTATACCAAGATTCCTTCAA   | <b>60°C</b> | #6  |
|                                   |              |           | <b>At ABI1 R</b>  | GCCAAATGCATCCTCTCTCT       |             |     |
| ABA insensitive 2                 | <i>ABI2</i>  | At5g57050 | <b>At ABI2 L</b>  | TTCAGAATCTCTAAATGGCTGAAAC  | <b>60°C</b> | #61 |
|                                   |              |           | <b>At ABI2 R</b>  | AAAAGGACTAAAATCAGAGTTTCCTG |             |     |
| ABA insensitive 5                 | <i>ABI5</i>  | At2g36270 | <b>At ABI5 L</b>  | CAAGAAGCGGATTCTCTCAGTT     | <b>60°C</b> | #70 |

|                                              |                 |           |                      |                            |             |     |
|----------------------------------------------|-----------------|-----------|----------------------|----------------------------|-------------|-----|
|                                              |                 |           | <b>At ABI5 R</b>     | TCAACTTCGTTTCTCTAGTTACCATT |             |     |
| ABA insensitive 8                            | <i>ABI8</i>     | At3g08550 | <b>At ABI8 L</b>     | GCATAATTACATGAAAACCTCCAAT  | <b>60°C</b> | #25 |
|                                              |                 |           | <b>At ABI8 R</b>     | CGCCTGGATGTTAAGTCAGAA      |             |     |
| Aldehyde oxidase 2                           | <i>AAO2</i>     | At3g43600 | <b>At AAO2 L</b>     | TTCTTTCAAGAGTGTCAAGCTCA    | <b>60°C</b> | #88 |
|                                              |                 |           | <b>At AAO2 R</b>     | AAGACAGGATCGAACTTGGAGA     |             |     |
| 9- <i>cis</i> -epoxycarotenoid dioxigenase 3 | <i>NCED3</i>    | At3g14440 | <b>At NCED3 L</b>    | TCGTCGTGATAGGGTCCTG        | <b>60°C</b> | #22 |
|                                              |                 |           | <b>At NCED3 R</b>    | TTCTCGTCAGACTCGTTGAAAA     |             |     |
| ABA 8'-hydroxylase                           | <i>CYP707A3</i> | At5g45340 | <b>At CYP707A3 L</b> | CGATTTATCGCCGGAGTC         | <b>60°C</b> | #25 |
|                                              |                 |           | <b>At CYP707A3 R</b> | CGTAAGGATAACCCATTGTTCC     |             |     |
| UDP-glucosyl transferase 71B6                | <i>UGT71B6</i>  | At3g21780 | <b>At UGT71B6 L</b>  | CTCCCAGAAGGGTTTTTCG        | <b>60°C</b> | #6  |
|                                              |                 |           | <b>At UGT71B6 R</b>  | TGTTTCAGCCCATCCGATAAC      |             |     |
| UDP-glucosyl transferase 75B1                | <i>UGT75B1</i>  | At1g05560 | <b>At UGT75B1 L</b>  | TGGAAGACTGGTGTGAGGGTA      | <b>60°C</b> | #22 |
|                                              |                 |           | <b>At UGT75B1 R</b>  | TTCCAAACACCTCCTGATCTC      |             |     |
| UDP-glucosyl transferase 75B2                | <i>UGT75B2</i>  | At1g05530 | <b>At UGT75B2 L</b>  | AGAAATGGTGGCAGTTGGTC       | <b>60°C</b> | #4  |
|                                              |                 |           | <b>At UGT75B2 R</b>  | CCTGATTCGCTTCCAGTGA        |             |     |
| Homeobox protein 6                           | <i>ATHB6</i>    | At2g22430 | <b>At ATHB6 L</b>    | CCGTGACAATGAATCTCTCTCT     | <b>60°C</b> | #25 |
|                                              |                 |           | <b>At ATHB6 R</b>    | GCCGCGTTGTTCTCTCTT         |             |     |

|                                                                                                            |                        |           |                    |                          |             |     |
|------------------------------------------------------------------------------------------------------------|------------------------|-----------|--------------------|--------------------------|-------------|-----|
| Abscisic acid responsive elements-binding factor 2/<br>Abscisic acid responsive elements-binding protein 2 | <i>ABF2/<br/>AREB1</i> | At1g45249 | <b>At ABF2 L</b>   | GCACACGAATTTAGCAAAAAGA   | <b>60°C</b> | #38 |
|                                                                                                            |                        |           | <b>At ABF2 R</b>   | CATCTCCTGGTGGCTCATTC     |             |     |
| Accelerated cell death                                                                                     | <i>ACD2</i>            | At4g37000 | <b>At ACD2 L</b>   | GTCGACGGTGGAGAATCG       | <b>60°C</b> | #12 |
|                                                                                                            |                        |           | <b>At ACD2 R</b>   | CGTACATCTGGAGGGAGGTT     |             |     |
| Early responsive to dehydration 15                                                                         | <i>ERD15</i>           | At2g41430 | <b>At ERD15 L</b>  | TGGTTTCTATGACAACGGAGAG   | <b>60°C</b> | #22 |
|                                                                                                            |                        |           | <b>At ERD15 R</b>  | TGGAAGAAGATCAGCTACATCG   |             |     |
| Auxin-induced protein,<br>putative                                                                         | <i>ATB2</i>            | At1g60710 | <b>At ATB2 L</b>   | TCGATACTCGTGTCCCTATCG    | <b>58°C</b> | #13 |
|                                                                                                            |                        |           | <b>At ATB2 R</b>   | AACAGCATGTGCTCTTCTGATAGT |             |     |
| Nitrilase 1<br>(indole-3-acetonitrile nitrile hydratase / indole-3-acetonitrile nitrilase)                 | <i>NIT1</i>            | At3g44310 | <b>At NIT1 L</b>   | TGAGTTTCGGAAGTACCATGC    | <b>58°C</b> | #72 |
|                                                                                                            |                        |           | <b>At NIT1 R</b>   | CACGTCAGCCAATCTTGCTA     |             |     |
| Malate dehydrogenase,<br>cytoplasmic 1                                                                     | <i>MDcyt1</i>          | At1g04410 | <b>At MDcyt1 L</b> | ACAGCGTTCCATCAGGACTT     | <b>58°C</b> | #12 |
|                                                                                                            |                        |           | <b>At MDcyt1 R</b> | TGATACTTCATCAATCGGAAGG   |             |     |
| Ribosomal protein S1                                                                                       | <i>RPS1</i>            | At5g30510 | <b>At RPS1 L</b>   | CCTGGTGACACTTTGAAGGTT    | <b>60°C</b> | #78 |
|                                                                                                            |                        |           | <b>At RPS1 R</b>   | TGGGTTACGAATCATATCACCAG  |             |     |
| Elongation factor Tu,<br>chloroplastic                                                                     | <i>RABE1b</i>          | At4g20360 | <b>At RABE1b L</b> | TGCTATCAGAGAAGGAGGAAAGA  | <b>60°C</b> | #67 |

|                                                                     |               |           |                    |                           |             |     |
|---------------------------------------------------------------------|---------------|-----------|--------------------|---------------------------|-------------|-----|
|                                                                     |               |           | <b>At RAB1b R</b>  | AACCTTATAATCATTTCGAGGATCG |             |     |
| Chloroplast stem-loop binding protein 41 kDa                        | <i>CSP41A</i> | At3g63140 | <b>At CSP41A L</b> | GCCAAGAAGGCTTTTCTATTCA    | <b>60°C</b> | #21 |
|                                                                     |               |           | <b>At CSP41A R</b> | TCCCACCCTAATAAGTCCTTAGC   |             |     |
| Oxygen-evolving enhancer protein 1-1, chloroplastic                 | <i>PSBO-1</i> | At5g66570 | <b>At PSBO-1 L</b> | TCAAGGCAGACAGTGTAAGCA     | <b>58°C</b> | #25 |
|                                                                     |               |           | <b>At PSBO-1 R</b> | AAATTGACGCTTCCGTCTGA      |             |     |
| Oxygen-evolving enhancer protein 1-2, chloroplastic                 | <i>PSBO-2</i> | At3g50820 | <b>At PSBO-2 L</b> | CACTCGATGAGATCGAAGGAC     | <b>60°C</b> | #52 |
|                                                                     |               |           | <b>At PSBO-2 R</b> | TGCTTAACCGTGAAGAGGAAC     |             |     |
| Chlorophyll a-b binding protein 2, chloroplastic                    | <i>CAB2</i>   | At1g29920 | <b>At CAB2 L</b>   | CCAGGAACGGAGTCAAGTTT      | <b>58°C</b> | #34 |
|                                                                     |               |           | <b>At CAB2 R</b>   | TCCATCGCTGAAGATCTGTG      |             |     |
| Chlorophyll a-b binding protein 3, chloroplastic                    | <i>CAB3</i>   | At1g29910 | <b>At CAB3 L</b>   | AGGCCGAGGACTTGCTTTA       | <b>58°C</b> | #87 |
|                                                                     |               |           | <b>At CAB3 R</b>   | CTCTGGGTCGGTAGCAAGAC      |             |     |
| Probable fructose-bisphosphate aldolase 1, chloroplastic            | <i>FBA1</i>   | At2g21330 | <b>At FBA1 L</b>   | CGCTACGCAGCTATTTCTCA      | <b>60°C</b> | #36 |
|                                                                     |               |           | <b>At FBA1 R</b>   | CGTGTTCTCCGTCCAACATA      |             |     |
| Fructose bisphosphate aldolase-like protein                         | <i>FBA1p</i>  | At3g52930 | <b>At FBA1p L</b>  | CTCGATCTCTCCGTCCAAC       | <b>58°C</b> | #8  |
|                                                                     |               |           | <b>At FBA1p R</b>  | CAGCGTTGGCGATCAACT        |             |     |
| Cell division protease ftsH homolog 2, chloroplastic (VARIEGATED 2) | <i>VAR2</i>   | At2g30950 | <b>At VAR2 L</b>   | CATCCTCCATATTTGCAGAGC     | <b>58°C</b> | #12 |

|                                                                           |                  |           |                       |                           |             |     |
|---------------------------------------------------------------------------|------------------|-----------|-----------------------|---------------------------|-------------|-----|
|                                                                           |                  |           | <b>At VAR2 R</b>      | ACAAGACAAGCTGATGAAGCTG    |             |     |
| Phosphoribulokinase,<br>chloroplastic                                     | <i>PRK</i>       | At1g32060 | <b>At PRK L</b>       | CATGTCACTGGACTTCTTGACC    | <b>60°C</b> | #75 |
|                                                                           |                  |           | <b>At PRK R</b>       | AGTCTCTTACTCGCTCATCAAACAT |             |     |
| RuBisCO large subunit-<br>binding protein subunit<br>alpha, chloroplastic | <i>CPN60A</i>    | At2g28000 | <b>At CPN60A L</b>    | ATGGAAAATGCTGGTGCAG       | <b>58°C</b> | #9  |
|                                                                           |                  |           | <b>At CPN60A R</b>    | GCAAGGATAGACGCAGTGGT      |             |     |
| Phosphoglycerate kinase,<br>chloroplastic                                 | <i>PGKchl</i>    | At1g56190 | <b>At PGKchl L</b>    | CATCAACGATAAGACAAAATCCAT  | <b>60°C</b> | #52 |
|                                                                           |                  |           | <b>At PGKchl R</b>    | GAGGGAATGTGTCCAAAGGA      |             |     |
| Glucan endo-1,3-beta-<br>glucosidase, acidic isoform                      | <i>BGL2</i>      | At3g57260 | <b>At BGL2 L</b>      | CAGCGAATGCGGCTCTAC        | <b>60°C</b> | #21 |
|                                                                           |                  |           | <b>At BGL2 R</b>      | CTGGGAACGTCGAGGATG        |             |     |
| Protein disulfide-isomerase<br>2                                          | <i>ATPDIL1-2</i> | At1g77510 | <b>At ATPDIL1-2 L</b> | GTCCTGCTTCTGTTGAAATTAAGTC | <b>58°C</b> | #59 |
|                                                                           |                  |           | <b>At ATPDIL1-2 R</b> | GATAATTTAGGGAACACTCCAACAG |             |     |
| Probable protein disulfide-<br>isomerase 1                                | <i>ATPDIL1-1</i> | At1g21750 | <b>At ATPDIL1-1 L</b> | TGACAAGAAGGTTGTTGTGGTT    | <b>60°C</b> | #36 |
|                                                                           |                  |           | <b>At ATPDIL1-1 R</b> | CAATGGCCATGAAAGAATCA      |             |     |
| V-type proton ATPase<br>subunit B1, vacuolar                              | <i>vATPS B1</i>  | At1g76030 | <b>At vATPS B1 L</b>  | CCCTCTCTCTGCTCGAATC       | <b>60°C</b> | #17 |
|                                                                           |                  |           | <b>At vATPS B1 R</b>  | CCCATTTTCACAGATCAACGA     |             |     |
| V-type proton ATPase<br>catalytic subunit A                               | <i>VHA-A</i>     | At1g78900 | <b>At VHA-A L</b>     | CGTTCTTCGAACACACAAGC      | <b>60°C</b> | #72 |
|                                                                           |                  |           | <b>At VHA-A R</b>     | TCTGAATTCCATCAAAGATATTTC  |             |     |

|                                                             |               |           |                   |                            |             |     |
|-------------------------------------------------------------|---------------|-----------|-------------------|----------------------------|-------------|-----|
| 14-3-3-like protein GF14<br>chi                             | <i>GRF1</i>   | At4g09000 | <b>At GRF1 L</b>  | TAAACAACAATGGCGACACC       | <b>60°C</b> | #73 |
|                                                             |               |           | <b>At GRF1 R</b>  | CTTGTTCCGGCGAGTTTCG        |             |     |
| 14-3-3-like protein GF14<br>omega                           | <i>GRF2</i>   | At1g78300 | <b>At GRF2 L</b>  | ACAATCTCACTCTCTGGACATCTG   | <b>60°C</b> | #38 |
|                                                             |               |           | <b>At GRF2 R</b>  | CTGTTCCCTCGGTCGGTTTT       |             |     |
| 14-3-3-like protein GF14<br>phi                             | <i>GRF4</i>   | At1g35160 | <b>At GRF4 L</b>  | TTACTCTCTGGACTTCTGACATGC   | <b>60°C</b> | #40 |
|                                                             |               |           | <b>At GRF4 R</b>  | AGAAACCACAAACTTAGATCTCCTTC |             |     |
| 14-3-3-like protein GF14<br>nu                              | <i>GRF7</i>   | At3g02520 | <b>At GRF7 L</b>  | ACGTCATTGGTGCTAGGAGAG      | <b>60°C</b> | #65 |
|                                                             |               |           | <b>At GRF7 R</b>  | CGTTTCCTCTGCTTTCTTCC       |             |     |
| 14-3-3-like protein GF14<br>mu                              | <i>GRF9</i>   | At2g42590 | <b>At GRF9 L</b>  | TGACCTTGTGGACTTCTGACAT     | <b>60°C</b> | #22 |
|                                                             |               |           | <b>At GRF9 R</b>  | TGCACACATATCATATCACTCTGC   |             |     |
| 14-3-3-like protein GF14<br>epsilon                         | <i>GRF10</i>  | At1g22300 | <b>At GRF10 L</b> | TCTTGAACTCTCCCGAAAGC       | <b>58°C</b> | #90 |
|                                                             |               |           | <b>At GRF10 R</b> | GAGTGCTGTCTTTGTATGATTCCTC  |             |     |
| Fe-superoxide dismutase 1                                   | <i>FSD1</i>   | At4g25100 | <b>At FSD1 L</b>  | AGTTCATGTTTCGAGTTTCTCTGC   | <b>58°C</b> | #46 |
|                                                             |               |           | <b>At FSD1 R</b>  | AGGACGTAGTTTGCGGTGAC       |             |     |
| Glycine-rich RNA-binding<br>protein 7                       | <i>ATGRP7</i> | At2g21660 | <b>ATGRP7 L</b>   | ATGGGCCACTGATGACAGA        | <b>60°C</b> | #8  |
|                                                             |               |           | <b>ATGRP7 R</b>   | CCTTGATCTTCCAGTCTCACG      |             |     |
| Elongation factor G,<br>chloroplastic, SNOWY<br>COTYLEDON 1 | <i>ATSCO1</i> | At1g62750 | <b>ATSCO1 L</b>   | AACCCGGTGGTCTCAAGG         | <b>60°C</b> | #53 |



---

|                  |              |           |                 |                          |              |   |
|------------------|--------------|-----------|-----------------|--------------------------|--------------|---|
| Polyubiquitin 10 | <i>UBQ10</i> | At4g05320 | <b>ATSCO1 R</b> | TCCCTCTCAATGTACTCACGTACT | <b>60° C</b> | - |
|                  |              |           | <b>UBQ10f</b>   | AACGGGAAA GACGATTAC      |              |   |
|                  |              |           | <b>UBQ10r</b>   | ACA AGA TGA AGG GTG GAC  |              |   |

---

**Table S2.** The content of cytokinin metabolites and abscisic acid.

The active cytokinins include *trans*-zeatin (tZ), *trans*-zeatin riboside (tZR), isopentenyladenine (iP), isopentenyladenosine (iPR), dihydrozeatin (DZ), dihydrozeatin riboside (DZR), *cis*-zeatin (cZ); cytokinin O-glucosides include tZOG, tZROG, DZOG; cytokinin phosphates include tZRMP, iPRMP and DZRMP; *cis*-zeatin derivatives include cZOG and cZROG; cytokinin N-glucosides include tZ7G, tZ9G, iP7G, iP9G, DZ7G. S30 – 30-min HS applied to shoots; S180 - 180-min HS applied to shoots; SR30 - 30-min HS applied to shoots and roots; SR180 - 180-min HS applied to shoots and roots; R30 - 30-min HS applied to roots; R180 - 180-min HS applied to roots HS.

| Treatment | Tissue           | Active CKs   |              |             |             |             |              |             |
|-----------|------------------|--------------|--------------|-------------|-------------|-------------|--------------|-------------|
|           | Leaves           | tZ           | tZR          | DZ          | DZR         | iP          | iPR          | cZ          |
| Control   | Col-0            | 2.62 ± 1.06  | 3.45 ± 1.18  | 0.72 ± 0.43 | 0.71 ± 0.35 | 0.14 ± 0.18 | 1.36 ± 0.34  | # ± #       |
|           | <i>ipt</i> + DEX | 28.16 ± 8.02 | 23.15 ± 2.11 | 3.53 ± 1.89 | # ± #       | 0.17 ± 0.20 | 3.70 ± 1.43  | # ± #       |
| S30       | Col-0            | 3.48 ± 0.32  | 2.26 ± 0.44  | 0.32 ± 0.23 | 0.50 ± 0.44 | 0.12 ± 0.08 | 1.39 ± 0.46  | # ± #       |
|           | <i>ipt</i> + DEX | 24.61 ± 2.34 | 23.33 ± 1.90 | 1.85 ± 0.62 | 3.10 ± 0.75 | 0.28 ± 0.20 | 2.31 ± 0.36  | # ± #       |
| S180      | Col-0            | 1.54 ± 0.60  | 1.03 ± 0.08  | 0.27 ± 0.38 | 0.33 ± 0.25 | 0.62 ± 0.34 | 1.27 ± 0.54  | # ± #       |
|           | <i>ipt</i> + DEX | 19.53 ± 3.21 | 18.36 ± 1.54 | 3.13 ± 0.10 | 0.66 ± 0.02 | 0.03 ± 0.03 | 2.73 ± 0.19  | 0.03 ± 0.02 |
| SR30      | Col-0            | 2.38 ± 0.17  | 3.85 ± 0.24  | 0.57 ± 0.08 | 0.54 ± 0.03 | # ± #       | 0.45 ± 0.03  | # ± #       |
|           | <i>ipt</i> + DEX | 22.11 ± 0.59 | 32.70 ± 0.87 | 0.73 ± 0.02 | 0.47 ± 0.01 | 0.10 ± 0.00 | 1.18 ± 0.03  | 0.13 ± 0.00 |
| SR180     | Col-0            | 1.55 ± 0.06  | 1.70 ± 0.16  | 0.43 ± 0.06 | 0.49 ± 0.06 | 0.05 ± 0.01 | 0.61 ± 0.05  | 0.08 ± 0.01 |
|           | <i>ipt</i> + DEX | 4.44 ± 0.49  | 6.38 ± 0.70  | 1.41 ± 0.16 | 0.65 ± 0.07 | # ± #       | 0.33 ± 0.04  | 0.17 ± 0.02 |
| R30       | Col-0            | 4.46 ± 0.35  | 1.98 ± 0.33  | 1.19 ± 0.10 | 0.32 ± 0.32 | 0.20 ± 0.06 | 0.36 ± 0.25  | 0.23 ± 0.04 |
|           | <i>ipt</i> + DEX | 24.54 ± 0.85 | 5.05 ± 0.76  | 5.10 ± 1.23 | 2.08 ± 2.95 | 1.45 ± 1.03 | 23.79 ± 1.31 | # ± #       |
| R180      | Col-0            | 5.79 ± 0.74  | 1.09 ± 0.02  | 0.24 ± 0.35 | 0.27 ± 0.38 | 0.17 ± 0.06 | 0.90 ± 0.10  | 0.04 ± 0.06 |
|           | <i>ipt</i> + DEX | 24.51 ± 2.15 | 7.79 ± 0.73  | 3.97 ± 0.61 | 1.43 ± 0.35 | 0.04 ± 0.03 | 1.84 ± 0.27  | # ± #       |
|           | Roots            | tZ           | tZR          | DZ          | DZR         | iP          | iPR          | cZ          |
| Control   | Col-0            | 1.51 ± 0.56  | 2.50 ± 0.70  | 1.58 ± 0.34 | 0.61 ± 0.25 | 0.25 ± 0.08 | 0.32 ± 0.15  | # ± #       |
|           | <i>ipt</i> + DEX | 2.71 ± 0.95  | 2.92 ± 1.01  | 1.22 ± 0.45 | 0.68 ± 0.26 | 0.05 ± 0.06 | 1.34 ± 0.44  | # ± #       |
| S30       | Col-0            | 1.86 ± 0.32  | 2.21 ± 0.14  | 1.49 ± 0.51 | 0.51 ± 0.46 | 0.98 ± 0.73 | 1.13 ± 0.22  | # ± #       |

|       |                  |             |             |             |             |             |             |             |
|-------|------------------|-------------|-------------|-------------|-------------|-------------|-------------|-------------|
|       | <i>ipt</i> + DEX | 5.06 ± 0.25 | 1.17 ± 0.11 | 1.70 ± 0.36 | 0.50 ± 0.42 | 0.09 ± 0.06 | 2.86 ± 0.34 | 0.01 ± 0.02 |
| S180  | Col-0            | 1.35 ± 0.05 | 1.06 ± 0.09 | # ± #       | 1.59 ± 0.57 | 0.27 ± 0.15 | 1.64 ± 0.52 | # ± #       |
|       | <i>ipt</i> + DEX | 2.53 ± 0.64 | 1.76 ± 0.30 | 0.69 ± 0.31 | 1.00 ± 0.08 | 0.13 ± 0.03 | 1.02 ± 0.30 | # ± #       |
| SR30  | Col-0            | 0.82 ± 0.07 | 0.78 ± 0.07 | 1.16 ± 0.10 | 2.01 ± 0.18 | # ± #       | 0.12 ± 0.01 | # ± #       |
|       | <i>ipt</i> + DEX | 1.11 ± 0.09 | 0.85 ± 0.07 | 1.78 ± 0.15 | 1.34 ± 0.11 | # ± #       | 0.23 ± 0.02 | 0.05 ± 0.00 |
| SR180 | Col-0            | 0.13 ± 0.09 | 1.16 ± 0.06 | 1.24 ± 0.03 | 1.20 ± 0.06 | # ± #       | 0.26 ± 0.01 | # ± #       |
|       | <i>ipt</i> + DEX | 0.48 ± 0.17 | 1.47 ± 0.21 | 0.79 ± 0.14 | 0.44 ± 0.19 | # ± #       | 0.12 ± 0.01 | # ± #       |
| R30   | Col-0            | 1.32 ± 0.98 | # ± #       | 1.07 ± 0.53 | 0.77 ± 0.38 | 0.29 ± 0.16 | 0.92 ± 0.59 | # ± #       |
|       | <i>ipt</i> + DEX | 2.57 ± 0.26 | 1.46 ± 0.25 | 0.72 ± 0.19 | 0.36 ± 0.22 | 0.03 ± 0.02 | 1.17 ± 0.13 | 0.01 ± 0.02 |
| R180  | Col-0            | 1.43 ± 1.17 | # ± #       | 1.20 ± 0.30 | 1.73 ± 0.91 | 0.41 ± 0.30 | 0.39 ± 0.67 | # ± #       |
|       | <i>ipt</i> + DEX | 1.86 ± 0.12 | 0.68 ± 0.25 | 0.37 ± 0.27 | 0.19 ± 0.27 | 0.14 ± 0.10 | 0.75 ± 0.06 | 0.02 ± 0.00 |

| Tissue    |                  | O-glc       |              |             | P (nucleotides) |              |              | cisZ derivates |             |
|-----------|------------------|-------------|--------------|-------------|-----------------|--------------|--------------|----------------|-------------|
| Treatment | Leaves           | DZOG        | tZOG         | tZROG       | tZRMP           | iPRMP        | DZRMP        | cZOG           | cZROG       |
| Control   | Col-0            | # ± #       | 15.11 ± 2.58 | 2.25 ± 0.69 | 15.55 ± 2.24    | 15.79 ± 2.90 | 2.38 ± 1.35  | 1.05 ± 0.25    | 3.83 ± 1.27 |
|           | <i>ipt</i> + DEX | # ± #       | 63.78 ± 7.71 | 7.49 ± 2.23 | 160.49 ± 17.21  | 45.40 ± 7.02 | 7.99 ± 1.93  | 1.79 ± 0.47    | 3.28 ± 0.54 |
| S30       | Col-0            | 0.14 ± 0.10 | 15.79 ± 0.77 | 3.44 ± 0.39 | 15.49 ± 3.06    | 21.65 ± 2.54 | 2.35 ± 0.95  | 0.32 ± 0.05    | 3.21 ± 0.93 |
|           | <i>ipt</i> + DEX | # ± #       | 43.72 ± 2.83 | 4.64 ± 0.74 | 191.39 ± 12.22  | 20.83 ± 6.84 | 16.46 ± 2.25 | 3.70 ± 0.92    | 4.88 ± 0.37 |
| S180      | Col-0            | 0.19 ± 0.26 | 16.14 ± 3.66 | 3.94 ± 1.15 | 10.86 ± 0.61    | 0.82 ± 0.63  | # ± #        | 1.45 ± 0.37    | 2.09 ± 0.58 |
|           | <i>ipt</i> + DEX | # ± #       | 23.09 ± 4.88 | 4.13 ± 0.88 | 96.80 ± 3.10    | 4.19 ± 0.13  | 4.03 ± 0.13  | 1.59 ± 0.61    | 6.93 ± 1.35 |
| SR30      | Col-0            | # ± #       | 23.57 ± 0.84 | 2.60 ± 0.16 | 16.26 ± 1.43    | 6.89 ± 0.43  | 2.92 ± 0.18  | 2.11 ± 0.13    | 3.82 ± 0.24 |
|           | <i>ipt</i> + DEX | # ± #       | 35.94 ± 4.12 | 3.46 ± 0.09 | 180.01 ± 4.76   | 18.21 ± 0.48 | 7.79 ± 0.21  | 2.10 ± 0.06    | 3.39 ± 0.09 |
| SR180     | Col-0            | # ± #       | 20.32 ± 0.77 | 1.84 ± 0.21 | 12.88 ± 0.80    | 9.70 ± 0.69  | # ± #        | 1.55 ± 0.18    | 3.23 ± 0.37 |
|           | <i>ipt</i> + DEX | # ± #       | 29.85 ± 3.28 | 4.97 ± 0.55 | 36.67 ± 4.03    | 0.91 ± 0.10  | 4.69 ± 0.52  | 1.33 ± 0.15    | 7.34 ± 0.81 |
| R30       | Col-0            | # ± #       | 22.89 ± 1.02 | 4.39 ± 1.17 | 5.46 ± 3.09     | 18.24 ± 0.61 | 1.67 ± 0.70  | 1.73 ± 0.17    | 3.16 ± 0.39 |
|           | <i>ipt</i> + DEX | # ± #       | 36.32 ± 3.54 | 7.65 ± 0.70 | 84.53 ± 6.21    | 38.70 ± 8.05 | 2.77 ± 0.76  | 5.18 ± 0.41    | 6.45 ± 1.17 |
| R180      | Col-0            | # ± #       | 28.59 ± 2.46 | 2.04 ± 0.72 | 5.61 ± 2.39     | 17.06 ± 0.98 | # ± #        | 1.68 ± 0.63    | 2.86 ± 0.37 |
|           | <i>ipt</i> + DEX | # ± #       | 33.06 ± 1.70 | 6.67 ± 2.85 | 121.56 ± 2.83   | 23.60 ± 5.66 | 3.84 ± 0.83  | 4.17 ± 1.08    | 4.26 ± 0.89 |
| Roots     |                  | DZOG        | tZOG         | tZROG       | tZRMP           | iPRMP        | DZRMP        | cZOG           | cZROG       |

|         |                  |             |             |             |              |             |             |       |             |
|---------|------------------|-------------|-------------|-------------|--------------|-------------|-------------|-------|-------------|
| Control | Col-0            | # ± #       | 0.70 ± 0.18 | # ± #       | 5.69 ± 0.98  | 4.46 ± 0.83 | # ± #       | # ± # | 0.10 ± 0.05 |
|         | <i>ipt</i> + DEX | # ± #       | 0.95 ± 0.46 | 0.32 ± 0.15 | 13.10 ± 1.66 | 3.47 ± 1.11 | 1.08 ± 0.60 | # ± # | # ± #       |
| S30     | Col-0            | 0.18 ± 0.13 | 0.60 ± 0.30 | 0.42 ± 0.08 | 6.05 ± 2.02  | 6.76 ± 0.87 | # ± #       | # ± # | # ± #       |
|         | <i>ipt</i> + DEX | # ± #       | 0.53 ± 0.11 | 0.19 ± 0.02 | 12.14 ± 0.12 | 3.03 ± 0.64 | 0.47 ± 0.66 | # ± # | 0.02 ± 0.03 |
| S180    | Col-0            | # ± #       | 1.11 ± 0.16 | 0.26 ± 0.22 | 4.90 ± 0.69  | 1.53 ± 0.24 | # ± #       | # ± # | 0.16 ± 0.12 |
|         | <i>ipt</i> + DEX | # ± #       | 0.69 ± 0.13 | 0.20 ± 0.02 | 4.15 ± 0.10  | 1.79 ± 0.28 | 0.83 ± 0.13 | # ± # | # ± #       |
| SR30    | Col-0            | # ± #       | 0.74 ± 0.07 | # ± #       | 3.99 ± 0.35  | 2.00 ± 0.18 | 1.39 ± 0.12 | # ± # | 0.22 ± 0.02 |
|         | <i>ipt</i> + DEX | # ± #       | 1.27 ± 0.15 | 0.54 ± 0.05 | 4.91 ± 0.41  | 1.33 ± 0.11 | 1.71 ± 0.14 | # ± # | # ± #       |
| SR180   | Col-0            | # ± #       | 1.34 ± 0.06 | 0.75 ± 0.04 | 2.24 ± 0.11  | # ± #       | # ± #       | # ± # | 0.02 ± 0.00 |
|         | <i>ipt</i> + DEX | # ± #       | 1.65 ± 0.10 | 0.54 ± 0.03 | 2.38 ± 0.15  | # ± #       | 0.35 ± 0.02 | # ± # | # ± #       |
| R30     | Col-0            | # ± #       | 1.03 ± 0.70 | # ± #       | 5.38 ± 2.95  | 1.39 ± 0.83 | 0.95 ± 0.47 | # ± # | # ± #       |
|         | <i>ipt</i> + DEX | # ± #       | 0.42 ± 0.12 | 0.26 ± 0.05 | 10.61 ± 0.15 | 0.35 ± 0.07 | 0.39 ± 0.36 | # ± # | 0.07 ± 0.03 |
| R180    | Col-0            | # ± #       | 0.91 ± 0.75 | # ± #       | 1.22 ± 0.53  | 0.85 ± 0.47 | 1.06 ± 1.13 | # ± # | # ± #       |
|         | <i>ipt</i> + DEX | # ± #       | 1.51 ± 0.20 | 0.31 ± 0.01 | 1.47 ± 0.75  | 5.27 ± 0.20 | 0.65 ± 0.62 | # ± # | # ± #       |

|             |            | ABA          |             |
|-------------|------------|--------------|-------------|
|             |            | Leaves       | Roots       |
| DEX         | Col-0      | 18.42 ± 0.11 | 3.26 ± 0.63 |
|             | <i>ipt</i> | 18.64 ± 0.61 | 4.20 ± 0.14 |
| S30 + DEX   | Col-0      | 20.64 ± 1.23 | 2.53 ± 0.09 |
|             | <i>ipt</i> | 28.57 ± 1.19 | 1.49 ± 0.16 |
| S180 + DEX  | Col-0      | 10.40 ± 0.83 | 1.57 ± 0.32 |
|             | <i>ipt</i> | 22.30 ± 0.71 | 1.60 ± 0.16 |
| SR30 + DEX  | Col-0      | 28.66 ± 1.13 | 4.15 ± 0.41 |
|             | <i>ipt</i> | 31.71 ± 1.31 | 2.83 ± 0.21 |
| SR180 + DEX | Col-0      | 18.12 ± 1.79 | 3.22 ± 0.21 |
|             | <i>ipt</i> | 22.55 ± 1.78 | 2.86 ± 0.21 |
| R30 + DEX   | Col-0      | 20.57 ± 0.42 | 2.48 ± 0.37 |
|             | <i>ipt</i> | 20.12 ± 1.41 | 1.26 ± 0.13 |
| R180 + DEX  | Col-0      | 15.82 ± 0.73 | 2.47 ± 0.45 |

$$ipt \left| 14.30 \pm 0.71 \right| 1.85 \pm 0.36 \left|$$

**Table S3.** The effect of individual HS treatments on expression levels of genes involved in cytokinin and abscisic acid metabolism and signalling, photosynthesis- and selected stress-related genes.

S30 – 30-min HS applied to shoots; S180 - 180-min HS applied to shoots; SR30 - 30-min HS applied to shoots and roots; SR180 - 180-min HS applied to shoots and roots; R30 - 30-min HS applied to roots; R180 - 180-min HS applied to roots HS.

| LEAVES                   | CK-related genes |             |              |              |             |             |             |                 | ABA-related genes |             |              |             |             |             |             |              | Photosynthesis-related genes |                 |                |                |             |             |               |               |             |              |             |              | Others       |             |             |             |             |             |                  |                  |             |             |             |             |             |              |             |                          |               |            |
|--------------------------|------------------|-------------|--------------|--------------|-------------|-------------|-------------|-----------------|-------------------|-------------|--------------|-------------|-------------|-------------|-------------|--------------|------------------------------|-----------------|----------------|----------------|-------------|-------------|---------------|---------------|-------------|--------------|-------------|--------------|--------------|-------------|-------------|-------------|-------------|-------------|------------------|------------------|-------------|-------------|-------------|-------------|-------------|--------------|-------------|--------------------------|---------------|------------|
|                          | <i>ARR8</i>      | <i>ARR9</i> | <i>ARR10</i> | <i>ARR12</i> | <i>AHK2</i> | <i>AHK3</i> | <i>AHK4</i> | <i>Agro IPT</i> | <i>AAO2</i>       | <i>ABA1</i> | <i>NCED3</i> | <i>ABF2</i> | <i>ABI1</i> | <i>ABI5</i> | <i>ABI8</i> | <i>ATHB6</i> | <i>CYP707A3</i>              | <i>CYP707A3</i> | <i>UGT75B1</i> | <i>UGT71B6</i> | <i>CAB2</i> | <i>CAB3</i> | <i>CPN60A</i> | <i>CSP41A</i> | <i>FBA1</i> | <i>FBA1p</i> | <i>FSD1</i> | <i>PSBO1</i> | <i>PSBO2</i> | <i>RPS1</i> | <i>SCO1</i> | <i>VAR2</i> | <i>ACD2</i> | <i>ATB2</i> | <i>ATPDILI-1</i> | <i>ATPDILI-2</i> | <i>GRF1</i> | <i>GRF2</i> | <i>GRF4</i> | <i>GRF7</i> | <i>GRF9</i> | <i>GRF10</i> | <i>GRP7</i> | <i>MD<sub>cyt1</sub></i> | <i>RABE1b</i> | <i>VP1</i> |
| Col-0 Control            | 7.0919           | 3.6859      | 2.4712       | 1.3139       | 1.2348      | 1.0497      | 1.8051      | ND              | 2.9554            | 2.7213      | 0.3487       | 1.5163      | 1.3367      | 0.2441      | 1.4111      | 0.8903       | 5.1469                       | 5.1469          | 0.5448         | 0.3568         | 2.2224      | 1.5248      | 1.6044        | 1.8097        | 1.5272      | 1.9111       | 1.5043      | 1.5170       | 1.4147       | 1.3473      | 2.0459      | 1.7526      | 0.8810      | 0.6466      | 0.4767           | 0.3329           | 1.1936      | 1.7423      | 1.3676      | 1.0352      | 1.2949      | 1.2774       | 0.2324      | 0.9673                   | 1.6218        | 1.4        |
| SD                       | 0.0017           | 0.4871      | 0.0680       | 0.4586       | 0.1259      | 0.0268      | 0.0210      | ND              | 0.0813            | 0.1476      | 0.0506       | 0.0243      | 0.2645      | 0.1706      | 0.0285      | 0.0281       | 0.0829                       | 0.0829          | 0.1332         | 0.0205         | 0.0954      | 0.1335      | 0.0045        | 0.0724        | 0.1185      | 0.1115       | 0.3542      | 0.1145       | 0.1236       | 0.0607      | 0.1719      | 0.1366      | 0.2876      | 0.1337      | 0.0033           | 0.0091           | 0.0525      | 0.0466      | 0.4907      | 0.0838      | 0.0579      | 0.1715       | 0.0065      | 0.0214                   | 0.0099        | 0.0        |
| Col-0 S30                | 0.1625           | 0.2161      | 0.5176       | 0.2966       | 0.2495      | 0.2308      | 0.2367      | ND              | 0.6457            | 0.6448      | 0.2343       | 0.3576      | 0.3153      | 0.0254      | 0.1268      | 0.1334       | 5.9922                       | 5.9922          | 0.1799         | 0.1774         | 0.7444      | 0.5158      | 1.9605        | 0.5847        | 0.7571      | 1.6188       | 0.6909      | 0.5305       | 0.8181       | 0.4806      | 0.4960      | 0.6008      | 0.3376      | 0.4493      | 0.0920           | 0.0643           | 0.3869      | 0.5455      | 0.4611      | 0.3903      | 0.4973      | 0.4379       | 0.1061      | 0.2692                   | 0.4064        | 0.5        |
| SD                       | 0.0580           | 0.1107      | 0.0510       | 0.0595       | 0.0073      | 0.0777      | 0.0718      | ND              | 0.0580            | 0.0675      | 0.0931       | 0.0621      | 0.0830      | 0.0032      | 0.0040      | 0.0157       | 1.7767                       | 1.7767          | 0.0428         | 0.0736         | 0.1119      | 0.1713      | 0.2535        | 0.0873        | 0.2295      | 1.0091       | 0.1228      | 0.1192       | 0.2091       | 0.0032      | 0.0208      | 0.0340      | 0.0510      | 0.0222      | 0.0235           | 0.0121           | 0.0784      | 0.0706      | 0.0707      | 0.0259      | 0.0788      | 0.0344       | 0.1040      | 0.0185                   | 0.0339        | 0.1        |
| Col-0 S180               | 0.1000           | 0.0410      | 0.2572       | 0.1609       | 0.0726      | 0.0940      | 0.0660      | ND              | 0.4336            | 0.5888      | 0.0364       | 0.1067      | 0.1206      | ND          | 0.2673      | 0.0259       | 1.2850                       | 1.2850          | 0.2873         | 0.0972         | 0.7247      | 0.4063      | 1.7631        | 0.5048        | 0.4547      | 1.1896       | 0.5634      | 0.3814       | 0.5100       | 0.4597      | 0.4607      | 0.5947      | 0.2403      | 0.6341      | 0.0488           | 0.1177           | 0.2183      | 0.5616      | 0.2958      | 0.3017      | 0.4506      | 0.2597       | 0.0690      | 0.1683                   | 0.4940        | 0.2        |
| SD                       | 0.0010           | 0.0007      | 0.0295       | 0.0056       | 0.0101      | 0.0138      | 0.0059      | ND              | 0.0284            | 0.0112      | 0.0205       | 0.0168      | 0.0045      | ND          | 0.0695      | 0.0058       | 0.1067                       | 0.1067          | 0.0330         | 0.0077         | 0.1855      | 0.0915      | 0.1508        | 0.0671        | 0.0506      | 0.2584       | 0.0305      | 0.0112       | 0.0108       | 0.0554      | 0.0924      | 0.0478      | 0.0363      | 0.0300      | 0.0100           | 0.0327           | 0.0196      | 0.1302      | 0.0443      | 0.0152      | 0.0744      | 0.0038       | 0.0115      | 0.0035                   | 0.0087        | 0.0        |
| <i>ipt</i> + DEX Control | 4.7446           | 2.8308      | 1.9361       | 1.2667       | 0.9745      | 0.7537      | 1.6392      | 1.0380          | 1.9026            | 2.1964      | 0.2612       | 1.1230      | 1.5862      | 0.5137      | 1.2972      | 0.7980       | 3.7949                       | 3.7949          | 0.7595         | 0.1609         | 2.2289      | 1.3969      | 1.2768        | 1.9713        | 1.0517      | 1.6954       | 1.9799      | 1.5046       | 1.4834       | 1.4864      | 1.8055      | 1.5973      | 0.9571      | 1.0371      | 0.9978           | 1.2905           | 1.1166      | 1.6479      | 1.3639      | 1.0790      | 1.1241      | 1.1501       | 0.1543      | 0.9454                   | 1.4408        | 1.2        |
| SD                       | 0.9224           | 0.0218      | 0.4257       | 0.1338       | 0.1187      | 0.1124      | 0.2673      | 0.3031          | 0.3822            | 0.0063      | 0.0914       | 0.0323      | 0.1578      | 0.1073      | 0.2902      | 0.0358       | 0.6091                       | 0.6091          | 0.0797         | 0.0777         | 0.5940      | 0.2030      | 0.5408        | 0.6361        | 0.2120      | 0.5353       | 0.3936      | 0.2139       | 0.1871       | 0.1650      | 0.2471      | 0.4328      | 0.0953      | 0.1581      | 0.4314           | 0.0511           | 0.2872      | 0.3085      | 0.4516      | 0.3259      | 0.0367      | 0.2471       | 0.0284      | 0.0937                   | 0.2517        | 0.3        |
| <i>ipt</i> S30           | 0.0689           | 0.0612      | 0.3817       | 0.2329       | 0.1638      | 0.1204      | 0.1769      | 0.5756          | 0.4130            | 0.5418      | 0.6249       | 0.3470      | 0.1651      | 0.0435      | 0.0804      | 0.0831       | 9.8336                       | 9.8336          | 0.2222         | 0.1152         | 0.7342      | 0.4771      | 2.2883        | 0.5836        | 0.3717      | 1.4582       | 0.6104      | 0.4804       | 0.5925       | 0.5141      | 0.4565      | 0.7115      | 0.4017      | 0.5269      | 0.0960           | 0.0845           | 0.3517      | 0.4741      | 0.3883      | 0.3349      | 0.4484      | 0.3897       | 0.1436      | 0.2923                   | 0.4947        | 0.5        |
| SD                       | 0.0185           | 0.0109      | 0.1427       | 0.0596       | 0.0582      | 0.0274      | 0.0640      | 0.1444          | 0.1473            | 0.1899      | 0.1011       | 0.0824      | 0.0258      | 0.0144      | 0.0199      | 0.0284       | 3.5366                       | 3.5366          | 0.0584         | 0.0100         | 0.0914      | 0.0577      | 0.2239        | 0.0157        | 0.0197      | 0.1346       | 0.0464      | 0.1255       | 0.1244       | 0.1089      | 0.0791      | 0.1967      | 0.1388      | 0.0545      | 0.0325           | 0.0322           | 0.0325      | 0.0113      | 0.0324      | 0.0877      | 0.0993      | 0.0940       | 0.0160      | 0.0683                   | 0.0980        | 0.0        |
| <i>ipt</i> S180          | 0.0617           | 0.0376      | 0.2387       | 0.1358       | 0.0569      | 0.0842      | 0.0459      | 0.8575          | 0.3186            | 0.4881      | 0.0205       | 0.0801      | 0.0687      | 0.0410      | 0.3540      | 0.0161       | 1.3506                       | 1.3506          | 0.2395         | 0.0740         | 0.6000      | 0.3259      | 1.4784        | 0.5073        | 0.4367      | 0.9414       | 0.5245      | 0.3747       | 0.5147       | 0.4846      | 0.4976      | 0.6400      | 0.2220      | 0.4282      | 0.0488           | 0.1439           | 0.2380      | 0.5762      | 0.3627      | 0.3132      | 0.3892      | 0.3186       | 0.0764      | 0.1984                   | 0.4993        | 0.2        |
| SD                       | 0.0175           | 0.0118      | 0.0487       | 0.0133       | 0.0068      | 0.0157      | 0.0039      | 0.2359          | 0.0790            | 0.1291      | 0.0043       | 0.0061      | 0.0108      | 0.0026      | 0.0180      | 0.0235       | 0.5415                       | 0.5415          | 0.0020         | 0.0141         | 0.1844      | 0.0585      | 0.0122        | 0.0577        | 0.1834      | 0.0732       | 0.1273      | 0.0110       | 0.0469       | 0.0632      | 0.0347      | 0.0125      | 0.0217      | 0.1382      | 0.0106           | 0.0434           | 0.0168      | 0.0536      | 0.0338      | 0.0431      | 0.0065      | 0.0314       | 0.0021      | 0.0169                   | 0.0247        | 0.0        |
| Col-0 SR30               | 0.1813           | 0.1286      | 0.2393       | 0.1861       | 0.1549      | 0.3351      | 0.1843      | ND              | 0.2627            | 0.4300      | 1.3887       | 0.3956      | 0.2166      | 0.0331      | 0.2830      | 0.2940       | 1.0803                       | 0.4130          | 2.0153         | 0.3176         | 0.4871      | 0.4398      | 2.0550        | 0.2944        | 0.6281      | 1.7468       | 0.2542      | 0.4397       | 0.5050       | 0.4872      | 0.3524      | 0.5350      | 0.4142      | 0.3448      | 0.1486           | 0.1538           | 0.2859      | 0.3406      | 0.3107      | 0.3166      | 0.5703      | 0.3120       | 0.1440      | 0.2665                   | 0.4606        | 0.5        |
| SD                       | 0.0275           | 0.0095      | 0.0413       | 0.0106       | 0.0006      | 0.0337      | 0.0339      | ND              | 0.0620            | 0.0000      | 0.7807       | 0.1535      | 0.0521      | 0.0139      | 0.0469      | 0.0198       | 0.5266                       | 0.0050          | 0.4557         | 0.0259         | 0.1276      | 0.1258      | 0.0432        | 0.2693        | 0.0442      | 0.0680       | 0.0834      | 0.0680       | 0.0835       | 0.0535      | 0.1189      | 0.0787      | 0.0578      | 0.0006      | 0.0311           | 0.0598           | 0.0437      | 0.0506      | 0.0499      | 0.0024      | 0.1255      | 0.0177       | 0.0334      | 0.0398                   | 0.0186        | 0.2        |
| Col-0 SR30               | 0.5890           | 0.5882      | 0.5985       | 0.4710       | 0.9159      | 1.4946      | 0.3844      | ND              | 0.3690            | 0.9632      | 1.7115       | 0.5764      | 1.1297      | 0.4264      | 1.0674      | 1.1561       | 0.4130                       | 1.1772          | 0.7739         | 0.6647         | 1.4274      | 0.9223      | 2.1548        | 0.8900        | 0.1974      | 0.5058       | 0.8492      | 0.9585       | 1.0735       | 0.8218      | 0.6157      | 1.4669      | 0.9162      | 1.2817      | 0.3155           | 0.5866           | 0.8418      | 0.4411      | 0.5531      | 0.7648      | 1.9898      | 0.6700       | 0.7682      | 0.4705                   | 0.5442        | 0.4        |
| SD                       | 0.0163           | 0.0197      | 0.0194       | 0.0775       | 0.0809      | 0.0753      | 0.0125      | ND              | 0.0327            | 0.0000      | 0.1933       | 0.0013      | 0.1362      | 0.0828      | 0.0538      | 0.0194       | 0.0050                       | 0.2023          | 0.1749         | 0.2140         | 0.0223      | 0.0315      | 0.2664        | 0.0368        | 0.0687      | 0.1002       | 0.1329      | 0.1363       | 0.0860       | 0.0810      | 0.0646      | 0.2845      | 0.0591      | 0.0728      | 0.0073           | 0.0263           | 0.1806      | 0.0930      | 0.0270      | 0.0366      | 0.0135      | 0.1357       | 0.1758      | 0.0284                   | 0.0757        | 0.0        |
| <i>ipt</i> SR30          | 0.1412           | 0.0943      | 0.1974       | 0.1832       | 0.1146      | 0.2763      | 0.2002      | 0.4860          | 0.2344            | 0.3156      | 1.5202       | 0.2309      | 0.3172      | 0.0558      | 0.2687      | 0.2817       | 0.8158                       | 0.8158          | 0.1759         | 0.1870         | 0.4249      | 0.5229      | 2.1849        | 0.3840        | 0.4054      | 2.0268       | 0.4383      | 0.3989       | 0.4750       | 0.4978      | 0.3731      | 0.4773      | 0.3617      | 0.3518      | 0.2062           | 0.3626           | 0.3506      | 0.3686      | 0.3233      | 0.3892      | 0.6182      | 0.3257       | 0.1919      | 0.2772                   | 0.4038        | 0.4        |
| SD                       | 0.0001           | 0.0263      | 0.0358       | 0.0340       | 0.0347      | 0.0136      | 0.0754      | 0.0531          | 0.0861            | 0.0000      | 0.4714       | 0.0487      | 0.0649      | 0.0188      | 0.0410      | 0.0567       | 0.1349                       | 0.1349          | 0.0219         | 0.0388         | 0.1941      | 0.0183      | 0.4496        | 0.1461        | 0.0289      | 0.7144       | 0.0555      | 0.1298       | 0.1850       | 0.2193      | 0.1109      | 0.1074      | 0.0464      | 0.0846      | 0.0122           | 0.0471           | 0.0692      | 0.0986      | 0.1326      | 0.0443      | 0.0720      | 0.0923       | 0.0248      | 0.0811                   | 0.1643        | 0.1        |
| <i>ipt</i> SR180         | 0.4567           | 0.4074      | 0.5947       | 0.4206       | 0.7797      | 1.0593      | 0.2684      | 0.7967          | 0.2759            | 1.0584      | 1.8642       | 0.7887      | 1.1191      | 0.4521      | 1.0574      | 1.4086       | 0.3825                       | 0.3825          | 1.8976         | 0.3075         | 1.2583      | 0.7764      | 2.4892        | 0.7103        | 0.1351      | 0.5077       | 0.7668      | 0.8611       | 0.9964       | 0.7853      | 0.6918      | 1.3982      | 0.7788      | 1.2654      | 0.4585           | 0.8246           | 0.8118      | 0.3851      | 0.5943      | 0.8712      | 1.6423      | 0.6610       | 0.7329      | 0.4618                   | 0.5182        | 0.4        |
| SD                       | 0.0375           | 0.2073      | 0.1356       | 0.0864       | 0.2384      | 0.0232      | 0.0005      | 0.1346          | 0.0740            | 0.0000      | 1.0055       | 0.2137      | 0.5460      | 0.3372      | 0.0524      | 0.3725       | 0.1383                       | 0.1383          | 1.0097         | 0.0288         | 0.3363      | 0.2044      | 0.2260        | 0.2893        | 0.0953      | 0.1319       | 0.0444      | 0.3007       | 0.2404       | 0.1575      | 0.1958      | 0.5414      | 0.1655      | 0.0707      | 0.1636           | 0.2549           | 0.0117      | 0.0433      | 0.0630      | 0.1502      | 0.1283      | 0.1041       | 0.1124      | 0.0034                   | 0.1251        | 0.0        |
| Col-0 R30                | 1.3232           | 1.4182      | 1.4820       | 0.8113       | 1.7257      | 1.5663      | 1.1673      | ND              | 1.3386            | 2.4471      | 37.6466      | 3.5283      | 3.5978      | 1.1511      | 2.2428      | 1.5171       | 0.6887                       | 0.6887          | 1.6862         | 1.7838         | 1.0199      | 1.0440      | 1.2794        | 1.0462        | 0.6622      | 1.7143       | 1.3009      | 1.1340       | 1.0189       | 1.2297      | 1.4134      | 1.1992      | 2.3323      | 1.7766      | 1.1598           | 1.0765           | 1.2542      | 1.3892      | 1.0563      | 1.3760      | 1.2337      | 1.0702       | 0.3262      | 1.1909                   | 1.1722        | 1.0        |

|                   |        |        |        |        |        |        |        |          |        |        |         |        |        |        |        |        |          |          |         |         |        |        |        |        |        |        |        |        |        |        |        |        |        |        |           |           |        |        |        |        |        |        |        |        |        |     |
|-------------------|--------|--------|--------|--------|--------|--------|--------|----------|--------|--------|---------|--------|--------|--------|--------|--------|----------|----------|---------|---------|--------|--------|--------|--------|--------|--------|--------|--------|--------|--------|--------|--------|--------|--------|-----------|-----------|--------|--------|--------|--------|--------|--------|--------|--------|--------|-----|
| SD                | 0.2401 | 0.4059 | 0.3788 | 0.1770 | 0.3223 | 0.1739 | 0.1979 | ND       | 0.3129 | 0.7016 | 15.4845 | 0.7947 | 1.4414 | 0.7055 | 0.0527 | 0.4604 | 0.0000   | 0.1260   | 0.3492  | 0.1805  | 0.0671 | 0.0303 | 0.2110 | 0.0994 | 0.0466 | 0.2576 | 0.1392 | 0.0761 | 0.0734 | 0.1332 | 0.1135 | 0.0962 | 0.4344 | 0.1180 | 0.3349    | 0.3326    | 0.1352 | 0.0632 | 0.2966 | 0.1409 | 0.0196 | 0.0098 | 0.0080 | 0.1419 | 0.1594 | 0.0 |
| Col-0 R180        | 1.1475 | 1.6436 | 1.1853 | 1.5261 | 2.8810 | 1.5939 | 0.8342 | ND       | 1.0664 | 2.3112 | 6.2277  | 1.7374 | 1.7226 | 1.5549 | 1.9175 | 1.9848 | 3.7365   | 3.7365   | 3.0104  | 0.9417  | 1.2242 | 1.2656 | 0.9314 | 0.9838 | 0.9655 | 1.3432 | 0.7197 | 1.0094 | 0.9875 | 1.3073 | 1.0546 | 0.9710 | 1.6843 | 1.4145 | 0.6304    | 0.5667    | 0.9363 | 1.3350 | 0.8845 | 0.9470 | 1.1280 | 0.9208 | 0.5600 | 0.8592 | 0.9288 | 0.9 |
| SD                | 0.4606 | 0.2044 | 0.0446 | 0.3766 | 0.5416 | 0.0096 | 0.0363 | ND       | 0.1313 | 0.2220 | 1.4556  | 0.1826 | 0.0418 | 0.6933 | 0.0018 | 0.0720 | 0.6331   | 0.6331   | 0.1364  | 0.0427  | 0.2164 | 0.3308 | 0.0969 | 0.0164 | 0.1553 | 0.1370 | 0.0855 | 0.1183 | 0.1289 | 0.2783 | 0.1780 | 0.1847 | 0.1337 | 0.0419 | 0.0072    | 0.0067    | 0.0984 | 0.1787 | 0.0471 | 0.0738 | 0.0541 | 0.1579 | 0.1186 | 0.0625 | 0.0841 | 0.1 |
| ipt SR30          | 0.8796 | 1.0705 | 0.9870 | 0.7991 | 1.1933 | 1.0311 | 0.8137 | 0.7200   | 0.6529 | 1.5212 | 1.7885  | 1.0671 | 1.3880 | 0.4953 | 1.4733 | 1.4685 | 5.3708   | 5.3708   | 1.1437  | 1.1086  | 0.8720 | 0.6808 | 0.7341 | 0.7791 | 0.1707 | 2.0852 | 0.8238 | 0.6655 | 0.6693 | 0.7151 | 0.8172 | 0.7412 | 0.9805 | 1.3715 | 1.9477    | 1.8182    | 1.0006 | 1.2291 | 0.7942 | 1.1814 | 0.8316 | 1.3185 | 0.3720 | 0.7561 | 0.7455 | 0.7 |
| SD                | 0.0315 | 0.3349 | 0.1055 | 0.0215 | 0.0172 | 0.0313 | 0.2775 | 0.1275   | 0.2192 | 0.2599 | 0.0377  | 0.3287 | 0.0792 | 0.0914 | 0.0891 | 0.0594 | 1.2569   | 1.2569   | 0.4076  | 0.3633  | 0.1572 | 0.1572 | 0.0434 | 0.1235 | 0.2394 | 0.7064 | 0.2040 | 0.0613 | 0.0195 | 0.0798 | 0.2294 | 0.1228 | 0.0947 | 0.0715 | 0.0063    | 0.1943    | 0.2230 | 0.2221 | 0.1064 | 0.0133 | 0.1706 | 0.6197 | 0.0182 | 0.0987 | 0.1231 | 0.1 |
| ipt SR180         | 1.6786 | 1.8731 | 0.9639 | 1.0549 | 1.5590 | 1.1537 | 0.9821 | 0.7617   | 0.7246 | 1.2044 | 2.5227  | 1.0903 | 1.3098 | 0.7565 | 1.1648 | 1.3560 | 3.1237   | 3.1237   | 1.5872  | 0.7924  | 0.7593 | 0.7281 | 0.7366 | 0.7857 | 0.6642 | 1.0711 | 0.8548 | 1.0086 | 0.9067 | 0.9619 | 0.7763 | 0.8169 | 1.0158 | 1.1743 | 0.7538    | 0.6421    | 0.7829 | 0.9399 | 0.7615 | 0.8588 | 0.8955 | 0.8181 | 0.6023 | 0.7017 | 0.7536 | 0.8 |
| SD                | 0.6559 | 0.6467 | 0.2858 | 0.1892 | 0.4813 | 0.1855 | 0.3947 | 0.3838   | 0.1360 | 0.5481 | 0.5311  | 0.3097 | 0.3823 | 0.5077 | 0.2685 | 0.5351 | 0.9770   | 0.9770   | 0.6203  | 0.0525  | 0.1425 | 0.0617 | 0.1567 | 0.1986 | 0.8919 | 0.1966 | 0.2492 | 0.1629 | 0.3262 | 0.2592 | 0.1821 | 0.1431 | 0.3158 | 0.1543 | 0.1546    | 0.1290    | 0.1735 | 0.3007 | 0.1519 | 0.1047 | 0.1402 | 0.1887 | 0.0105 | 0.1196 | 0.2056 | 0.2 |
| ROOTS             | ARR8   | ARR9   | ARR10  | ARR12  | AHK2   | AHK3   | AHK4   | Agro IPT | AAO2   | ABAI   | NCED3   | ABF2   | AB11   | AB15   | AB18   | ATHB6  | CYP707A3 | CYP707A3 | UGT75B1 | UGT71B6 | CAB2   | CAB3   | CPN60A | CSP41A | FBA1   | FBA1p  | FSD1   | PSBO1  | PSBO2  | RPS1   | SCO1   | VAR2   | ACD2   | ATB2   | ATPDILI-1 | ATPDILI-2 | GRF1   | GRF2   | GRF4   | GRF7   | GRF9   | GRF10  | GRP7   | MDcyl1 | RABE1b | VI  |
| Col-0 Control     | 7.6283 | 1.6197 | 4.9264 | 3.1865 | 2.4663 | 1.2446 | 8.0744 | ND       | 2.7948 | 0.1021 | 0.0780  | 1.4611 | 0.7055 | 0.3210 | 2.0313 | 0.2914 | 29.2510  | 19.9864  | 0.0038  | 0.1198  | 0.0004 | 0.0001 | 0.3643 | 0.0002 | 0.0004 | 4.3970 | 0.1483 | 0.0005 | 0.0005 | 0.0667 | 0.0207 | 0.0389 | 0.0743 | 3.3598 | 1.4294    | 0.4578    | 1.6601 | 3.4794 | 4.3236 | 1.6601 | 0.4387 | 2.0400 | 1.3770 | 1.6395 | 0.0640 | 1.0 |
| SD                | 0.8890 | 0.4051 | 0.7022 | 0.4520 | 0.9576 | 0.1993 | 0.9485 | ND       | 0.5810 | 0.0207 | 0.0115  | 0.2920 | 0.1336 | 0.1090 | 0.4120 | 0.0872 | 4.3641   | 3.5072   | 0.0031  | 0.0222  | 0.0002 | 0.0001 | 0.1215 | 0.0001 | 0.0005 | 1.0441 | 0.0854 | 0.0001 | 0.0001 | 0.0320 | 0.0127 | 0.0127 | 0.0227 | 0.5232 | 0.4088    | 0.1678    | 0.2050 | 0.6375 | 0.5233 | 0.2050 | 0.1216 | 0.3923 | 0.1122 | 0.4108 | 0.0139 | 0.2 |
| Col-0 S30         | 4.5236 | 1.6820 | 4.7188 | 3.8851 | 2.8944 | 1.3868 | 7.6341 | ND       | 3.5779 | 0.1041 | 0.0720  | 1.2873 | 0.8852 | 0.5374 | 2.7461 | 0.3845 | 18.3947  | 18.3947  | 0.0059  | 0.2007  | 0.0004 | 0.0001 | 0.5067 | 0.0003 | 0.0005 | 4.6446 | 0.0431 | 0.0007 | 0.0005 | 0.0616 | 0.0231 | 0.0488 | 0.0925 | 3.9358 | 1.6048    | 0.4096    | 1.8152 | 4.0747 | 4.9876 | 1.8152 | 0.5524 | 2.1544 | 2.4025 | 1.6164 | 0.0736 | 1.3 |
| SD                | 1.1934 | 0.7760 | 1.1998 | 0.7539 | 0.8340 | 0.2836 | 0.9634 | ND       | 1.1227 | 0.0184 | 0.0235  | 0.3210 | 0.1654 | 0.0508 | 0.9149 | 0.0393 | 3.6541   | 3.6541   | 0.0034  | 0.0146  | 0.0002 | 0.0002 | 0.0734 | 0.0001 | 0.0005 | 0.6041 | 0.0251 | 0.0002 | 0.0002 | 0.0013 | 0.0064 | 0.0136 | 0.0247 | 0.3886 | 0.2178    | 0.0466    | 0.0844 | 0.5895 | 0.9029 | 0.0844 | 0.0689 | 0.1416 | 0.4177 | 0.2566 | 0.0014 | 0.1 |
| Col-0 S180        | 2.7091 | 0.3843 | 2.0675 | 1.5937 | 1.2280 | 1.6543 | 4.6277 | ND       | 1.1987 | 0.0980 | 0.1976  | 0.4748 | 0.4882 | 0.1941 | 1.2193 | 0.2679 | 22.8591  | 22.8591  | 0.0234  | 0.1092  | 0.0007 | 0.0001 | 3.4435 | 0.0009 | 0.0011 | 1.6397 | 0.0414 | 0.0005 | 0.0003 | 0.0483 | 0.0114 | 0.0469 | 0.1036 | 2.0136 | 0.5718    | 0.5375    | 0.8750 | 1.9762 | 2.1163 | 0.8077 | 0.3481 | 1.2293 | 1.0730 | 0.7614 | 0.0713 | 0.5 |
| SD                | 0.7146 | 0.1329 | 0.6327 | 0.3163 | 0.2267 | 0.3715 | 0.9644 | ND       | 0.3117 | 0.0232 | 0.0573  | 0.1705 | 0.1089 | 0.0836 | 0.2938 | 0.0478 | 2.9037   | 2.9037   | 0.0131  | 0.0291  | 0.0006 | 0.0003 | 0.6165 | 0.0011 | 0.0018 | 0.1343 | 0.0203 | 0.0003 | 0.0001 | 0.0197 | 0.0022 | 0.0090 | 0.0431 | 0.2096 | 0.1486    | 0.0388    | 0.1562 | 0.2366 | 0.3482 | 0.0970 | 0.0455 | 0.3237 | 0.5301 | 0.1016 | 0.0147 | 0.0 |
| ipt + DEX Control | 3.7127 | 2.5535 | 5.8987 | 2.4506 | 1.8000 | 1.2530 | 7.3545 | 1.1130   | 3.1592 | 0.1285 | 0.0834  | 1.8163 | 0.5745 | 0.5820 | 2.6409 | 0.3383 | 42.7255  | 18.5187  | 0.0089  | 0.0847  | 0.0005 | 0.0003 | 0.5584 | 0.0007 | 0.0006 | 5.7653 | 0.0346 | 0.0020 | 0.0044 | 0.0632 | 0.0252 | 0.0437 | 0.0759 | 3.2731 | 1.5962    | 0.4090    | 1.9853 | 4.1033 | 3.1315 | 1.6262 | 0.4138 | 2.0777 | 1.5172 | 1.4870 | 0.0532 | 1.4 |
| SD                | 0.8364 | 0.8506 | 3.5507 | 0.8794 | 0.6338 | 0.3713 | 1.4780 | 0.0584   | 1.1976 | 0.0294 | 0.0225  | 0.5559 | 0.0884 | 0.3133 | 1.2341 | 0.0953 | 4.8906   | 4.4849   | 0.0096  | 0.0129  | 0.0004 | 0.0006 | 0.2642 | 0.0009 | 0.0009 | 1.5507 | 0.0009 | 0.0010 | 0.0058 | 0.0166 | 0.0122 | 0.0113 | 0.0165 | 0.7442 | 0.5778    | 0.0907    | 0.6133 | 1.7503 | 0.7498 | 0.3587 | 0.1208 | 0.7077 | 0.3191 | 0.3043 | 0.0092 | 0.5 |
| ipt S30           | 5.1641 | 1.4741 | 6.8464 | 3.4861 | 2.2279 | 1.2207 | 5.7467 | 1.5410   | 2.6039 | 0.0925 | 0.0440  | 1.2458 | 0.8720 | 0.4981 | 2.2429 | 0.3578 | 22.0813  | 22.0813  | 0.0032  | 0.1778  | 0.0002 | 0.0000 | 0.5743 | 0.0004 | 0.0003 | 5.3381 | 0.0466 | 0.0008 | 0.0007 | 0.0827 | 0.0282 | 0.0611 | 0.0728 | 3.6422 | 2.1293    | 0.5036    | 2.1289 | 5.3316 | 3.4314 | 2.0670 | 0.5263 | 2.7492 | 2.0084 | 2.0548 | 0.0786 | 1.6 |
| SD                | 1.0778 | 0.6250 | 2.0262 | 0.4797 | 0.3782 | 0.3824 | 0.8252 | 0.5779   | 0.4197 | 0.0073 | 0.0060  | 0.3337 | 0.0867 | 0.1646 | 0.5876 | 0.0612 | 3.6584   | 3.6584   | 0.0016  | 0.0478  | 0.0000 | 0.0001 | 0.1641 | 0.0001 | 0.0004 | 0.5676 | 0.0160 | 0.0002 | 0.0001 | 0.0175 | 0.0043 | 0.0094 | 0.0089 | 0.3133 | 0.2524    | 0.0748    | 0.3684 | 0.7448 | 0.7729 | 0.2831 | 0.0762 | 0.4433 | 0.6640 | 0.2483 | 0.0185 | 0.3 |
| ipt S180          | 2.8229 | 0.5228 | 2.9386 | 2.0169 | 1.3358 | 1.7366 | 6.7102 | 1.4902   | 1.2660 | 0.1114 | 0.1435  | 0.5360 | 0.5044 | 0.1179 | 1.2075 | 0.2700 | 32.2148  | 32.2148  | 0.0053  | 0.1008  | 0.0004 | 0.0001 | 2.3760 | 0.0005 | 0.0025 | 1.9759 | 1.9515 | 0.0003 | 0.0003 | 0.0614 | 0.0110 | 0.0497 | 0.1215 | 2.7521 | 1.0349    | 0.5497    | 1.1450 | 2.8870 | 2.3302 | 1.0170 | 0.3502 | 1.3700 | 1.4740 | 0.9031 | 0.0694 | 0.7 |
| SD                | 0.5401 | 0.1281 | 0.5766 | 0.2037 | 0.2678 | 0.1397 | 0.8566 | 0.7678   | 0.2184 | 0.0223 | 0.0299  | 0.1109 | 0.1119 | 0.0313 | 0.2274 | 0.0448 | 4.3674   | 4.3674   | 0.0031  | 0.0146  | 0.0001 | 0.0002 | 0.5632 | 0.0005 | 0.0041 | 0.0738 | 0.3903 | 0.0001 | 0.0002 | 0.0176 | 0.0020 | 0.0062 | 0.0303 | 0.0868 | 0.1197    | 0.1357    | 0.3403 | 0.7297 | 0.3494 | 0.2745 | 0.0690 | 0.5926 | 0.4423 | 0.2268 | 0.0144 | 0.1 |
| Col-0 SR30        | 2.3573 | 1.1269 | 2.5141 | 1.7116 | 1.0141 | 0.3539 | 1.7219 | ND       | 1.4821 | 0.0490 | 0.2657  | 0.8014 | 0.2848 | 0.2518 | 0.5307 | 0.1413 | 17.2136  | 17.2136  | 0.0187  | 0.0971  | 0.0005 | 0.0002 | 0.4088 | 0.0011 | 0.0005 | 2.8956 | 0.0004 | 0.0005 | 0.0008 | 0.0484 | 0.0195 | 0.0337 | 0.1532 | 2.5228 | 0.5830    | 0.1042    | 1.1545 | 2.5947 | 2.0461 | 1.0547 | 0.3121 | 1.4023 | 1.3191 | 1.0593 | 0.0411 | 0.9 |
| SD                | 0.6183 | 0.1498 | 0.5509 | 0.2177 | 0.1236 | 0.0398 | 0.0597 | ND       | 0.1548 | 0.0023 | 0.1039  | 0.0631 | 0.1083 | 0.0745 | 0.1003 | 0.0108 | 2.3277   | 2.3277   | 0.0061  | 0.0251  | 0.0008 | 0.0003 | 0.0601 | 0.0008 | 0.0004 | 0.3552 | 0.0001 | 0.0000 | 0.0002 | 0.0171 | 0.0014 | 0.0052 | 0.0587 | 0.3359 | 0.1194    | 0.0127    | 0.1132 | 0.2641 | 0.0576 | 0.1872 | 0.0439 | 0.0913 | 0.5656 | 0.0811 | 0.0102 | 0.1 |
| Col-0 SR30        | 2.0716 | 1.3453 | 1.9635 | 1.4046 | 0.8288 | 0.4070 | 1.2298 | ND       | 0.9534 | 0.0476 | 0.0599  | 1.0068 | 0.2510 | 0.1259 | 0.3984 | 0.1463 | 12.1313  | 12.1313  | 0.0218  | 0.1224  | 0.0002 | 0.0001 | 0.2605 | 0.0006 | 0.0441 | 2.2012 | 0.0002 | 0.0008 | 0.0004 | 0.0546 | 0.0223 | 0.0391 | 0.2413 | 1.8380 | 0.3138    | 0.0564    | 0.9233 | 1.5591 | 1.7913 | 1.1022 | 0.3694 | 1.4184 | 0.4978 | 1.1617 | 0.0489 | 0.6 |
| SD                | 0.3350 | 0.3280 | 0.6243 | 0.3406 | 0.1687 | 0.0701 | 0.0839 | ND       | 0.2536 | 0.0272 | 0.0137  | 0.3084 | 0.0700 | 0.0537 | 0.2007 | 0.0185 | 2.3454   | 2.3454   | 0.0091  | 0.0454  | 0.0003 | 0.0001 | 0.0630 | 0.0005 | 0.0763 | 0.2807 | 0.0000 | 0.0003 | 0.0001 | 0.0055 | 0.0025 | 0.0024 | 0.0778 | 0.4703 | 0.1055    | 0.0187    | 0.2130 | 0.3912 | 0.6373 | 0.1045 | 0.0686 | 0.3509 | 0.1419 | 0.2949 | 0.0049 | 0.0 |
| ipt SR30          | 2.7080 | 1.3033 | 3.5189 | 2.0385 | 1.0596 | 0.4514 | 2.3646 | 0.7243   | 1.6611 |        |         |        |        |        |        |        |          |          |         |         |        |        |        |        |        |        |        |        |        |        |        |        |        |        |           |           |        |        |        |        |        |        |        |        |        |     |

|                     |        |        |        |        |        |        |        |        |        |        |        |        |        |        |        |        |         |         |        |        |        |        |        |        |        |        |        |        |        |        |        |        |        |        |        |        |        |        |        |        |        |        |        |        |        |     |
|---------------------|--------|--------|--------|--------|--------|--------|--------|--------|--------|--------|--------|--------|--------|--------|--------|--------|---------|---------|--------|--------|--------|--------|--------|--------|--------|--------|--------|--------|--------|--------|--------|--------|--------|--------|--------|--------|--------|--------|--------|--------|--------|--------|--------|--------|--------|-----|
| SD                  | 1.0094 | 0.4730 | 0.5509 | 0.4948 | 0.2821 | 0.1118 | 0.2954 | 0.1918 | 0.0167 | 0.0165 | 0.0632 | 0.2840 | 0.0781 | 0.1010 | 0.1107 | 0.0223 | 0.2346  | 0.2346  | 0.0082 | 0.0115 | 0.0004 | 0.0003 | 0.0086 | 0.0003 | 0.1231 | 0.2435 | 0.0001 | 0.0003 | 0.0003 | 0.0067 | 0.0089 | 0.0102 | 0.0501 | 0.5098 | 0.0557 | 0.0110 | 0.2830 | 0.0724 | 0.4150 | 0.1068 | 0.0461 | 0.2633 | 0.1451 | 0.1617 | 0.0128 | 0.1 |
| Col-0<br>R30        | 5.2084 | 1.5633 | 4.2577 | 2.4661 | 1.7868 | 0.4088 | 2.4471 | ND     | 2.7086 | 0.1019 | 0.4313 | 1.3881 | 0.5842 | 0.3820 | 1.2614 | 0.2389 | 53.2040 | 53.2040 | 0.0310 | 0.1660 | 0.0006 | 0.0002 | 0.4166 | 0.0012 | 0.0002 | 2.7813 | 0.2150 | 0.0004 | 0.0008 | 0.0768 | 0.0210 | 0.0399 | 0.2285 | 4.2300 | 0.7916 | 0.1556 | 1.1453 | 2.8240 | 2.1154 | 1.3027 | 0.3503 | 2.0708 | 1.2841 | 1.0618 | 0.0573 | 1.0 |
| SD                  | 1.9378 | 0.4042 | 1.6336 | 0.7962 | 0.3505 | 0.0605 | 0.4458 | ND     | 0.8086 | 0.0189 | 0.1707 | 0.4176 | 0.1428 | 0.0986 | 0.2725 | 0.0711 | 9.0585  | 9.0585  | 0.0085 | 0.0477 | 0.0003 | 0.0005 | 0.0999 | 0.0004 | 0.0000 | 0.5608 | 0.1125 | 0.0002 | 0.0002 | 0.0223 | 0.0077 | 0.0067 | 0.0493 | 0.9733 | 0.2074 | 0.0232 | 0.2094 | 0.5200 | 0.2951 | 0.3583 | 0.0735 | 0.2725 | 0.6713 | 0.1195 | 0.0147 | 0.2 |
| Col-0<br>R180       | 3.1073 | 1.4572 | 4.2572 | 1.8139 | 1.7924 | 0.3820 | 1.6830 | ND     | 2.2737 | 0.0953 | 0.1787 | 1.9945 | 0.3323 | 0.2690 | 0.6379 | 0.1936 | 43.3290 | 43.3290 | 0.0200 | 0.1190 | 0.0002 | 0.0001 | 0.3917 | 0.0016 | 0.0002 | 2.8020 | 0.1411 | 0.0008 | 0.0007 | 0.0780 | 0.0244 | 0.0529 | 0.1360 | 3.8937 | 0.4590 | 0.1018 | 1.1677 | 3.1071 | 2.2939 | 1.1509 | 0.3387 | 1.8960 | 0.4795 | 1.1678 | 0.0630 | 0.9 |
| SD                  | 0.4772 | 0.5312 | 0.7410 | 0.1282 | 0.3127 | 0.0980 | 0.3507 | ND     | 0.1637 | 0.0145 | 0.0096 | 0.5747 | 0.0217 | 0.0875 | 0.1063 | 0.0444 | 8.4996  | 8.4996  | 0.0124 | 0.0149 | 0.0002 | 0.0001 | 0.0550 | 0.0007 | 0.0000 | 0.3747 | 0.0082 | 0.0001 | 0.0002 | 0.0124 | 0.0034 | 0.0083 | 0.0373 | 0.4604 | 0.1290 | 0.0306 | 0.2275 | 0.5874 | 0.3795 | 0.1975 | 0.0162 | 0.1927 | 0.0904 | 0.1707 | 0.0106 | 0.1 |
| <i>ipt</i> SR30     | 2.7982 | 0.8623 | 3.6032 | 1.9612 | 1.5629 | 0.4123 | 2.1406 | 0.7852 | 2.1156 | 0.0702 | 1.0217 | 1.4081 | 0.5080 | 0.3377 | 0.9718 | 0.1179 | 47.3582 | 47.3582 | 0.0192 | 0.1052 | 0.0003 | 0.0001 | 0.9537 | 0.0006 | 0.0001 | 2.3061 | 0.0685 | 0.0005 | 0.0020 | 0.0604 | 0.0165 | 0.0319 | 0.1221 | 3.5365 | 0.5919 | 0.1601 | 1.0536 | 2.4226 | 1.9337 | 1.0173 | 0.2985 | 1.6837 | 0.8419 | 0.9699 | 0.0452 | 0.8 |
| SD                  | 1.3847 | 0.2093 | 1.0851 | 0.5201 | 0.2361 | 0.0812 | 0.4130 | 0.1281 | 0.4003 | 0.0077 | 0.2056 | 0.2301 | 0.1466 | 0.0561 | 0.1782 | 0.0408 | 5.5620  | 5.5620  | 0.0036 | 0.0364 | 0.0004 | 0.0002 | 0.2141 | 0.0000 | 0.0002 | 0.2850 | 0.0243 | 0.0001 | 0.0004 | 0.0045 | 0.0020 | 0.0038 | 0.0505 | 0.4802 | 0.0814 | 0.0456 | 0.1866 | 0.4557 | 0.1967 | 0.1280 | 0.0226 | 0.1951 | 0.1288 | 0.1216 | 0.0076 | 0.0 |
| <i>ipt</i><br>SR180 | 1.9287 | 0.6929 | 2.2705 | 1.0133 | 0.7558 | 0.3140 | 1.0359 | 1.1175 | 1.2184 | 0.0365 | 0.2086 | 1.6414 | 0.4818 | 0.2786 | 0.5274 | 0.1369 | 19.5687 | 19.5687 | 0.0044 | 0.1114 | 0.0564 | 0.0005 | 0.4626 | 0.0030 | 0.0001 | 1.8583 | 0.0871 | 0.0003 | 0.0009 | 0.0552 | 0.0166 | 0.0368 | 0.0584 | 2.5383 | 0.3530 | 0.1365 | 0.7432 | 1.9978 | 1.3847 | 0.7432 | 0.2512 | 1.5763 | 0.4009 | 0.7694 | 0.0433 | 0.5 |
| SD                  | 0.9852 | 0.1191 | 0.3447 | 0.0854 | 0.2082 | 0.0949 | 0.1863 | 0.3079 | 0.4189 | 0.0151 | 0.0062 | 0.7475 | 0.3796 | 0.1487 | 0.1455 | 0.0806 | 6.4372  | 6.4372  | 0.0007 | 0.0299 | 0.0949 | 0.0011 | 0.1362 | 0.0010 | 0.0000 | 0.5391 | 0.0181 | 0.0001 | 0.0003 | 0.0152 | 0.0026 | 0.0092 | 0.0180 | 0.1118 | 0.1222 | 0.0269 | 0.1215 | 0.3314 | 0.7442 | 0.1215 | 0.0330 | 0.4673 | 0.1475 | 0.1704 | 0.0064 | 0.1 |



**Table S4.** Complete list of identified proteins regulated by individual HS treatments in wild-type (Col-0) and activated *ipt* transformant leaves. Molecular Weight (MW; theoretical, theo; experimental, exp.); Isoelectric point (pI; theoretical, theo; experimental, exp.); Relative spot volume (V%); Relative spot volume change.

| Spot N. | AGI (TAIR) | Name (UniProt)                                                    | Score | MW            | pI        | Wild type (Col-0)         |              |                           |             |                          |             | Plants with increased CK levels (11.5) |        |                            |             |                          |             |             |             |
|---------|------------|-------------------------------------------------------------------|-------|---------------|-----------|---------------------------|--------------|---------------------------|-------------|--------------------------|-------------|----------------------------------------|--------|----------------------------|-------------|--------------------------|-------------|-------------|-------------|
|         |            |                                                                   |       |               |           | 40° C heat only on shoots |              | 40° C heat to shoot&roots |             | 40° C heat only to roots |             | 40° C heat only to shoots              |        | 40° C heat to shoots&roots |             | 40° C heat only to roots |             |             |             |
|         |            |                                                                   |       |               |           | (theo./exp.)              | (theo./exp.) | V%                        | 30 min      | 180 min                  | 30 min      | 180 min                                | 30 min | 180 min                    | V%          | 30 min                   | 180 min     | 30 min      | 180 min     |
| S01     | At4g02520  | Glutathione S-transferase PM24                                    | 138   | 24.1 / 21.5   | 5.9 / 6.5 | 0.34                      | 1.08 ± 0.04  | 1.31 ± 0.16               | 0.89 ± 0.02 | 0.90 ± 0.04              | 0.84 ± 0.04 | 0.85 ± 0.09                            | 0.44   | 1.07 ± 0.12                | 0.91 ± 0.09 | 1.12 ± 0.07              | 0.75 ± 0.02 | 0.88 ± 0.02 | 0.78 ± 0.07 |
| S02     | At3g28940  | Arabidopsis thaliana (thale cress) AIG2 protein-like              | 205   | 19.5 / 17.0   | 5.0 / 5.1 | 0.08                      | 2.42 ± 0.03  | 2.44 ± 0.16               | 1.04 ± 0.04 | 1.24 ± 0.01              | 0.81 ± 0.01 | 1.23 ± 0.05                            | 0.06   | 1.08 ± 0.06                | 0.90 ± 0.05 | 1.26 ± 0.04              | 1.05 ± 0.11 | 1.52 ± 0.01 | 1.60 ± 0.03 |
| S03     | At3g14415  | Peroxisomal (S)-2-hydroxy-acid oxidase GLO2                       | 305   | 40.3 / 38.0   | 9.0 / 9.0 | 0.35                      | 0.50 ± 0.13  | 0.50 ± 0.09               | 1.14 ± 0.09 | 1.18 ± 0.01              | 0.69 ± 0.02 | 0.96 ± 0.04                            | 0.25   | 0.42 ± 0.07                | 0.50 ± 0.13 | 0.98 ± 0.03              | 1.09 ± 0.03 | 0.45 ± 0.04 | 0.46 ± 0.02 |
| S04     | At4g33010  | Glycine dehydrogenase [decarboxylating] 2, mitochondrial          | 408   | 112.9 / 105.0 | 6.5 / 6.4 | 0.17                      | 0.77 ± 0.13  | 0.51 ± 0.02               | 0.24 ± 0.00 | 0.52 ± 0.06              | 0.51 ± 0.09 | 0.69 ± 0.04                            | 0.16   | 0.39 ± 0.04                | 0.50 ± 0.09 | 1.81 ± 0.08              | 2.06 ± 0.04 | 1.11 ± 0.07 | 0.86 ± 0.07 |
| S05     | At3g55440  | Triosephosphate isomerase, cytosolic                              | 401   | 27.5 / 22.0   | 5.4 / 5.5 | 0.59                      | 0.99 ± 0.10  | 0.89 ± 0.23               | 0.89 ± 0.10 | 1.09 ± 0.11              | 2.01 ± 0.06 | 1.27 ± 0.02                            | 0.42   | 0.82 ± 0.09                | 0.69 ± 0.01 | 1.25 ± 0.04              | 0.96 ± 0.04 | 1.11 ± 0.02 | 1.47 ± 0.06 |
| S06     | At1g63770  | Putative aminopeptidase                                           | 506   | 99.2 / 98.0   | 5.4 / 5.6 | 0.15                      | 0.77 ± 0.04  | 0.49 ± 0.04               | 1.02 ± 0.07 | 1.05 ± 0.04              | 0.44 ± 0.06 | 0.49 ± 0.04                            | 0.10   | 0.38 ± 0.04                | 0.42 ± 0.02 | 0.11 ± 0.00              | 0.92 ± 0.16 | 3.88 ± 0.01 | 1.69 ± 0.09 |
| S07     | At3g60750  | Putative transketolase                                            | 374   | 80.0 / 73.0   | 5.9 / 5.5 | 0.66                      | 0.85 ± 0.08  | 0.57 ± 0.24               | 1.01 ± 0.03 | 0.95 ± 0.02              | 0.79 ± 0.01 | 0.78 ± 0.07                            | 0.35   | 0.61 ± 0.07                | 0.79 ± 0.09 | 0.10 ± 0.02              | 0.85 ± 0.08 | 1.48 ± 0.05 | 1.23 ± 0.04 |
| S08     | At5g59880  | Actin-depolymerizing factor 3                                     | 314   | 15.9 / 19.0   | 5.9 / 6.0 | 0.18                      | 1.73 ± 0.02  | 2.19 ± 0.09               | 0.98 ± 0.11 | 1.42 ± 0.08              | 1.00 ± 0.06 | 1.16 ± 0.10                            | 0.11   | 0.89 ± 0.04                | 0.75 ± 0.05 | 1.23 ± 0.01              | 1.13 ± 0.05 | 0.98 ± 0.05 | 0.91 ± 0.09 |
| S09     | At1g10960  | Ferredoxin-1, chloroplastic                                       | 183   | 15.9 / 19.0   | 4.4 / 4.6 | 0.14                      | 1.48 ± 0.02  | 1.97 ± 0.08               | 1.14 ± 0.04 | 1.34 ± 0.13              | 0.92 ± 0.05 | 0.84 ± 0.09                            | 0.16   | 1.01 ± 0.04                | 1.18 ± 0.04 | 1.05 ± 0.03              | 1.25 ± 0.10 | 0.44 ± 0.04 | 0.35 ± 0.04 |
| S10     | At5g62530  | Delta-1-pyrroline-5-carboxylate dehydrogenase 12A1, mitochondrial | 124   | 61.8 / 58.0   | 6.3 / 6.2 | 0.03                      | 0.81 ± 0.01  | 2.51 ± 0.14               | 1.07 ± 0.01 | 3.82 ± 0.11              | 0.23 ± 0.02 | 0.45 ± 0.01                            | 0.02   | 0.87 ± 0.00                | 0.59 ± 0.00 | 0.39 ± 0.01              | 0.46 ± 0.01 | 0.15 ± 0.15 | 2.84 ± 0.07 |
| S11     | At2g30860  | Glutathione S-transferase PHI 9                                   | 281   | 24.1 / 21.5   | 6.2 / 6.7 | 0.30                      | 1.69 ± 0.04  | 1.79 ± 0.14               | 1.31 ± 0.08 | 2.25 ± 0.06              | 0.81 ± 0.04 | 0.92 ± 0.06                            | 0.37   | 1.01 ± 0.06                | 1.49 ± 0.08 | 0.76 ± 0.09              | 1.05 ± 0.04 | 1.07 ± 0.03 | 0.80 ± 0.06 |
| S12     | N/A        | <b>Not identified</b>                                             | N/A   | N/A / 18.5    | N/A / 5.9 | 0.20                      | 1.06 ± 0.01  | 1.81 ± 0.07               | 1.04 ± 0.07 | 1.2 ± 0.06               | 1.40 ± 0.03 | 1.47 ± 0.02                            | 0.15   | 0.99 ± 0.08                | 0.66 ± 0.04 | 0.95 ± 0.02              | 0.97 ± 0.09 | 1.29 ± 0.02 | 1.15 ± 0.01 |
| S13     | At5g63310  | Nucleoside diphosphate kinase II, chloroplastic                   | 99    | 25.6 / 16.5   | 9.1 / 5.6 | 0.20                      | 1.27 ± 0.03  | 1.73 ± 0.10               | 0.88 ± 0.04 | 1.32 ± 0.07              | 1.25 ± 0.04 | 1.14 ± 0.05                            | 0.12   | 0.84 ± 0.04                | 0.80 ± 0.06 | 0.85 ± 0.03              | 0.59 ± 0.01 | 1.09 ± 0.02 | 0.90 ± 0.06 |
| S14     | At5g54770  | Thiazole biosynthetic enzyme, chloroplastic                       | 185   | 36.7 / 29.0   | 5.8 / 5.7 | 0.09                      | 1.16 ± 0.02  | 1.41 ± 0.04               | 1.04 ± 0.13 | 1.38 ± 0.02              | 1.65 ± 0.05 | 1.79 ± 0.04                            | 0.07   | 0.83 ± 0.01                | 0.83 ± 0.02 | 1.01 ± 0.03              | 1.21 ± 0.04 | 0.95 ± 0.06 | 1.29 ± 0.02 |
| S15     | At5g53490  | Thylakoid lumenal 17.4 kDa protein, chloroplastic                 | 240   | 25.6 / 15.5   | 6.0 / 5.4 | 0.16                      | 1.03 ± 0.07  | 0.98 ± 0.07               | 1.08 ± 0.10 | 0.88 ± 0.05              | 1.54 ± 0.02 | 0.59 ± 0.03                            | 0.10   | 0.98 ± 0.05                | 0.66 ± 0.02 | 0.03 ± 0.01              | 1.09 ± 0.05 | 1.20 ± 0.02 | 0.95 ± 0.03 |
| S16     | At4g25100  | Superoxide dismutase [Fe], chloroplastic                          | 139   | 23.8 / 19.5   | 6.6 / 6.2 | 0.50                      | 1.62 ± 0.06  | 2.46 ± 0.27               | 0.95 ± 0.02 | 0.95 ± 0.02              | 1.02 ± 0.06 | 1.07 ± 0.08                            | 0.34   | 0.94 ± 0.15                | 0.47 ± 0.06 | 0.86 ± 0.09              | 0.75 ± 0.14 | 1.43 ± 0.06 | 1.49 ± 0.05 |
| S17     | At3g52960  | Peroxioredoxin-2E, chloroplastic                                  | 183   | 24.7 / 16.5   | 9.7 / 5.2 | 0.07                      | 1.46 ± 0.05  | 1.59 ± 0.15               | 0.95 ± 0.04 | 1.50 ± 0.03              | 1.29 ± 0.02 | 1.15 ± 0.05                            | 0.08   | 1.41 ± 0.06                | 1.02 ± 0.07 | 1.12 ± 0.05              | 1.40 ± 0.02 | 1.26 ± 0.03 | 0.71 ± 0.01 |
| S18     | At2g28190  | Superoxide dismutase [Cu-Zn], chloroplastic                       | 163   | 22.2 / 17.5   | 6.5 / 5.5 | 0.01                      | 1.58 ± 0.04  | 1.51 ± 0.13               | 1.02 ± 0.07 | 1.42 ± 0.05              | 0.79 ± 0.03 | 1.13 ± 0.02                            | 0.02   | 1.35 ± 0.09                | 1.11 ± 0.04 | 0.98 ± 0.05              | 1.40 ± 0.01 | 1.22 ± 0.23 | 1.32 ± 0.01 |
| S19     | At1g48030  | Dihydrolipoyl dehydrogenase 1, mitochondrial                      | 253   | 54.0 / 58.0   | 7.0 / 6.7 | 0.03                      | 1.06 ± 0.01  | 1.25 ± 0.02               | 1.21 ± 0.07 | 0.86 ± 0.04              | 1.09 ± 0.07 | 1.76 ± 0.04                            | 0.02   | 0.41 ± 0.01                | 0.54 ± 0.00 | 0.89 ± 0.02              | 0.94 ± 0.03 | 1.03 ± 0.01 | 1.11 ± 0.06 |
| S20     | At1g55480  | GAN                                                               | 131   | 37.4 / 33.0   | 8.2 / 5.4 | 0.06                      | 0.84 ± 0.01  | 1.09 ± 0.01               | 0.91 ± 0.08 | 1.11 ± 0.03              | 2.25 ± 0.02 | 0.71 ± 0.11                            | 0.03   | 0.51 ± 0.02                | 0.35 ± 0.02 | 0.97 ± 0.03              | 0.75 ± 0.05 | 1.29 ± 0.04 | 1.71 ± 0.10 |
| S21     | AtCg00490  | Ribulose biphosphate carboxylase large chain                      | 578   | 53.0 / 51.0   | 5.9 / 6.2 | 1.61                      | 0.76 ± 0.01  | 0.62 ± 0.02               | 1.09 ± 0.09 | 1.32 ± 0.02              | 0.84 ± 0.01 | 0.75 ± 0.00                            | 2.29   | 1.63 ± 0.03                | 1.12 ± 0.02 | 0.90 ± 0.03              | 1.09 ± 0.09 | 0.78 ± 0.04 | 0.87 ± 0.05 |
| S22     | At1g06680  | Oxygen-evolving enhancer protein 2-1, chloroplastic               | 209   | 28.1 / 24.0   | 6.9 / 5.4 | 0.16                      | 1.28 ± 0.03  | 1.32 ± 0.06               | 1.24 ± 0.01 | 0.86 ± 0.03              | 1.27 ± 0.01 | 1.21 ± 0.01                            | 0.24   | 1.71 ± 0.03                | 2.20 ± 0.03 | 1.3 ± 0.11               | 1.5 ± 0.01  | 0.92 ± 0.03 | 0.78 ± 0.09 |
| S23     | AT2G21660  | CCR2 (COLD, CIRCADIAN RHYTHM, AND RNA BINDING 2)                  | 66    | 14.9 / 16.5   | 5.1 / 5.5 | 0.18                      | 0.94 ± 0.03  | 0.60 ± 0.05               | 0.67 ± 0.03 | 0.98 ± 0.04              | 0.65 ± 0.02 | 0.66 ± 0.01                            | 0.08   | 1.00 ± 0.04                | 0.77 ± 0.07 | 1.17 ± 0.08              | 2.05 ± 0.05 | 2.36 ± 0.01 | 2.23 ± 0.02 |
| S24     | At4g28520  | 12S seed storage protein CRU1 (Cruciferin 1 or C)                 | 232   | 58.2 / 59.0   | 6.5 / 6.5 | 0.24                      | 0.96 ± 0.01  | 1.48 ± 0.26               | 1.11 ± 0.02 | 1.10 ± 0.07              | 0.57 ± 0.09 | 0.90 ± 0.10                            | 0.34   | 1.36 ± 0.02                | 2.21 ± 0.02 | 0.98 ± 0.01              | 0.75 ± 0.01 | 1.39 ± 0.02 | 1.32 ± 0.05 |

|     |           |                                                                       |     |              |           |      |                    |                    |                    |                    |                    |                    |      |                    |                    |                    |                    |                    |                    |
|-----|-----------|-----------------------------------------------------------------------|-----|--------------|-----------|------|--------------------|--------------------|--------------------|--------------------|--------------------|--------------------|------|--------------------|--------------------|--------------------|--------------------|--------------------|--------------------|
| S25 | At1g72150 | Patellin-1                                                            | 304 | 64.0 / 105.0 | 4.8 / 5.2 | 0.22 | <b>0.76 ± 0.04</b> | <b>0.53 ± 0.07</b> | 1.2 ± 0.05         | 0.96 ± 0.04        | <b>0.71 ± 0.08</b> | 0.96 ± 0.02        | 0.18 | <b>0.76 ± 0.07</b> | <b>0.83 ± 0.04</b> | 1.02 ± 0.06        | 1.17 ± 0.07        | 1.51 ± 0.09        | 1.10 ± 0.01        |
| S26 | At1g20020 | Ferredoxin--NADP reductase, leaf isozyme 2, chloroplastic             | 263 | 41.2 / 30.0  | 8.5 / 6.6 | 0.26 | <b>0.99 ± 0.02</b> | <b>1.47 ± 0.06</b> | 1.01 ± 0.01        | 1.3 ± 0.03         | <b>0.94 ± 0.09</b> | <b>1.20 ± 0.04</b> | 0.30 | <b>0.55 ± 0.05</b> | <b>0.55 ± 0.03</b> | <b>0.94 ± 0.03</b> | 1.21 ± 0.01        | 1.11 ± 0.07        | 1.08 ± 0.02        |
| S27 | At4g14880 | Cysteine synthase                                                     | 239 | 33.8 / 30.0  | 5.9 / 6.2 | 0.20 | <b>1.55 ± 0.06</b> | <b>1.03 ± 0.03</b> | <b>0.62 ± 0.03</b> | <b>0.59 ± 0.03</b> | <b>1.05 ± 0.08</b> | <b>1.02 ± 0.02</b> | 0.05 | <b>0.71 ± 0.02</b> | <b>0.41 ± 0.02</b> | <b>0.71 ± 0.02</b> | <b>0.50 ± 0.01</b> | <b>1.47 ± 0.05</b> | <b>1.25 ± 0.01</b> |
| S28 | At5g23120 | Photosystem II stability/assembly factor HCF136, chloroplastic        | 395 | 44.1 / 36.5  | 6.8 / 5.4 | 0.02 | <b>0.82 ± 0.09</b> | <b>0.90 ± 0.11</b> | 1.2 ± 0.02         | 1.09 ± 0.04        | <b>1.83 ± 0.05</b> | <b>1.72 ± 0.02</b> | 0.06 | <b>1.02 ± 0.02</b> | <b>1.23 ± 0.10</b> | 1.11 ± 0.08        | 1.2 ± 0.03         | <b>1.02 ± 0.01</b> | <b>1.24 ± 0.00</b> |
| S29 | At5g04590 | Sulphite reductase                                                    | 292 | 72.0 / 65.0  | 8.5 / 7.7 | 0.42 | <b>0.48 ± 0.01</b> | <b>0.48 ± 0.01</b> | 0.52 ± 0.03        | 0.95 ± 0.04        | <b>0.67 ± 0.03</b> | <b>0.50 ± 0.05</b> | 0.20 | <b>0.99 ± 0.03</b> | <b>0.57 ± 0.01</b> | 1.24 ± 0.05        | 1.21 ± 0.03        | <b>0.84 ± 0.10</b> | <b>0.62 ± 0.08</b> |
| S30 | At5g66190 | Ferredoxin--NADP reductase, leaf isozyme 1, chloroplastic             | 116 | 40.3 / 30.0  | 8.3 / 5.5 | 0.31 | <b>1.46 ± 0.04</b> | <b>1.46 ± 0.09</b> | 1.31 ± 0.03        | 0.65 ± 0.02        | <b>1.41 ± 0.03</b> | <b>1.17 ± 0.04</b> | 0.13 | <b>0.54 ± 0.03</b> | <b>0.48 ± 0.02</b> | <b>0.93 ± 0.03</b> | <b>0.48 ± 0.01</b> | 1.76 ± 0.02        | 2.18 ± 0.02        |
| S31 | At3g14930 | Uroporphyrinogen decarboxylase 1, chloroplastic                       | 274 | 46.3 / 42.0  | 6.6 / 6.6 | 0.29 | <b>1.65 ± 0.06</b> | <b>1.16 ± 0.07</b> | 1.21 ± 0.08        | 1.07 ± 0.06        | <b>0.68 ± 0.06</b> | <b>0.89 ± 0.05</b> | 0.25 | 1.51 ± 0.07        | 1.77 ± 0.05        | <b>0.96 ± 0.03</b> | 1.04 ± 0.05        | <b>0.85 ± 0.09</b> | <b>0.78 ± 0.08</b> |
| S32 | At2g13360 | Serine--glyoxylate aminotransferase                                   | 543 | 44.2 / 45.0  | 7.7 / 8.1 | 0.05 | <b>1.14 ± 0.04</b> | <b>0.87 ± 0.04</b> | 1.09 ± 0.03        | 1.12 ± 0.04        | <b>0.38 ± 0.04</b> | <b>0.77 ± 0.01</b> | 0.05 | <b>1.00 ± 0.06</b> | <b>1.33 ± 0.05</b> | <b>0.89 ± 0.01</b> | <b>0.98 ± 0.05</b> | 1.07 ± 0.02        | <b>0.83 ± 0.02</b> |
| S33 | At1g09340 | Uncharacterized protein At1g09340, chloroplastic                      | 362 | 42.6 / 36.5  | 8.2 / 6.9 | 0.42 | <b>0.99 ± 0.03</b> | <b>0.66 ± 0.17</b> | <b>0.78 ± 0.06</b> | <b>0.72 ± 0.04</b> | <b>0.86 ± 0.06</b> | <b>1.06 ± 0.07</b> | 0.16 | <b>0.44 ± 0.06</b> | <b>0.37 ± 0.05</b> | <b>0.66 ± 0.09</b> | 1.04 ± 0.06        | 1.08 ± 0.06        | 1.34 ± 0.11        |
| S34 | At2g28000 | RuBisCO large subunit-binding protein subunit alpha, chloroplastic    | 113 | 62.1 / 58.0  | 5.8 / 5.2 | 0.12 | <b>0.65 ± 0.02</b> | <b>0.49 ± 0.05</b> | 1.03 ± 0.05        | 0.94 ± 0.09        | <b>0.40 ± 0.03</b> | <b>0.71 ± 0.05</b> | 0.25 | <b>1.00 ± 0.03</b> | <b>1.97 ± 0.06</b> | <b>1.13 ± 0.02</b> | <b>0.91 ± 0.03</b> | <b>0.99 ± 0.09</b> | <b>0.85 ± 0.17</b> |
| S35 | At2g21330 | Fructose-bisphosphate aldolase                                        | 155 | 33.3 / 34.0  | 6.3 / 5.4 | 0.17 | <b>0.96 ± 0.06</b> | <b>1.27 ± 0.09</b> | <b>1.08 ± 0.04</b> | <b>1.13 ± 0.04</b> | <b>1.43 ± 0.05</b> | <b>1.60 ± 0.02</b> | 0.14 | <b>0.69 ± 0.04</b> | <b>0.51 ± 0.04</b> | 1.07 ± 0.16        | 1.2 ± 0.04         | <b>1.37 ± 0.07</b> | <b>1.14 ± 0.07</b> |
| S36 | At5g17920 | 5-methyltetrahydropteroyltriglutamate--homocysteine methyltransferase | 677 | 84.4 / 75.0  | 6.9 / 6.6 | 1.11 | <b>0.93 ± 0.15</b> | <b>0.80 ± 0.09</b> | 0.27 ± 0.02        | 0.45 ± 0.07        | <b>0.31 ± 0.05</b> | <b>0.82 ± 0.03</b> | 0.79 | <b>0.46 ± 0.02</b> | <b>0.60 ± 0.02</b> | 2.76 ± 0.17        | 2.67 ± 0.06        | 1.29 ± 0.07        | <b>0.99 ± 0.01</b> |
| S37 | At3g14210 | GDSL esterase/lipase ESM1                                             | 481 | 44.1 / 45.0  | 7.8 / 7.3 | 1.61 | <b>1.01 ± 0.32</b> | <b>1.07 ± 0.66</b> | <b>0.98 ± 0.04</b> | <b>1.18 ± 0.07</b> | <b>1.08 ± 0.05</b> | <b>1.31 ± 0.07</b> | 1.85 | <b>0.89 ± 0.05</b> | <b>0.74 ± 0.04</b> | <b>0.74 ± 0.04</b> | 1.14 ± 0.01        | <b>0.91 ± 0.23</b> | <b>0.81 ± 0.01</b> |
| S38 | At1g77510 | Protein disulfide isomerase-like 1-2                                  | 109 | 56.4 / 65.0  | 4.9 / 4.2 | 0.25 | <b>1.86 ± 0.01</b> | <b>2.07 ± 0.05</b> | <b>1.08 ± 0.07</b> | <b>0.92 ± 0.08</b> | <b>0.75 ± 0.01</b> | <b>1.36 ± 0.03</b> | 0.30 | 1.79 ± 0.01        | 1.57 ± 0.01        | <b>1.18 ± 0.01</b> | <b>0.88 ± 0.03</b> | 1.07 ± 0.03        | <b>0.74 ± 0.06</b> |
| S39 | At1g68010 | Hydroxypyruvate reductase                                             | 356 | 42.2 / 38.0  | 6.7 / 7.2 | 0.43 | <b>0.78 ± 0.06</b> | <b>1.03 ± 0.09</b> | 1.13 ± 0.04        | 1.20 ± 0.02        | <b>0.65 ± 0.07</b> | <b>0.89 ± 0.10</b> | 0.46 | <b>0.61 ± 0.01</b> | <b>0.55 ± 0.02</b> | <b>1.05 ± 0.03</b> | <b>0.99 ± 0.08</b> | <b>1.46 ± 0.08</b> | <b>1.19 ± 0.05</b> |
| S40 | At5g11670 | Malic enzyme                                                          | 568 | 64.4 / 65.0  | 6.1 / 6.3 | 0.29 | <b>1.28 ± 0.01</b> | <b>1.12 ± 0.13</b> | 0.95 ± 0.05        | 1.05 ± 0.13        | <b>0.85 ± 0.05</b> | <b>1.22 ± 0.06</b> | 0.20 | <b>0.57 ± 0.03</b> | <b>0.64 ± 0.03</b> | 1.24 ± 0.01        | <b>0.94 ± 0.03</b> | 1.58 ± 0.01        | 1.05 ± 0.07        |
| S41 | At2g37660 | Uncharacterized protein At2g37660, chloroplastic                      | 258 | 34.9 / 22.5  | 8.4 / 5.5 | 0.13 | <b>1.05 ± 0.05</b> | <b>1.08 ± 0.04</b> | 0.96 ± 0.05        | 0.88 ± 0.02        | <b>1.24 ± 0.11</b> | <b>1.19 ± 0.66</b> | 0.12 | <b>1.01 ± 0.03</b> | <b>0.98 ± 0.07</b> | <b>1.22 ± 0.01</b> | <b>1.21 ± 0.07</b> | 1.11 ± 0.10        | 1.48 ± 0.04        |
| S42 | At2g43750 | Cysteine synthase, chloroplastic/chromoplastic                        | 70  | 41.7 / 32.0  | 8.1 / 5.9 | 0.22 | <b>0.87 ± 0.03</b> | <b>1.22 ± 0.02</b> | <b>1.10 ± 0.08</b> | <b>0.94 ± 0.02</b> | <b>2.07 ± 0.02</b> | <b>1.51 ± 0.05</b> | 0.08 | 1.25 ± 0.02        | 1.09 ± 0.04        | 1.50 ± 0.12        | 1.2 ± 0.05         | 1.67 ± 0.06        | 1.90 ± 0.06        |
| S43 | At3g16640 | Translationally-controlled tumor protein homolog                      | 363 | 18.9 / 18.5  | 4.5 / 4.8 | 0.50 | <b>1.08 ± 0.12</b> | <b>1.32 ± 0.15</b> | <b>0.85 ± 0.06</b> | <b>1.11 ± 0.03</b> | <b>0.68 ± 0.02</b> | <b>1.68 ± 0.03</b> | 0.36 | <b>0.91 ± 0.05</b> | <b>0.93 ± 0.12</b> | 1.50 ± 0.05        | <b>0.87 ± 0.01</b> | <b>0.89 ± 0.02</b> | <b>0.59 ± 0.02</b> |
| S44 | At3g55800 | Sedoheptulose-1,7-bisphosphatase, chloroplastic                       | 275 | 42.4 / 38.0  | 6.2 / 5.2 | 0.03 | <b>0.87 ± 0.04</b> | <b>1.03 ± 0.04</b> | 1.25 ± 0.02        | 1.04 ± 0.07        | <b>0.77 ± 0.14</b> | <b>1.32 ± 0.07</b> | 0.04 | <b>0.37 ± 0.05</b> | <b>0.35 ± 0.02</b> | 1.14 ± 0.08        | <b>0.95 ± 0.04</b> | 1.13 ± 0.00        | <b>0.92 ± 0.05</b> |
| S45 | At2g21330 | Fructose-bisphosphate aldolase                                        | 323 | 33.3 / 34.0  | 5.3 / 5.4 | 1.16 | <b>0.89 ± 0.14</b> | <b>1.09 ± 0.21</b> | 0.72 ± 0.03        | 1.03 ± 0.09        | <b>1.22 ± 0.02</b> | <b>1.50 ± 0.06</b> | 1.12 | <b>0.66 ± 0.11</b> | <b>0.67 ± 0.02</b> | 1.39 ± 0.02        | <b>0.91 ± 0.08</b> | 1.15 ± 0.08        | 1.17 ± 0.09        |
| S46 | At2g41530 | S-formylglutathione hydrolase                                         | 402 | 31.7 / 26.0  | 5.9 / 6.2 | 0.17 | <b>1.34 ± 0.07</b> | <b>2.45 ± 0.02</b> | 1.15 ± 0.02        | 0.95 ± 0.06        | <b>1.25 ± 0.07</b> | <b>1.58 ± 0.01</b> | 0.11 | <b>1.01 ± 0.09</b> | <b>0.96 ± 0.03</b> | 1.47 ± 0.01        | <b>0.78 ± 0.02</b> | 1.55 ± 0.01        | 1.53 ± 0.05        |
| S47 | At2g40490 | Uroporphyrinogen decarboxylase 2, chloroplastic                       | 129 | 43.6 / 38.0  | 8.3 / 6.6 | 0.22 | <b>1.07 ± 0.02</b> | <b>0.83 ± 0.01</b> | 1.05 ± 0.06        | 1.07 ± 0.04        | <b>0.77 ± 0.06</b> | <b>0.66 ± 0.04</b> | 0.20 | 1.18 ± 0.01        | 1.22 ± 0.02        | 0.97 ± 0.13        | 1.26 ± 0.12        | <b>0.82 ± 0.05</b> | 1.18 ± 0.09        |
| S48 | At5g14740 | Carbonic anhydrase 2, chloroplastic                                   | 397 | 28.3 / 29.0  | 5.4 / 5.5 | 0.53 | <b>1.42 ± 0.09</b> | <b>1.36 ± 0.06</b> | <b>0.83 ± 0.07</b> | <b>0.99 ± 0.04</b> | <b>1.16 ± 0.10</b> | <b>1.16 ± 0.02</b> | 0.36 | <b>0.88 ± 0.07</b> | <b>0.81 ± 0.18</b> | <b>0.90 ± 0.00</b> | 1.15 ± 0.06        | 1.04 ± 0.02        | 1.29 ± 0.07        |
| S49 | At5g36700 | 4-nitrophenylphosphatase-like                                         | 180 | 43.1 / 60.0  | 8.8 / 5.9 | 0.54 | <b>1.77 ± 0.35</b> | <b>1.50 ± 0.07</b> | 1.15 ± 0.09        | 1.33 ± 0.13        | <b>1.71 ± 0.03</b> | <b>1.41 ± 0.02</b> | 0.38 | <b>1.07 ± 0.14</b> | <b>0.99 ± 0.11</b> | 1.21 ± 0.07        | 1.21 ± 0.03        | 1.11 ± 0.02        | <b>0.80 ± 0.03</b> |
| S50 | At5g20630 | Germin-like protein subfamily 3 member 3                              | 110 | 21.8 / 18.5  | 6.3 / 6.2 | 0.03 | <b>0.65 ± 0.04</b> | <b>1.18 ± 0.02</b> | 1.28 ± 0.11        | 1.11 ± 0.06        | <b>1.05 ± 0.09</b> | <b>1.53 ± 0.01</b> | 0.07 | <b>1.05 ± 0.02</b> | <b>0.74 ± 0.02</b> | 1.09 ± 0.04        | <b>0.95 ± 0.05</b> | 1.27 ± 0.09        | <b>0.95 ± 0.03</b> |
| S51 | At4g39260 | Glycine-rich RNA-binding protein 8                                    | 217 | 16.6 / 16.5  | 5.6 / 5.4 | 0.20 | <b>0.93 ± 0.03</b> | <b>1.78 ± 0.08</b> | 1.08 ± 0.05        | 1.06 ± 0.10        | <b>1.41 ± 0.08</b> | <b>1.10 ± 0.15</b> | 0.27 | <b>0.86 ± 0.05</b> | <b>0.76 ± 0.12</b> | 1.29 ± 0.01        | <b>0.97 ± 0.01</b> | 1.09 ± 0.05        | 1.36 ± 0.02        |
| S52 | At3g62030 | Peptidyl-prolyl cis-trans isomerase CYP20-3, chloroplastic            | 282 | 28.2 / 17.5  | 8.8 / 5.6 | 0.08 | <b>0.85 ± 0.13</b> | <b>0.62 ± 0.01</b> | 1.14 ± 0.03        | 0.65 ± 0.11        | <b>1.32 ± 0.13</b> | <b>1.24 ± 0.01</b> | 0.06 | <b>0.89 ± 0.10</b> | <b>0.89 ± 0.20</b> | 1.05 ± 0.01        | <b>0.77 ± 0.01</b> | 1.03 ± 0.07        | <b>0.99 ± 0.03</b> |
| S53 | At3g08740 | Putative elongation factor P (EF-P)                                   | 198 | 26.2 / 19.0  | 8.6 / 5.4 | 0.04 | <b>1.95 ± 0.01</b> | <b>2.43 ± 0.02</b> | 0.74 ± 0.02        | 1.09 ± 0.02        | <b>1.01 ± 0.04</b> | <b>1.12 ± 0.05</b> | 0.04 | <b>1.31 ± 0.03</b> | <b>1.23 ± 0.03</b> | <b>0.76 ± 0.02</b> | <b>0.34 ± 0.01</b> | 2.37 ± 0.12        | 2.17 ± 0.01        |
| S54 | At4g09010 | Thylakoid luminal 29 kDa protein, chloroplastic                       | 252 | 37.9 / 22.5  | 8.6 / 6.2 | 0.07 | <b>0.69 ± 0.06</b> | <b>0.59 ± 0.06</b> | 1.21 ± 0.02        | 1.06 ± 0.02        | <b>1.09 ± 0.02</b> | <b>1.73 ± 0.14</b> | 0.06 | <b>0.69 ± 0.06</b> | <b>0.94 ± 0.05</b> | 1.19 ± 0.04        | <b>1.03 ± 0.08</b> | 2.01 ± 0.07        | 2.14 ± 0.03        |

|     |           |                                                                |     |               |           |      |             |             |             |             |             |             |      |             |             |             |             |             |             |
|-----|-----------|----------------------------------------------------------------|-----|---------------|-----------|------|-------------|-------------|-------------|-------------|-------------|-------------|------|-------------|-------------|-------------|-------------|-------------|-------------|
| S55 | At5g09650 | Soluble inorganic pyrophosphatase 1, chloroplastic             | 236 | 33.4 / 26.0   | 5.7 / 5.2 | 0.10 | 0.95 ± 0.09 | 0.80 ± 0.08 | 1.11 ± 0.03 | 0.97 ± 0.07 | 0.84 ± 0.03 | 1.38 ± 0.04 | 0.08 | 1.12 ± 0.07 | 1.31 ± 0.10 | 1.06 ± 0.01 | 0.92 ± 0.01 | 1.02 ± 0.06 | 0.87 ± 0.06 |
| S56 | At1g65930 | Isocitrate dehydrogenase [NADP]                                | 238 | 45.7 / 46.5   | 6.1 / 6.4 | 0.33 | 1.36 ± 0.07 | 1.09 ± 0.10 | 1.01 ± 0.04 | 0.97 ± 0.03 | 0.93 ± 0.06 | 1.40 ± 0.15 | 0.45 | 0.90 ± 0.04 | 0.80 ± 0.02 | 0.99 ± 0.02 | 1.11 ± 0.05 | 1.21 ± 0.13 | 1.21 ± 0.02 |
| S57 | At3g55800 | Sedoheptulose-1,7-bisphosphatase, chloroplastic                | 497 | 42.4 / 36.5   | 6.2 / 5.3 | 0.16 | 1.11 ± 0.24 | 0.87 ± 0.14 | 0.75 ± 0.07 | 0.65 ± 0.12 | 0.92 ± 0.06 | 1.42 ± 0.11 | 0.21 | 0.95 ± 0.07 | 0.85 ± 0.19 | 1.37 ± 0.09 | 1.22 ± 0.08 | 0.99 ± 0.15 | 0.87 ± 0.10 |
| S58 | At5g25980 | Myrosinase 2                                                   | 64  | 62.7 / 58.0   | 7.1 / 6.6 | 0.13 | 1.09 ± 0.02 | 1.22 ± 0.03 | 1.07 ± 0.05 | 1.09 ± 0.04 | 0.50 ± 0.02 | 1.04 ± 0.03 | 0.07 | 1.04 ± 0.02 | 1.15 ± 0.02 | 1.22 ± 0.04 | 1.02 ± 0.03 | 1.05 ± 0.03 | 0.84 ± 0.04 |
| S59 | At3g01500 | Carbonic anhydrase, chloroplastic                              | 276 | 37.5 / 22.0   | 5.7 / 6.6 | 0.06 | 0.89 ± 0.02 | 1.43 ± 0.05 | 0.93 ± 0.02 | 0.92 ± 0.13 | 0.89 ± 0.07 | 1.43 ± 0.07 | 0.05 | 0.86 ± 0.06 | 0.76 ± 0.04 | 0.88 ± 0.14 | 1.20 ± 0.10 | 0.84 ± 0.04 | 0.76 ± 0.04 |
| S60 | At3g50820 | Oxygen-evolving enhancer protein 1-2, chloroplastic            | 155 | 35.0 / 26.0   | 5.9 / 5.3 | 0.46 | 0.78 ± 0.02 | 0.96 ± 0.06 | 1.11 ± 0.04 | 1.01 ± 0.03 | 1.41 ± 0.03 | 1.55 ± 0.11 | 0.50 | 1.00 ± 0.04 | 0.99 ± 0.13 | 1.06 ± 0.03 | 0.99 ± 0.01 | 0.97 ± 0.01 | 0.79 ± 0.09 |
| S61 | At3g12780 | Phosphoglycerate kinase 1, chloroplastic                       | 432 | 50.0 / 45.0   | 5.9 / 5.3 | 0.02 | 0.66 ± 0.01 | 0.43 ± 0.02 | 0.96 ± 0.04 | 0.66 ± 0.05 | 0.86 ± 0.04 | 0.66 ± 0.04 | 0.01 | 1.02 ± 0.11 | 1.13 ± 0.15 | 0.88 ± 0.02 | 1.00 ± 0.00 | 1.04 ± 0.06 | 0.70 ± 0.06 |
| S62 | At4g38970 | Probable fructose-bisphosphate aldolase 2, chloroplastic       | 194 | 42.9 / 32.0   | 6.8 / 5.6 | 0.57 | 1.46 ± 0.05 | 1.47 ± 0.04 | 1.01 ± 0.10 | 1.12 ± 0.01 | 1.41 ± 0.12 | 1.17 ± 0.02 | 0.41 | 0.52 ± 0.03 | 0.42 ± 0.06 | 1.07 ± 0.01 | 1.06 ± 0.11 | 1.96 ± 0.08 | 2.44 ± 0.12 |
| S63 | At1g57720 | Probable elongation factor 1-gamma 2                           | 316 | 46.4 / 48.5   | 5.6 / 5.7 | 0.01 | 0.76 ± 0.04 | 0.88 ± 0.04 | 1.19 ± 0.04 | 0.97 ± 0.03 | 0.95 ± 0.01 | 1.14 ± 0.07 | 0.01 | 1.40 ± 0.03 | 1.42 ± 0.06 | 0.50 ± 0.02 | 0.59 ± 0.01 | 2.06 ± 0.15 | 2.51 ± 0.02 |
| S64 | At4g38970 | Probable fructose-bisphosphate aldolase 2, chloroplastic       | 519 | 42.9 / 34.0   | 6.8 / 5.6 | 0.23 | 1.05 ± 0.31 | 1.02 ± 0.16 | 1.21 ± 0.02 | 1.26 ± 0.05 | 1.22 ± 0.06 | 1.46 ± 0.09 | 0.26 | 1.05 ± 0.16 | 1.19 ± 0.28 | 0.97 ± 0.09 | 1.15 ± 0.01 | 1.22 ± 0.02 | 1.28 ± 0.04 |
| S65 | At3g55800 | Sedoheptulose-1,7-bisphosphatase, chloroplastic                | 390 | 42.4 / 77.0   | 6.2 / 6.7 | 0.92 | 1.01 ± 0.03 | 0.88 ± 0.04 | 0.72 ± 0.08 | 0.96 ± 0.04 | 0.64 ± 0.04 | 0.65 ± 0.03 | 0.92 | 1.15 ± 0.01 | 0.87 ± 0.02 | 0.87 ± 0.05 | 1.21 ± 0.05 | 0.90 ± 0.06 | 0.67 ± 0.04 |
| S66 | N/A       | <b>Not identified</b>                                          | N/A | N/A / 70.0    | N/A / 6.7 | 0.05 | 1.62 ± 0.01 | 1.04 ± 0.01 | 0.53 ± 0.01 | 0.69 ± 0.01 | 0.88 ± 0.01 | 0.52 ± 0.00 | 0.05 | 0.54 ± 0.01 | 0.48 ± 0.02 | 0.61 ± 0.01 | 1.26 ± 0.02 | 1.15 ± 0.04 | 1.35 ± 0.14 |
| S67 | At5g65730 | Probable xyloglucan endotransglucosylase/hydrolase protein 6   | 32  | 33.7 / 26.0   | 6.7 / 6.8 | 0.48 | 1.12 ± 0.01 | 1.17 ± 0.00 | 1.06 ± 0.03 | 1.08 ± 0.02 | 1.36 ± 0.09 | 1.71 ± 0.02 | 0.29 | 2.23 ± 0.01 | 2.38 ± 0.01 | 1.14 ± 0.01 | 1.14 ± 0.09 | 1.58 ± 0.04 | 1.50 ± 0.02 |
| S68 | At3g54050 | Fructose-1,6-bisphosphatase, chloroplastic                     | 308 | 45.2 / 47.0   | 5.3 / 5.1 | 0.23 | 0.97 ± 0.13 | 1.16 ± 0.10 | 1.15 ± 0.07 | 0.85 ± 0.05 | 0.44 ± 0.66 | 1.13 ± 0.06 | 0.11 | 0.84 ± 0.07 | 0.83 ± 0.09 | 1.05 ± 0.02 | 1.02 ± 0.01 | 1.08 ± 0.04 | 0.92 ± 0.03 |
| S69 | At1g53240 | Malate dehydrogenase 1, mitochondrial                          | 273 | 35.8 / 32.0   | 8.5 / 6.4 | 0.04 | 0.90 ± 0.08 | 0.91 ± 0.05 | 1.21 ± 0.03 | 1.05 ± 0.04 | 1.10 ± 0.08 | 1.38 ± 0.03 | 0.04 | 1.44 ± 0.05 | 1.72 ± 0.07 | 1.28 ± 0.01 | 1.12 ± 0.03 | 1.01 ± 0.07 | 0.98 ± 0.06 |
| S70 | At4g29060 | Elongation factor Ts                                           | 113 | 103.8 / 95.0  | 5.0 / 5.0 | 0.08 | 1.76 ± 0.01 | 1.85 ± 0.01 | 0.93 ± 0.02 | 1.05 ± 0.05 | 1.20 ± 0.03 | 1.23 ± 0.01 | 0.08 | 1.49 ± 0.01 | 1.53 ± 0.01 | 0.88 ± 0.09 | 1.12 ± 0.01 | 1.66 ± 0.04 | 1.03 ± 0.14 |
| S71 | At1g18080 | Guanine nucleotide-binding protein subunit beta-like protein A | 350 | 35.7 / 34.0   | 7.6 / 8.5 | 0.10 | 0.63 ± 0.03 | 0.71 ± 0.04 | 0.72 ± 0.13 | 1.06 ± 0.04 | 0.63 ± 0.06 | 0.71 ± 0.02 | 0.05 | 0.75 ± 0.02 | 1.54 ± 0.03 | 0.45 ± 0.03 | 0.41 ± 0.01 | 0.87 ± 0.15 | 1.41 ± 0.13 |
| S72 | N/A       | <b>Not identified</b>                                          | N/A | N/A / 18.5    | N/A / 5.9 | 0.02 | 1.01 ± 0.01 | 1.05 ± 0.05 | 1.30 ± 0.07 | 0.94 ± 0.12 | 1.40 ± 0.05 | 1.47 ± 0.09 | 0.02 | 2.05 ± 0.02 | 1.59 ± 0.06 | 1.12 ± 0.01 | 1.33 ± 0.08 | 1.15 ± 0.01 | 0.97 ± 0.02 |
| S73 | At4g29060 | Elongation factor Ts                                           | 113 | 103.8 / 145.0 | 5.0 / 5.2 | 0.31 | 0.67 ± 0.05 | 1.18 ± 0.08 | 0.40 ± 0.01 | 0.94 ± 0.02 | 0.49 ± 0.00 | 1.12 ± 0.02 | 0.32 | 1.34 ± 0.04 | 1.50 ± 0.07 | 0.72 ± 0.02 | 0.46 ± 0.01 | 1.46 ± 0.08 | 1.06 ± 0.00 |
| S74 | At4g23670 | Major latex protein-related / MLP-related                      | 101 | 17.5 / 16.0   | 5.9 / 6.2 | 0.07 | 0.86 ± 0.05 | 1.34 ± 0.11 | 2.10 ± 0.04 | 1.98 ± 0.02 | 1.30 ± 0.09 | 1.34 ± 0.17 | 0.09 | 1.26 ± 0.06 | 1.37 ± 0.11 | 0.86 ± 0.04 | 0.87 ± 0.03 | 1.36 ± 0.02 | 1.12 ± 0.05 |
| S75 | At4g39260 | Glycine-rich RNA-binding protein 8                             | 107 | 16.6 / 17.5   | 5.6 / 5.4 | 0.23 | 1.03 ± 0.02 | 1.2 ± 0.03  | 1.17 ± 0.03 | 1.62 ± 0.01 | 1.14 ± 0.03 | 1.01 ± 0.08 | 0.38 | 1.07 ± 0.04 | 0.99 ± 0.01 | 0.62 ± 0.04 | 0.46 ± 0.02 | 0.94 ± 0.03 | 1.06 ± 0.07 |
| S76 | At3g57260 | Glucan endo-1,3-beta-glucosidase, acidic isoform               | 124 | 37.3 / 30.0   | 4.9 / 5.0 | 0.02 | 1.10 ± 0.03 | 1.06 ± 0.01 | 0.65 ± 0.04 | 0.93 ± 0.01 | 1.09 ± 0.04 | 1.06 ± 0.09 | 0.03 | 0.98 ± 0.03 | 1.01 ± 0.01 | 0.77 ± 0.03 | 0.65 ± 0.01 | 0.89 ± 0.12 | 1.03 ± 0.04 |
| S77 | At1g09750 | Nucleoid DNA-binding-like protein                              | 99  | 47.7 / 48.5   | 7.5 / 7.7 | 0.29 | 1.07 ± 0.35 | 1.07 ± 0.00 | 0.97 ± 0.03 | 0.85 ± 0.03 | 1.11 ± 0.21 | 0.96 ± 0.02 | 0.36 | 0.91 ± 0.14 | 1.22 ± 0.08 | 0.58 ± 0.03 | 0.17 ± 0.01 | 1.01 ± 0.02 | 1.22 ± 0.07 |
| S78 | At1g56340 | Calreticulin-1                                                 | 152 | 48.5 / 58.0   | 4.5 / 4.8 | 0.08 | 0.93 ± 0.06 | 0.88 ± 0.02 | 0.79 ± 0.04 | 1.39 ± 0.04 | 1.3 ± 0.10  | 1.05 ± 0.09 | 0.10 | 1.05 ± 0.15 | 1.01 ± 0.07 | 0.81 ± 0.04 | 0.57 ± 0.03 | 0.89 ± 0.01 | 1.04 ± 0.04 |
| S79 | At1g78380 | Glutathione S-transferase TAU 19                               | 122 | 25.7 / 21.5   | 5.9 / 5.7 | 0.58 | 1.12 ± 0.01 | 1.25 ± 0.02 | 0.85 ± 0.02 | 1.01 ± 0.02 | 1.21 ± 0.05 | 0.98 ± 0.06 | 0.47 | 0.9 ± 0.06  | 1.04 ± 0.03 | 1.01 ± 0.02 | 0.54 ± 0.01 | 1.28 ± 0.06 | 1.17 ± 0.09 |
| S80 | At1g20620 | Catalase-3                                                     | 184 | 56.7 / 55.0   | 7.3 / 8.0 | 0.14 | 0.93 ± 0.03 | 1.01 ± 0.03 | 0.48 ± 0.02 | 1.02 ± 0.14 | 1.22 ± 0.06 | 0.93 ± 0.04 | 0.20 | 1.05 ± 0.01 | 0.99 ± 0.04 | 0.67 ± 0.04 | 0.83 ± 0.05 | 1.13 ± 0.18 | 1.11 ± 0.09 |
| S81 | At4g09320 | Nucleoside diphosphate kinase 1                                | 316 | 16.5 / 14.5   | 6.3 / 6.5 | 0.27 | 0.89 ± 0.07 | 1.03 ± 0.04 | 1.60 ± 0.15 | 1.85 ± 0.19 | 1.06 ± 0.06 | 0.92 ± 0.05 | 0.34 | 1.21 ± 0.04 | 0.97 ± 0.09 | 2.06 ± 0.21 | 1.07 ± 0.03 | 1.15 ± 0.03 | 1.21 ± 0.04 |
| S82 | At4g14880 | Cysteine synthase                                              | 129 | 33.8 / 32.0   | 5.9 / 6.2 | 0.15 | 1.28 ± 0.03 | 0.93 ± 0.08 | 0.35 ± 0.00 | 1.10 ± 0.01 | 1.06 ± 0.13 | 1.11 ± 0.07 | 0.19 | 0.89 ± 0.04 | 1.05 ± 0.07 | 1.32 ± 0.00 | 0.78 ± 0.00 | 1.15 ± 0.07 | 0.95 ± 0.04 |
| S83 | N/A       | <b>Not identified</b>                                          | N/A | N/A / 30.0    | N/A / 6.9 | 0.28 | 0.97 ± 0.02 | 1.05 ± 0.04 | 4.17 ± 0.05 | 2.51 ± 0.04 | 1.07 ± 0.06 | 0.88 ± 0.04 | 0.35 | 1.11 ± 0.06 | 1.06 ± 0.05 | 0.98 ± 0.02 | 0.88 ± 0.01 | 1.16 ± 0.05 | 1.01 ± 0.06 |
| S84 | At1g30580 | GTP-binding protein                                            | 280 | 44.5 / 46.0   | 6.4 / 7.2 | 0.04 | 0.94 ± 0.07 | 0.97 ± 0.10 | 0.61 ± 0.03 | 0.67 ± 0.03 | 1.12 ± 0.02 | 0.93 ± 0.07 | 0.06 | 1.16 ± 0.04 | 0.92 ± 0.02 | 1.88 ± 0.08 | 1.76 ± 0.05 | 0.91 ± 0.04 | 0.88 ± 0.06 |

|      |           |                                                           |     |              |           |      |             |             |              |             |             |             |      |             |             |             |             |             |             |
|------|-----------|-----------------------------------------------------------|-----|--------------|-----------|------|-------------|-------------|--------------|-------------|-------------|-------------|------|-------------|-------------|-------------|-------------|-------------|-------------|
| S85  | At4g02520 | Atpm24.1 glutathione S transferase                        | 451 | 24.1 / 21.5  | 6.1 / 6.3 | 0.21 | 1.14 ± 0.02 | 0.98 ± 0.04 | 1.47 ± 0.03  | 1.51 ± 0.04 | 1.21 ± 0.07 | 1.05 ± 0.03 | 0.35 | 0.94 ± 0.08 | 1.24 ± 0.06 | 1.03 ± 0.01 | 1.09 ± 0.04 | 1.19 ± 0.04 | 0.91 ± 0.04 |
| S86  | At2g37220 | Ribonucleoprotein At2g37220, chloroplastic                | 63  | 30.7 / 22.5  | 5.6 / 4.9 | 0.36 | 0.90 ± 0.03 | 1.22 ± 0.01 | 0.48 ± 0.04  | 0.50 ± 0.10 | 1.07 ± 0.08 | 1.12 ± 0.11 | 0.36 | 1.13 ± 0.02 | 1.01 ± 0.05 | 0.96 ± 0.04 | 0.73 ± 0.06 | 1.02 ± 0.03 | 0.91 ± 0.01 |
| S87  | At3g12580 | Heat shock cognate 70 kDa protein 4                       | 296 | 71.1 / 73.0  | 5.2 / 5.3 | 0.07 | 1.14 ± 0.02 | 1.06 ± 0.01 | 0.30 ± 0.02  | 1.20 ± 0.15 | 1.21 ± 0.04 | 1.25 ± 0.05 | 0.11 | 1.05 ± 0.07 | 1.21 ± 0.11 | 1.05 ± 0.07 | 1.41 ± 0.08 | 1.19 ± 0.06 | 1.04 ± 0.13 |
| S88  | At1g06680 | Oxygen-evolving enhancer protein 2-1, chloroplastic       | 119 | 28.1 / 20.0  | 6.9 / 5.4 | 0.27 | 1.01 ± 0.06 | 1.1 ± 0.03  | 0.70 ± 0.12  | 1.12 ± 0.15 | 1.23 ± 0.04 | 0.97 ± 0.04 | 0.26 | 0.92 ± 0.05 | 1.02 ± 0.02 | 0.94 ± 0.26 | 0.77 ± 0.12 | 1.07 ± 0.03 | 0.92 ± 0.05 |
| S89  | At1g19130 | Putative uncharacterized protein At1g19130/F14D16_18      | 70  | 21.6 / 19.5  | 5.5 / 5.5 | 0.45 | 1.16 ± 0.07 | 1.3 ± 0.06  | 2.04 ± 0.01  | 1.30 ± 0.00 | 1.11 ± 0.09 | 1.01 ± 0.02 | 0.44 | 1.05 ± 0.01 | 0.89 ± 0.15 | 1.38 ± 0.01 | 0.48 ± 0.00 | 1.06 ± 0.02 | 0.92 ± 0.06 |
| S90  | N/A       | <b>Not identified</b>                                     | N/A | N/A / 65.0   | N/A / 7.9 | 0.15 | 0.99 ± 0.09 | 0.97 ± 0.12 | 0.67 ± 0.01  | 0.97 ± 0.02 | 0.98 ± 0.01 | 1.05 ± 0.01 | 0.18 | 0.93 ± 0.07 | 1.14 ± 0.08 | 1.03 ± 0.02 | 1.05 ± 0.01 | 0.92 ± 0.02 | 1.12 ± 0.05 |
| S91  | At5g25980 | Myrosinase 2                                              | 144 | 62.7 / 60.0  | 7.1 / 6.8 | 0.17 | 0.41 ± 0.02 | 0.39 ± 0.05 | 0.97 ± 0.11  | 1.03 ± 0.01 | 0.64 ± 0.02 | 0.97 ± 0.14 | 0.17 | 0.28 ± 0.04 | 0.37 ± 0.02 | 0.92 ± 0.01 | 0.97 ± 0.03 | 1.04 ± 0.14 | 0.99 ± 0.00 |
| S92  | At3g58610 | Ketol-acid reductoisomerase, chloroplastic                | 173 | 63.8 / 58.0  | 6.4 / 5.9 | 3.75 | 0.93 ± 0.02 | 1.01 ± 0.02 | 0.49 ± 0.02  | 0.87 ± 0.02 | 0.93 ± 0.07 | 1.03 ± 0.10 | 3.10 | 1.28 ± 0.02 | 1.06 ± 0.07 | 1.24 ± 0.04 | 0.99 ± 0.02 | 1.05 ± 0.04 | 0.97 ± 0.02 |
| S93  | At3g63140 | Uncharacterized protein At3g63140, chloroplastic          | 361 | 43.9 / 36.5  | 8.5 / 6.5 | 0.03 | 1.07 ± 0.04 | 1.28 ± 0.09 | 1.93 ± 0.06  | 2.50 ± 0.11 | 0.94 ± 0.08 | 1.06 ± 0.10 | 0.03 | 0.91 ± 0.04 | 0.89 ± 0.06 | 0.86 ± 0.05 | 0.81 ± 0.06 | 1.16 ± 0.03 | 1.03 ± 0.09 |
| S94  | N/A       | <b>Not identified</b>                                     | N/A | N/A / 65.0   | N/A / 8.0 | 0.30 | 0.88 ± 0.02 | 1.05 ± 0.02 | 0.52 ± 0.01  | 0.98 ± 0.01 | 1.21 ± 0.02 | 0.9 ± 0.06  | 0.46 | 1.01 ± 0.01 | 1.04 ± 0.14 | 1.10 ± 0.01 | 0.93 ± 0.01 | 1.19 ± 0.03 | 1.13 ± 0.09 |
| S95  | At1g04410 | Malate dehydrogenase, cytoplasmic 1                       | 81  | 35.6 / 36.5  | 6.1 / 6.3 | 0.08 | 1.23 ± 0.12 | 1.21 ± 0.05 | 1.26 ± 0.04  | 0.58 ± 0.01 | 0.97 ± 0.06 | 1.28 ± 0.09 | 0.12 | 1.07 ± 0.08 | 1.28 ± 0.04 | 1.26 ± 0.03 | 0.92 ± 0.02 | 1.14 ± 0.06 | 0.89 ± 0.01 |
| S96  | At5g25980 | Myrosinase 2                                              | 577 | 62.7 / 60.0  | 7.1 / 7.0 | 0.04 | 1.13 ± 0.14 | 1.12 ± 0.07 | 0.35 ± 0.06  | 0.65 ± 0.06 | 0.89 ± 0.00 | 1.21 ± 0.05 | 0.04 | 1.01 ± 0.11 | 0.91 ± 0.04 | 0.64 ± 0.09 | 0.48 ± 0.05 | 1.1 ± 0.01  | 0.97 ± 0.05 |
| S97  | At1g56075 | Elongation factor EF-2                                    | 392 | 93.9 / 90.0  | 5.9 / 6.5 | 0.05 | 0.91 ± 0.06 | 1.19 ± 0.13 | 0.55 ± 0.01  | 0.61 ± 0.01 | 0.92 ± 0.06 | 1.3 ± 0.06  | 0.04 | 0.97 ± 0.09 | 1.11 ± 0.10 | 2.24 ± 0.02 | 1.01 ± 0.01 | 1.14 ± 0.04 | 0.89 ± 0.03 |
| S98  | At4g23670 | Major latex protein-related / MLP-related                 | 132 | 17.5 / 16.0  | 5.9 / 6.3 | 0.05 | 1.06 ± 0.03 | 0.93 ± 0.03 | 0.71 ± 0.09  | 1.66 ± 0.36 | 0.96 ± 0.01 | 0.95 ± 0.03 | 0.03 | 1.15 ± 0.02 | 0.88 ± 0.09 | 0.87 ± 0.04 | 0.41 ± 0.02 | 1.22 ± 0.02 | 1.06 ± 0.02 |
| S99  | N/A       | <b>Not identified</b>                                     | N/A | N/A / 26.0   | N/A / 7.2 | 0.32 | 0.95 ± 0.05 | 1.15 ± 0.04 | 0.90 ± 0.02  | 1.39 ± 0.02 | 1.01 ± 0.05 | 1.07 ± 0.05 | 0.35 | 1.06 ± 0.03 | 1.19 ± 0.01 | 0.98 ± 0.05 | 0.89 ± 0.01 | 0.92 ± 0.06 | 0.91 ± 0.02 |
| S100 | N/A       | <b>Not identified</b>                                     | N/A | N/A / 155.0  | N/A / 4.9 | 0.10 | 0.89 ± 0.01 | 1.14 ± 0.08 | 0.53 ± 0.01  | 1.35 ± 0.03 | 0.93 ± 0.03 | 0.92 ± 0.04 | 0.15 | 1.25 ± 0.11 | 1.05 ± 0.10 | 0.83 ± 0.03 | 0.73 ± 0.01 | 0.88 ± 0.06 | 1.14 ± 0.06 |
| S101 | AtCg00490 | Ribulose bisphosphate carboxylase large chain             | 86  | 53.0 / 36.5  | 5.9 / 6.7 | 0.04 | 0.95 ± 0.02 | 1.22 ± 0.04 | 1.49 ± 0.06  | 0.94 ± 0.03 | 1.05 ± 0.15 | 1.1 ± 0.05  | 0.04 | 1.18 ± 0.14 | 1.01 ± 0.06 | 1.49 ± 0.04 | 0.83 ± 0.02 | 1.04 ± 0.02 | 0.98 ± 0.06 |
| S102 | At3g02360 | 6-phosphogluconate dehydrogenase, decarboxylating         | 288 | 53.6 / 48.5  | 7.2 / 7.3 | 0.10 | 1.09 ± 0.06 | 1.06 ± 0.03 | 0.71 ± 0.00  | 1.35 ± 0.02 | 1.01 ± 0.03 | 1.01 ± 0.02 | 0.21 | 1.11 ± 0.13 | 1.03 ± 0.02 | 1.08 ± 0.02 | 1.13 ± 0.02 | 0.95 ± 0.03 | 0.99 ± 0.02 |
| S103 | At1g70730 | Probable phosphoglucomutase, cytoplasmic 2                | 106 | 63.5 / 70.0  | 5.6 / 5.7 | 0.05 | 1.04 ± 0.04 | 1.28 ± 0.01 | 0.51 ± 0.01  | 1.79 ± 0.02 | 1.11 ± 0.05 | 1.01 ± 0.10 | 0.03 | 1.12 ± 0.09 | 1.07 ± 0.03 | 0.55 ± 0.01 | 0.88 ± 0.01 | 1.06 ± 0.06 | 0.95 ± 0.01 |
| S104 | At1g56410 | Heat shock cognate 70 kDa protein/HSC70/HSP70             | 68  | 68.4 / 70.0  | 5.2 / 5.3 | 1.88 | 1.06 ± 0.02 | 1.11 ± 0.04 | 0.46 ± 0.08  | 1.01 ± 0.17 | 1.25 ± 0.11 | 1.07 ± 0.02 | 2.15 | 1.15 ± 0.03 | 0.95 ± 0.09 | 0.95 ± 0.18 | 1.45 ± 0.08 | 1.04 ± 0.01 | 1.22 ± 0.05 |
| S105 | At5g66190 | Ferredoxin--NADP reductase, leaf isozyme 1, chloroplastic | 117 | 40.3 / 30.0  | 8.3 / 5.7 | 0.30 | 1.03 ± 0.00 | 0.99 ± 0.05 | 0.66 ± 0.03  | 0.91 ± 0.03 | 0.93 ± 0.03 | 1.17 ± 0.09 | 0.23 | 1.21 ± 0.08 | 0.93 ± 0.02 | 1.44 ± 0.02 | 0.84 ± 0.01 | 1.05 ± 0.06 | 1.21 ± 0.02 |
| S106 | AtCg00490 | Ribulose bisphosphate carboxylase large chain             | 96  | 53.0 / 36.5  | 5.9 / 6.6 | 0.22 | 1.17 ± 0.02 | 1.07 ± 0.06 | 10.06 ± 0.09 | 2.76 ± 0.02 | 1.1 ± 0.08  | 0.97 ± 0.02 | 0.29 | 1.21 ± 0.10 | 0.91 ± 0.01 | 1.08 ± 0.02 | 0.62 ± 0.01 | 0.98 ± 0.02 | 0.92 ± 0.05 |
| S107 | At5g02240 | Uncharacterized protein At5g02240                         | 106 | 27.1 / 24.5  | 6.2 / 6.2 | 0.09 | 1.19 ± 0.02 | 1.01 ± 0.02 | 1.62 ± 0.07  | 1.48 ± 0.09 | 1.17 ± 0.14 | 1.05 ± 0.01 | 0.08 | 1.2 ± 0.05  | 0.92 ± 0.07 | 0.95 ± 0.04 | 0.57 ± 0.03 | 1.14 ± 0.00 | 0.95 ± 0.11 |
| S108 | At3g15356 | Lectin-like protein                                       | 243 | 29.7 / 26.0  | 8.9 / 9.4 | 0.11 | 1.24 ± 0.06 | 0.91 ± 0.06 | 0.83 ± 0.02  | 1.75 ± 0.03 | 1.01 ± 0.02 | 0.91 ± 0.14 | 0.11 | 1.3 ± 0.10  | 0.97 ± 0.05 | 0.46 ± 0.02 | 0.42 ± 0.01 | 0.99 ± 0.07 | 1.01 ± 0.03 |
| S109 | At1g21750 | Protein disulfide isomerase-like 1-1                      | 347 | 55.6 / 105.0 | 4.8 / 5.9 | 0.09 | 0.95 ± 0.01 | 1.09 ± 0.03 | 0.19 ± 0.00  | 1.15 ± 0.02 | 0.91 ± 0.06 | 0.98 ± 0.05 | 0.13 | 1.12 ± 0.05 | 1.21 ± 0.05 | 0.70 ± 0.02 | 0.40 ± 0.01 | 1.01 ± 0.06 | 1.24 ± 0.05 |
| S110 | At2g42600 | Phosphoenolpyruvate carboxylase 2                         | 112 | 109.8 / 60.0 | 5.6 / 5.1 | 0.20 | 0.96 ± 0.04 | 0.99 ± 0.06 | 0.65 ± 0.03  | 1.05 ± 0.07 | 0.98 ± 0.05 | 0.97 ± 0.03 | 0.15 | 1.22 ± 0.06 | 0.93 ± 0.09 | 0.92 ± 0.03 | 0.79 ± 0.06 | 1.24 ± 0.13 | 1.14 ± 0.07 |

**Table S5.** Complete list of identified proteins regulated by individual HS treatments in wild-type (Col-0) and activated *ipt* transformant roots. Molecular Weight (MW; theoretical, theo; experimental, exp.); Isoelectric point (pI; theoretical, theo; experimental, exp.); Relative spot volume (V%); Relative spot volume change.

| Spot N. | AGI (TAIR) | Name (UniProt)                                                        | Score | MW            |              | Wild type (Col-0)         |                    |                            |                    |                     |                    | Plants with increased CK levels (11.5) |                          |                    |                            |                    |                          |                    |                    |
|---------|------------|-----------------------------------------------------------------------|-------|---------------|--------------|---------------------------|--------------------|----------------------------|--------------------|---------------------|--------------------|----------------------------------------|--------------------------|--------------------|----------------------------|--------------------|--------------------------|--------------------|--------------------|
|         |            |                                                                       |       | (theo./exp.)  | (theo./exp.) | 40° C heat only to shoots |                    | 40° C heat to shoots&roots |                    | 40° C heat to roots |                    | 0                                      | 40° C heat only to shoot |                    | 40° C heat to shoots&roots |                    | 40° C heat only to roots |                    |                    |
|         |            |                                                                       |       |               |              | V%                        | 30 min             | 180 min                    | 30 min             | 180 min             | 30 min             |                                        | 180 min                  | V%                 | 30 min                     | 180 min            | 30 min                   | 180 min            | 30 min             |
| R01     | At5g26130  | Hypotetical protein, SCP family protein                               | 312   | 18.4 / 18.0   | 8.2 / 7.0    | 0.34                      | <b>0.94</b> ± 0.18 | <b>0.46</b> ± 0.06         | <b>0.98</b> ± 0.46 | <b>0.74</b> ± 0.22  | <b>0.64</b> ± 0.14 | <b>0.61</b> ± 0.24                     | 0.36                     | <b>0.68</b> ± 0.07 | <b>0.77</b> ± 0.03         | <b>0.90</b> ± 0.16 | <b>0.72</b> ± 0.03       | <b>0.86</b> ± 0.02 | <b>0.96</b> ± 0.04 |
| R02     | At5g17920  | 5-methyltetrahydropteroyltriglutamate--homocysteine methyltransferase | 787   | 84.4 / 80.0   | 6.1 / 6.8    | 0.15                      | <b>1.33</b> ± 0.16 | <b>1.74</b> ± 0.23         | <b>0.87</b> ± 0.05 | <b>1.08</b> ± 0.24  | <b>1.37</b> ± 0.17 | <b>2.03</b> ± 0.36                     | 0.15                     | <b>0.71</b> ± 0.27 | <b>0.64</b> ± 0.09         | <b>0.71</b> ± 0.01 | <b>0.58</b> ± 0.37       | <b>1.20</b> ± 0.00 | <b>0.82</b> ± 0.10 |
| R03     | At5g02500  | Heat shock cognate 70 kDa protein 1                                   | 1090  | 71.4 / 70.0   | 5.0 / 5.0    | 0.70                      | <b>0.94</b> ± 0.04 | <b>1.49</b> ± 0.07         | <b>0.94</b> ± 0.14 | <b>1.15</b> ± 0.11  | <b>1.06</b> ± 0.26 | <b>1.28</b> ± 0.09                     | 0.70                     | <b>1.09</b> ± 0.22 | <b>0.96</b> ± 0.10         | <b>0.88</b> ± 0.06 | <b>0.92</b> ± 0.07       | <b>1.04</b> ± 0.24 | <b>1.23</b> ± 0.19 |
| R04     | At4g37910  | Mitochondrial heat shock protein 70-1                                 | 581   | 73.0 / 70.0   | 5.5 / 5.2    | 0.08                      | <b>1.13</b> ± 0.06 | <b>2.84</b> ± 0.42         | <b>0.83</b> ± 0.14 | <b>1.12</b> ± 0.08  | <b>1.40</b> ± 0.20 | <b>1.23</b> ± 0.01                     | 0.08                     | <b>0.89</b> ± 0.27 | <b>0.99</b> ± 0.06         | <b>1.05</b> ± 0.28 | <b>0.78</b> ± 0.12       | <b>1.16</b> ± 0.15 | <b>1.22</b> ± 0.08 |
| R05     | At3g09260  | Beta-glucosidase 23                                                   | 781   | 59.7 / 60.0   | 6.5 / 7.0    | 0.50                      | <b>0.60</b> ± 0.30 | <b>0.48</b> ± 0.39         | <b>0.92</b> ± 0.09 | <b>0.73</b> ± 0.11  | <b>1.10</b> ± 0.29 | <b>0.84</b> ± 0.31                     | 0.50                     | <b>1.03</b> ± 0.15 | <b>1.22</b> ± 0.11         | <b>0.75</b> ± 0.24 | <b>0.52</b> ± 0.06       | <b>0.65</b> ± 0.29 | <b>0.58</b> ± 0.27 |
| R06     | At3g09260  | Beta-glucosidase 23                                                   | 638   | 59.7 / 60.0   | 6.5 / 7.1    | 0.35                      | <b>0.49</b> ± 0.06 | <b>0.49</b> ± 0.02         | <b>0.87</b> ± 0.09 | <b>0.74</b> ± 0.09  | <b>0.92</b> ± 0.40 | <b>0.66</b> ± 0.35                     | 0.24                     | <b>1.27</b> ± 0.04 | <b>1.10</b> ± 0.23         | <b>0.82</b> ± 0.09 | <b>0.69</b> ± 0.14       | <b>0.82</b> ± 0.08 | <b>0.85</b> ± 0.13 |
| R07     | At3g23990  | Chaperonin CPN60, mitochondrial                                       | 569   | 61.2 / 60.0   | 5.7 / 5.3    | 0.25                      | <b>0.94</b> ± 0.15 | <b>1.13</b> ± 0.29         | <b>0.83</b> ± 0.07 | <b>1.30</b> ± 0.16  | <b>1.72</b> ± 0.42 | <b>1.83</b> ± 0.22                     | 0.23                     | <b>0.56</b> ± 0.22 | <b>0.68</b> ± 0.15         | <b>0.70</b> ± 0.16 | <b>0.78</b> ± 0.04       | <b>1.66</b> ± 0.46 | <b>1.88</b> ± 0.40 |
| R08     | At1g24510  | T-complex protein 1 subunit epsilon                                   | 373   | 59.4 / 60.0   | 5.5 / 5.5    | 0.12                      | <b>1.03</b> ± 0.19 | <b>1.57</b> ± 0.34         | <b>0.76</b> ± 0.28 | <b>0.71</b> ± 0.08  | <b>1.39</b> ± 0.10 | <b>0.98</b> ± 0.20                     | 0.11                     | <b>0.82</b> ± 0.20 | <b>0.78</b> ± 0.14         | <b>0.63</b> ± 0.09 | <b>0.54</b> ± 0.15       | <b>1.13</b> ± 0.07 | <b>0.97</b> ± 0.22 |
| R09     | At4g13930  | Serine hydroxymethyltransferase 4                                     | 112   | 51.7 / 50.0   | 6.8 / 7.0    | 0.08                      | <b>0.83</b> ± 0.19 | <b>0.48</b> ± 0.32         | <b>1.12</b> ± 0.37 | <b>0.95</b> ± 0.18  | <b>0.95</b> ± 0.25 | <b>0.69</b> ± 0.02                     | 0.08                     | <b>0.81</b> ± 0.03 | <b>0.90</b> ± 0.07         | <b>0.85</b> ± 0.16 | <b>1.10</b> ± 0.10       | <b>0.68</b> ± 0.29 | <b>0.64</b> ± 0.05 |
| R10     | At3g17390  | S-adenosylmethionine synthase 4                                       | 862   | 42.8 / 40.0   | 5.5 / 5.6    | 0.24                      | <b>0.80</b> ± 0.09 | <b>1.18</b> ± 0.16         | <b>1.09</b> ± 0.21 | <b>0.95</b> ± 0.32  | <b>1.29</b> ± 0.21 | <b>2.08</b> ± 0.15                     | 0.24                     | <b>0.70</b> ± 0.25 | <b>0.73</b> ± 0.07         | <b>1.26</b> ± 0.37 | <b>0.75</b> ± 0.07       | <b>1.54</b> ± 0.26 | <b>1.25</b> ± 0.15 |
| R11     | At3g17820  | Glutamine synthetase cytosolic isozyme 1-3                            | 402   | 38.6 / 40.0   | 5.7 / 5.6    | 0.20                      | <b>0.87</b> ± 0.20 | <b>1.02</b> ± 0.22         | <b>1.41</b> ± 0.05 | <b>0.93</b> ± 0.15  | <b>1.43</b> ± 0.07 | <b>1.60</b> ± 0.00                     | 0.20                     | <b>0.76</b> ± 0.00 | <b>0.71</b> ± 0.10         | <b>1.08</b> ± 0.06 | <b>1.16</b> ± 0.05       | <b>1.29</b> ± 0.09 | <b>1.24</b> ± 0.09 |
| R12     | At1g79550  | Phosphoglycerate kinase                                               | 742   | 42.1 / 40.0   | 5.5 / 5.5    | 0.30                      | <b>0.90</b> ± 0.07 | <b>1.19</b> ± 0.06         | <b>1.14</b> ± 0.10 | <b>1.11</b> ± 0.05  | <b>1.32</b> ± 0.23 | <b>1.50</b> ± 0.06                     | 0.30                     | <b>0.76</b> ± 0.02 | <b>0.74</b> ± 0.07         | <b>0.90</b> ± 0.07 | <b>1.06</b> ± 0.02       | <b>1.11</b> ± 0.06 | <b>1.00</b> ± 0.07 |
| R13     | At2g44060  | Late embryogenesis abundant family protein                            | 557   | 35.9 / 40.0   | 4.7 / 4.7    | 0.13                      | <b>1.01</b> ± 0.06 | <b>1.43</b> ± 0.08         | <b>1.00</b> ± 0.14 | <b>1.07</b> ± 0.16  | <b>1.18</b> ± 0.08 | <b>1.31</b> ± 0.39                     | 0.15                     | <b>0.90</b> ± 0.08 | <b>0.67</b> ± 0.12         | <b>1.09</b> ± 0.17 | <b>0.97</b> ± 0.08       | <b>1.27</b> ± 0.07 | <b>1.17</b> ± 0.20 |
| R14     | At3g02230  | Reversibly glycosylated polypeptide-1                                 | 288   | 40.7 / 40.0   | 5.6 / 5.6    | 0.29                      | <b>0.84</b> ± 0.18 | <b>0.95</b> ± 0.20         | <b>1.37</b> ± 0.17 | <b>0.95</b> ± 0.10  | <b>1.26</b> ± 0.22 | <b>1.53</b> ± 0.06                     | 0.39                     | <b>0.82</b> ± 0.10 | <b>0.74</b> ± 0.04         | <b>1.05</b> ± 0.04 | <b>1.18</b> ± 0.04       | <b>1.09</b> ± 0.07 | <b>0.79</b> ± 0.07 |
| R15     | At2g01140  | Probable fructose-bisphosphate aldolase 3, chloroplastic              | 536   | 42.3 / 40.0   | 8.2 / 6.7    | 0.30                      | <b>1.05</b> ± 0.07 | <b>0.65</b> ± 0.11         | <b>0.93</b> ± 0.18 | <b>0.90</b> ± 0.14  | <b>0.79</b> ± 0.13 | <b>0.96</b> ± 0.16                     | 0.30                     | <b>1.04</b> ± 0.01 | <b>0.89</b> ± 0.07         | <b>0.81</b> ± 0.29 | <b>0.98</b> ± 0.08       | <b>1.17</b> ± 0.24 | <b>0.92</b> ± 0.06 |
| R16     | At1g35160  | 14-3-3-like protein GF14 phi                                          | 465   | 30.2 / 30.0   | 4.8 / 4.8    | 0.17                      | <b>0.91</b> ± 0.23 | <b>0.91</b> ± 0.18         | <b>0.76</b> ± 0.31 | <b>0.97</b> ± 0.03  | <b>1.14</b> ± 0.26 | <b>1.19</b> ± 0.22                     | 0.17                     | <b>0.66</b> ± 0.20 | <b>0.56</b> ± 0.20         | <b>0.92</b> ± 0.11 | <b>1.06</b> ± 0.15       | <b>1.10</b> ± 0.10 | <b>0.96</b> ± 0.27 |
| R17     | At1g70410  | Carbonic anhydrase, putative                                          | 415   | 30.8 / 25.0   | 6.7 / 6.9    | 0.22                      | <b>0.65</b> ± 0.05 | <b>0.69</b> ± 0.11         | <b>0.77</b> ± 0.21 | <b>1.24</b> ± 0.10  | <b>0.87</b> ± 0.26 | <b>0.74</b> ± 0.00                     | 0.20                     | <b>0.79</b> ± 0.23 | <b>0.71</b> ± 0.17         | <b>1.12</b> ± 0.24 | <b>1.38</b> ± 0.03       | <b>0.94</b> ± 0.16 | <b>0.84</b> ± 0.31 |
| R18     | At3g02780  | Isopentenyl-diphosphate Delta-isomerase II, chloroplastic             | 433   | 32.6 / 25.0   | 6.1 / 5.2    | 0.09                      | <b>1.32</b> ± 0.06 | <b>1.39</b> ± 0.12         | <b>1.19</b> ± 0.07 | <b>1.46</b> ± 0.11  | <b>0.89</b> ± 0.13 | <b>1.05</b> ± 0.04                     | 0.10                     | <b>1.54</b> ± 0.01 | <b>1.15</b> ± 0.05         | <b>0.92</b> ± 0.06 | <b>1.01</b> ± 0.22       | <b>1.15</b> ± 0.17 | <b>1.57</b> ± 0.14 |
| R19     | At3g55440  | Triosephosphate isomerase, cytosolic                                  | 428   | 27.2 / 25.0   | 5.4 / 5.4    | 0.15                      | <b>1.39</b> ± 0.05 | <b>1.48</b> ± 0.16         | <b>1.08</b> ± 0.13 | <b>1.46</b> ± 0.03  | <b>1.05</b> ± 0.25 | <b>0.97</b> ± 0.20                     | 0.15                     | <b>1.24</b> ± 0.22 | <b>1.47</b> ± 0.13         | <b>1.08</b> ± 0.07 | <b>1.11</b> ± 0.01       | <b>0.97</b> ± 0.06 | <b>0.87</b> ± 0.29 |
| R20     | At4g14630  | Germin-like protein subfamily 1 member 8                              | 314   | 23.6 / 24.0   | 6.3 / 5.9    | 0.20                      | <b>1.42</b> ± 0.29 | <b>1.42</b> ± 0.07         | <b>0.80</b> ± 0.16 | <b>0.73</b> ± 0.11  | <b>1.67</b> ± 0.56 | <b>1.15</b> ± 0.11                     | 0.30                     | <b>1.00</b> ± 0.06 | <b>0.98</b> ± 0.01         | <b>0.89</b> ± 0.17 | <b>0.64</b> ± 0.23       | <b>0.69</b> ± 0.06 | <b>0.66</b> ± 0.27 |
| R21     | At4g25100  | Superoxide dismutase [Fe], chloroplastic                              | 198   | 23.8 / 24.0   | 6.1 / 6.1    | 0.22                      | <b>1.45</b> ± 0.31 | <b>1.17</b> ± 0.32         | <b>1.32</b> ± 0.06 | <b>0.99</b> ± 0.23  | <b>0.82</b> ± 0.50 | <b>0.60</b> ± 0.07                     | 0.28                     | <b>0.80</b> ± 0.13 | <b>0.91</b> ± 0.14         | <b>0.83</b> ± 0.15 | <b>0.96</b> ± 0.27       | <b>0.67</b> ± 0.15 | <b>0.59</b> ± 0.40 |
| R22     | At2g21660  | Glycine-rich RNA-binding protein 7                                    | 549   | 16.9 / 18.0   | 5.9 / 5.5    | 0.47                      | <b>0.80</b> ± 0.18 | <b>0.70</b> ± 0.26         | <b>0.64</b> ± 0.20 | <b>0.53</b> ± 0.46  | <b>0.68</b> ± 0.01 | <b>0.69</b> ± 0.23                     | 0.47                     | <b>0.70</b> ± 0.02 | <b>0.69</b> ± 0.12         | <b>0.80</b> ± 0.10 | <b>0.71</b> ± 0.23       | <b>0.97</b> ± 0.17 | <b>0.72</b> ± 0.08 |
| R23     | At4g33720  | Pathogenesis-related protein, SCP family protein                      | 141   | 18.5 / 18.0   | 6.1 / 5.1    | 0.40                      | <b>1.10</b> ± 0.24 | <b>0.63</b> ± 0.16         | <b>1.24</b> ± 0.06 | <b>0.69</b> ± 0.14  | <b>0.84</b> ± 0.43 | <b>0.69</b> ± 0.14                     | 0.55                     | <b>1.01</b> ± 0.07 | <b>1.10</b> ± 0.18         | <b>0.73</b> ± 0.17 | <b>0.52</b> ± 0.47       | <b>1.12</b> ± 0.10 | <b>0.92</b> ± 0.26 |
| R24     | At2g05710  | Aconitate hydratase 2, mitochondrial                                  | 781   | 108.2 / 100.0 | 6.7 / 6.1    | 0.22                      | <b>1.13</b> ± 0.04 | <b>1.14</b> ± 0.11         | <b>0.96</b> ± 0.25 | <b>1.14</b> ± 0.06  | <b>0.90</b> ± 0.38 | <b>1.31</b> ± 0.04                     | 0.26                     | <b>1.30</b> ± 0.12 | <b>1.39</b> ± 0.07         | <b>1.03</b> ± 0.19 | <b>1.06</b> ± 0.08       | <b>0.50</b> ± 0.38 | <b>0.92</b> ± 0.24 |

|     |           |                                                                 |     |             |           |      |             |             |             |             |             |             |      |             |             |             |             |             |             |
|-----|-----------|-----------------------------------------------------------------|-----|-------------|-----------|------|-------------|-------------|-------------|-------------|-------------|-------------|------|-------------|-------------|-------------|-------------|-------------|-------------|
| R25 | At1g66280 | Beta-glucosidase 22                                             | 374 | 59.8 / 60.0 | 6.7 / 7.5 | 0.34 | 0.54 ± 0.63 | 0.55 ± 0.32 | 0.96 ± 0.24 | 0.87 ± 0.27 | 1.01 ± 0.00 | 0.86 ± 0.01 | 0.49 | 0.95 ± 0.25 | 0.84 ± 0.04 | 1.97 ± 0.50 | 1.62 ± 0.10 | 0.82 ± 0.02 | 0.81 ± 0.02 |
| R26 | At1g78850 | Curculin-like (mannose-binding) lectin family protein           | 345 | 49.1 / 50.0 | 7.8 / 7.8 | 0.32 | 0.64 ± 0.25 | 0.69 ± 0.15 | 0.94 ± 0.12 | 0.80 ± 0.15 | 0.76 ± 0.22 | 0.78 ± 0.02 | 0.29 | 0.73 ± 0.35 | 0.82 ± 0.05 | 1.07 ± 0.16 | 0.96 ± 0.14 | 0.77 ± 0.36 | 0.83 ± 0.08 |
| R27 | At5g46290 | 3-oxoacyl-[acyl-carrier-protein] synthase I, chloroplastic      | 501 | 50.4 / 40.0 | 8.3 / 6.8 | 0.12 | 1.02 ± 0.22 | 0.83 ± 0.01 | 0.74 ± 0.21 | 0.70 ± 0.09 | 0.94 ± 0.21 | 0.99 ± 0.17 | 0.12 | 1.03 ± 0.04 | 1.01 ± 0.05 | 0.69 ± 0.08 | 0.72 ± 0.15 | 1.30 ± 0.10 | 1.11 ± 0.09 |
| R28 | At4g11260 | Protein SGT1 homolog B                                          | 364 | 39.8 / 40.0 | 5.0 / 5.0 | 0.05 | 1.14 ± 0.03 | 1.29 ± 0.04 | 1.12 ± 0.09 | 1.60 ± 0.20 | 1.00 ± 0.12 | 0.77 ± 0.03 | 0.06 | 1.20 ± 0.20 | 1.14 ± 0.14 | 1.75 ± 0.33 | 1.56 ± 0.36 | 1.11 ± 0.21 | 1.26 ± 0.37 |
| R29 | At3g13235 | Ubiquitin family protein                                        | 458 | 45.4 / 40.0 | 4.8 / 4.9 | 0.08 | 1.09 ± 0.31 | 0.88 ± 0.22 | 0.70 ± 0.03 | 1.07 ± 0.12 | 0.98 ± 0.00 | 1.11 ± 0.09 | 0.10 | 1.14 ± 0.06 | 1.18 ± 0.02 | 0.98 ± 0.14 | 0.97 ± 0.09 | 1.29 ± 0.09 | 0.94 ± 0.14 |
| R30 | At1g77120 | Alcohol dehydrogenase class-P                                   | 692 | 41.2 / 40.0 | 5.8 / 6.0 | 0.13 | 1.39 ± 0.14 | 1.21 ± 0.16 | 1.13 ± 0.03 | 1.23 ± 0.16 | 0.90 ± 0.06 | 1.23 ± 0.07 | 0.20 | 1.18 ± 0.02 | 1.08 ± 0.08 | 1.23 ± 0.30 | 2.25 ± 0.42 | 1.17 ± 0.17 | 1.12 ± 0.12 |
| R31 | At4g39660 | Alanine--glyoxylate aminotransferase 2 homolog 1, mitochondrial | 633 | 52.0 / 40.0 | 7.7 / 7.3 | 0.11 | 0.88 ± 0.17 | 0.98 ± 0.11 | 0.77 ± 0.01 | 0.61 ± 0.08 | 1.03 ± 0.20 | 1.03 ± 0.23 | 0.11 | 0.78 ± 0.25 | 0.95 ± 0.15 | 0.76 ± 0.20 | 0.75 ± 0.06 | 1.00 ± 0.30 | 1.00 ± 0.30 |
| R32 | At5g38940 | Germin-like protein subfamily 1 member 11                       | 406 | 23.7 / 24.0 | 8.6 / 8.6 | 0.65 | 1.13 ± 0.13 | 0.80 ± 0.04 | 1.15 ± 0.08 | 0.88 ± 0.13 | 0.93 ± 0.09 | 0.60 ± 0.14 | 0.68 | 1.00 ± 0.03 | 0.89 ± 0.16 | 1.21 ± 0.06 | 0.99 ± 0.06 | 0.90 ± 0.00 | 0.75 ± 0.24 |
| R33 | At1g09780 | 2,3-bisphosphoglycerate-independent phosphoglycerate mutase 1   | 849 | 60.6 / 65.0 | 5.3 / 5.4 | 0.22 | 1.11 ± 0.00 | 1.16 ± 0.03 | 0.88 ± 0.03 | 0.99 ± 0.00 | 1.09 ± 0.29 | 1.56 ± 0.08 | 0.22 | 0.86 ± 0.10 | 0.82 ± 0.02 | 0.83 ± 0.06 | 0.88 ± 0.02 | 0.86 ± 0.03 | 1.59 ± 0.19 |
| R34 | N/A       | <b>Not identified</b>                                           | N/A | N/A / 60.0  | N/A / 5.6 | 0.15 | 0.83 ± 0.37 | 0.97 ± 0.22 | 1.13 ± 0.07 | 0.91 ± 0.06 | 1.16 ± 0.26 | 1.49 ± 0.10 | 0.16 | 1.06 ± 0.05 | 1.15 ± 0.12 | 0.96 ± 0.24 | 0.93 ± 0.22 | 1.57 ± 0.04 | 1.63 ± 0.04 |
| R35 | At4g34200 | Phosphoglycerate dehydrogenase-like protein                     | 168 | 63.3 / 60.0 | 6.2 / 5.9 | 0.35 | 1.05 ± 0.04 | 1.04 ± 0.05 | 0.86 ± 0.24 | 1.07 ± 0.19 | 1.27 ± 0.17 | 1.99 ± 0.23 | 0.35 | 0.92 ± 0.30 | 0.77 ± 0.19 | 0.91 ± 0.16 | 0.97 ± 0.22 | 1.31 ± 0.08 | 1.40 ± 0.20 |
| R35 | At3g58610 | Ketol-acid reductoisomerase, chloroplastic                      | 330 | 63.8 / 60.0 | 6.4 / 5.9 | 0.35 | 1.05 ± 0.04 | 1.04 ± 0.05 | 0.86 ± 0.24 | 1.07 ± 0.19 | 1.27 ± 0.17 | 1.99 ± 0.23 | 0.35 | 0.92 ± 0.30 | 0.77 ± 0.19 | 0.91 ± 0.16 | 0.97 ± 0.22 | 1.31 ± 0.08 | 1.40 ± 0.20 |
| R36 | At4g13940 | Adenosylhomocysteinase 1                                        | 595 | 53.4 / 50.0 | 5.7 / 5.8 | 0.60 | 1.14 ± 0.22 | 1.29 ± 0.18 | 1.12 ± 0.07 | 1.01 ± 0.04 | 1.25 ± 0.32 | 1.64 ± 0.06 | 0.59 | 0.92 ± 0.10 | 0.87 ± 0.09 | 1.24 ± 0.08 | 1.23 ± 0.06 | 1.59 ± 0.40 | 1.36 ± 0.02 |

**Table S6.** Number of HS-regulated proteins associated with specific biological functions in wild-type (Col-0) and transformant (ipt). Assignment according to databases Uniprot and TAIR.

| Number of regulated proteins |         |            |          |             |         | Description - Biological function (TAIR)             |
|------------------------------|---------|------------|----------|-------------|---------|------------------------------------------------------|
| S (Col-0)                    | S (ipt) | SR (Col-0) | SR (ipt) | R (Col-0-0) | R (ipt) |                                                      |
| 37                           | 36      | 45         | 45       | 36          | 36      | response to stimulus                                 |
| 26                           | 26      | 30         | 26       | 28          | 28      | metabolic process                                    |
| 26                           | 25      | 32         | 34       | 27          | 27      | response to chemical stimulus                        |
| 25                           | 24      | 30         | 28       | 28          | 28      | cellular process                                     |
| 25                           | 23      | 32         | 31       | 22          | 22      | response to stress                                   |
| 22                           | 21      | 27         | 30       | 23          | 23      | response to inorganic substance                      |
| 20                           | 21      | 27         | 23       | 22          | 22      | cellular metabolic process                           |
| 20                           | 21      | 27         | 29       | 22          | 22      | response to metal ion                                |
| 18                           | 20      | 24         | 26       | 21          | 21      | response to cadmium ion                              |
| 16                           | 14      | 25         | 22       | 18          | 18      | response to abiotic stimulus                         |
| 12                           | 11      | 15         | 15       | 10          | 10      | defense response                                     |
| 12                           | 11      | 14         | 13       | 9           | 9       | multi-organism process                               |
| 11                           | 11      | 14         | 13       | 8           | 8       | response to biotic stimulus                          |
| 11                           | 11      | 14         | 13       | 8           | 8       | response to other organism                           |
| 10                           | 8       | 11         | 8        | 10          | 10      | cellular nitrogen compound metabolic process         |
| 10                           | 8       | 11         | X        | 10          | 10      | nitrogen compound metabolic process                  |
| 10                           | 10      | 11         | 10       | 7           | 7       | response to bacterium                                |
| 9                            | 10      | 9          | 9        | 7           | 7       | defense response to bacterium                        |
| 8                            | 5       | 11         | 9        | 9           | 9       | response to cold                                     |
| 8                            | 5       | 8          | 8        | 6           | 6       | response to endogenous stimulus                      |
| 8                            | 5       | 8          | 8        | 6           | 6       | response to hormone stimulus                         |
| 8                            | X       | 8          | 8        | X           | X       | response to organic substance                        |
| 8                            | 8       | 14         | 10       | 10          | 10      | response to osmotic stress                           |
| 8                            | 8       | 14         | 10       | 10          | 10      | response to salt stress                              |
| 8                            | 5       | 13         | 11       | 9           | 9       | response to temperature stimulus                     |
| 8                            | 8       | 10         | X        | 11          | 11      | small molecule metabolic process                     |
| 7                            | 5       | 6          | 8        | X           | X       | cellular response to stimulus                        |
| 7                            | 5       | 8          | 7        | 6           | 6       | response to abscisic acid stimulus                   |
| 6                            | 9       | 10         | 9        | 7           | 7       | catabolic process                                    |
| 6                            | 3       | 6          | 8        | X           | X       | response to oxidative stress                         |
| 5                            | 5       | 6          | 5        | 5           | 5       | carboxylic acid metabolic process                    |
| 5                            | 5       | 6          | 5        | 5           | 5       | cellular ketone metabolic process                    |
| 5                            | 4       | 4          | 7        | X           | X       | cellular response to chemical stimulus               |
| 5                            | 5       | 6          | 5        | 5           | 5       | organic acid metabolic process                       |
| 5                            | 5       | 6          | 5        | 5           | 5       | oxoacid metabolic process                            |
| 5                            | 5       | 6          | 5        | 5           | 5       | sulfur metabolic process                             |
| 4                            | 4       | 6          | 5        | 4           | 4       | amine metabolic process                              |
| 4                            | 4       | 6          | 5        | 4           | 4       | cellular amine metabolic process                     |
| 4                            | 4       | 6          | 5        | 4           | 4       | cellular amino acid and derivative metabolic process |
| 4                            | 4       | 6          | 5        | 4           | 4       | cellular amino acid metabolic process                |

|   |   |   |   |   |   |                                                      |
|---|---|---|---|---|---|------------------------------------------------------|
| 4 | 5 | 7 | 7 | X | X | cellular catabolic process                           |
| 4 | X | 5 | X | 4 | 4 | cellular nitrogen compound biosynthetic process      |
| 4 | X | 4 | 5 | X | X | cellular response to stress                          |
| 4 | X | 5 | 5 | X | X | immune response                                      |
| 4 | X | 5 | 5 | X | X | immune system process                                |
| 4 | X | 5 | 5 | 3 | 3 | innate immune response                               |
| 4 | X | 4 | 4 | X | X | response to light stimulus                           |
| 4 | X | 4 | 4 | X | X | response to radiation                                |
| 4 | 4 | 7 | 6 | 5 | 5 | response to zinc ion                                 |
| 4 | 6 | 5 | 4 | 6 | 6 | small molecule catabolic process                     |
| 3 | 6 | 4 | 4 | 5 | 5 | carbohydrate catabolic process                       |
| 3 | 6 | 4 | 4 | 5 | 5 | cellular carbohydrate catabolic process              |
| 3 | X | X | X | X | X | cellular response to endogenous stimulus             |
| 3 | X | X | 3 | X | X | cellular response to hormone stimulus                |
| 3 | 2 | 2 | 3 | X | X | circadian rhythm                                     |
| 3 | 3 | X | X | 4 | 4 | cofactor metabolic process                           |
| 3 | X | 2 | 2 | 3 | 3 | regulation of stomatal movement                      |
| 3 | 2 | 3 | 5 | X | X | response to reactive oxygen species                  |
| 3 | 2 | 2 | 3 | X | X | rhythmic process                                     |
| 3 | 2 | 3 | 3 | 2 | 2 | serine family amino acid metabolic process           |
| 3 | 2 | 4 | 3 | 3 | 3 | sulfur compound biosynthetic process                 |
| 2 | 4 | 3 | 3 | 2 | 2 | amine catabolic process                              |
| 2 | X | X | X | 1 | 1 | carbon utilization                                   |
| 2 | 2 | 2 | 2 | 2 | 2 | carboxylic acid catabolic process                    |
| 2 | 2 | 2 | 2 | 2 | 2 | cellular amino acid catabolic process                |
| 2 | 2 | 2 | 2 | 2 | 2 | cellular response to abscisic acid stimulus          |
| 2 | 2 | 2 | 3 | X | X | cellular response to oxidative stress                |
| 2 | 2 | 1 | 2 | X | X | cellular response to oxygen radical                  |
| 2 | 2 | 2 | 3 | X | X | cellular response to reactive oxygen species         |
| 2 | 2 | 1 | 2 | X | X | cellular response to superoxide                      |
| 2 | 1 | 2 | 2 | X | X | cysteine biosynthetic process                        |
| 2 | 1 | 2 | 2 | X | X | cysteine metabolic process                           |
| 2 | X | X | X | X | X | defense response to fungus, incompatible interaction |
| 2 | 4 | 3 | 2 | 4 | 4 | alcohol catabolic process                            |
| 2 | 4 | 2 | X | 4 | 4 | glucose catabolic process                            |
| 2 | 4 | 3 | 2 | 4 | 4 | glucose metabolic process                            |
| 2 | 4 | 3 | 2 | 4 | 4 | hexose catabolic process                             |
| 2 | 4 | 3 | X | 5 | 5 | hexose metabolic process                             |
| 2 | 2 | X | X | X | X | chloroplast organization                             |
| 2 | 4 | 3 | 2 | 4 | 4 | monosaccharide catabolic process                     |
| 2 | 3 | X | X | 3 | 3 | NADP metabolic process                               |
| 2 | 3 | X | X | 3 | 3 | nicotinamide nucleotide metabolic process            |
| 2 | 2 | 2 | 2 | 2 | 2 | organic acid catabolic process                       |
| 2 | 3 | X | X | 3 | 3 | oxidoreduction coenzyme metabolic process            |
| 2 | 2 | 2 | 3 | X | X | oxygen and reactive oxygen species metabolic process |
| 2 | 3 | X | X | 3 | 3 | pyridine nucleotide metabolic process                |



|   |   |   |   |   |   |                                                     |
|---|---|---|---|---|---|-----------------------------------------------------|
| 2 | 2 | 1 | 2 | X | X | removal of superoxide radicals                      |
| 2 | 2 | X | 2 | X | X | response to copper ion                              |
| 2 | 2 | 1 | 2 | X | X | response to oxygen radical                          |
| 2 | 2 | 1 | 2 | X | X | response to superoxide                              |
| 2 | 1 | 2 | 2 | X | X | serine family amino acid biosynthetic process       |
| 2 | 2 | 3 | 3 | 2 | 2 | sulfur amino acid biosynthetic process              |
| 2 | 2 | 3 | 3 | 2 | 2 | sulfur amino acid metabolic process                 |
| 2 | 2 | 1 | 2 | X | X | superoxide metabolic process                        |
| 1 | 1 | 1 | 1 | X | X | cysteine biosynthetic process from serine           |
| 1 | 1 | 1 | 1 | 1 | 1 | glycine decarboxylation via glycine cleavage system |
| 1 | X | X | X | X | X | isocitrate metabolic process                        |
| 1 | X | 1 | 1 | 1 | 1 | mRNA export from nucleus                            |
| 1 | X | 1 | 1 | 1 | 1 | mRNA transport                                      |
| 1 | X | 1 | X | 1 | 1 | oxazole or thiazole biosynthetic process            |
| 1 | X | 1 | X | 1 | 1 | oxazole or thiazole metabolic process               |
| 1 | 1 | 1 | 1 | 1 | 1 | proline catabolic process                           |
| 1 | 1 | 1 | 1 | 1 | 1 | proline catabolic process to glutamate              |
| 1 | 1 | 1 | 1 | 1 | 1 | proline metabolic process                           |
| 1 | X | X | X | 1 | 1 | response to carbon dioxide                          |
| 1 | X | 1 | X | X | X | response to mannitol stimulus                       |
| 1 | X | 3 | 1 | 1 | 1 | RNA secondary structure unwinding                   |
| 1 | 1 | 1 | X | 1 | 1 | sulfate reduction                                   |
| 1 | X | 1 | X | 1 | 1 | thiamin and derivative biosynthetic process         |
| 1 | X | 1 | X | 1 | 1 | thiamin and derivative metabolic process            |
| 1 | X | 1 | X | 1 | 1 | thiamin biosynthetic process                        |
| 1 | X | 1 | X | 1 | 1 | thiamin metabolic process                           |
| X | X | X | X | 5 | 5 | alcohol metabolic process                           |
| X | X | 4 | X | X | X | amine biosynthetic process                          |
| X | X | 2 | 2 | X |   | calcium ion homeostasis                             |
| X | 7 | X | X | 7 | 7 | carbohydrate metabolic process                      |
| X | 2 | 2 | 2 | 2 | 2 | carbon fixation                                     |
| X | X | 4 | X | X | X | carboxylic acid biosynthetic process                |
| X | X | 2 | 2 | X | X | cation homeostasis                                  |
| X | X | X | X | 2 | 2 | cell tip growth                                     |
| X | 2 | 4 | 3 | X | X | cellular amino acid biosynthetic process            |
| X | 7 | 5 | 5 | 7 | 7 | cellular carbohydrate metabolic process             |
| X | X | 2 | 2 | X | X | cellular glucan metabolic process                   |
| X | X | X | X | 2 | 2 | cellular metabolic compound salvage                 |
| X | X | 2 | 2 | X | X | cellular polysaccharide biosynthetic process        |
| X | X | 1 | 1 | X | X | cellular response to hydrogen peroxide              |
| X | X | 1 | 1 | X | X | cellular response to nitrogen starvation            |
| X | 3 | X | X | 3 | 3 | coenzyme metabolic process                          |
| X | X | X | X | 2 | 2 | developmental cell growth                           |
| X | 1 | X | X | X | X | defense response to insect                          |
| X | X | X | 2 | X | X | detection of abiotic stimulus                       |
| X | X | X | 2 | X | X | detection of external stimulus                      |

|   |   |   |   |   |   |                                                         |
|---|---|---|---|---|---|---------------------------------------------------------|
| X | X | 1 | 1 | X | X | detection of gravity                                    |
| X | X | X | 2 | X | X | detection of stimulus                                   |
| X | X | 2 | 2 | X | X | di-, tri-valent inorganic cation homeostasis            |
| X | X | 2 | 2 | X | X | disaccharide biosynthetic process                       |
| X | X | 2 | 2 | 2 | 2 | disaccharide metabolic process                          |
| X | X | X | X | 2 | 2 | electron transport chain                                |
| X | X | X | X | 4 | 4 | embryonic development                                   |
| X | X | X | X | 1 | 1 | fructose 1,6-bisphosphate metabolic process             |
| X | X | X | X | 1 | 1 | fructose metabolic process                              |
| X | X | 1 | 1 | X | X | galactose catabolic process                             |
| X | 3 | 4 | X | 5 | 5 | generation of precursor metabolites and energy          |
| X | X | 2 | 2 | X | X | glucan biosynthetic process                             |
| X | X | 2 | 2 | X | X | glucan metabolic process                                |
| X | X | 1 | 1 | X | X | glucose 1-phosphate metabolic process                   |
| X | 2 | X | 2 | X | X | glucosinolate catabolic process                         |
| X | 2 | X | 2 | X | X | glucosinolate metabolic process                         |
| X | 1 | X | X | X | X | glutamate metabolic process                             |
| X | 1 | X | X | X | X | glutamine family amino acid catabolic process           |
| X | 1 | X | X | X | X | glycine catabolic process                               |
| X | X | X | X | 2 | 2 | glycolysis                                              |
| X | X | 2 | 2 | X | X | glycoside biosynthetic process                          |
| X | 2 | X | 2 | X | X | glycoside catabolic process                             |
| X | 3 | 3 | 4 | 3 | 3 | glycoside metabolic process                             |
| X | 2 | X | 2 |   | X | glycosinolate catabolic process                         |
| X | 2 | X | 2 |   | X | glycosinolate metabolic process                         |
| X | X | X | 3 | X | X | homeostatic process                                     |
| X | X | 1 | 1 | X | X | hydrogen peroxide catabolic process                     |
| X | X | 1 | 1 | X | X | hydrogen peroxide metabolic process                     |
| X | X | X | 3 | X | X | chemical homeostasis                                    |
| X | X | 2 | 2 | X | X | ion homeostasis                                         |
| X | 1 | X | X | X | X | L-serine metabolic process                              |
| X | 1 | X | X | X | X | malate metabolic process                                |
| X | X | 2 | 2 | X | X | metal ion homeostasis                                   |
| X | 4 | 3 | X | 5 | 5 | monosaccharide metabolic process                        |
| X | 3 | X | X | 2 | 2 | NADPH regeneration                                      |
| X | X | X | X | 1 | 1 | negative regulation of photosynthesis, light reaction   |
| X | 3 | X | X | 3 | 3 | nucleobase, nucleoside and nucleotide metabolic process |
| X | 3 | X | X | 3 | 3 | nucleoside phosphate metabolic process                  |
| X | 3 | X | X | 3 | 3 | nucleotide metabolic process                            |
| X | X | 2 | 2 | X | X | oligosaccharide biosynthetic process                    |
| X | X | 2 | 2 | 2 | 2 | oligosaccharide metabolic process                       |
| X | X | 4 | X | X | X | organic acid biosynthetic process                       |
| X | 2 | 2 | 2 | 2 | 2 | organic substance metabolic process                     |
| X | 4 | X | X | X | X | oxidation reduction                                     |
| X | 3 | X | X | 2 | 2 | pentose-phosphate shunt                                 |
| X | 1 | X | X | X | X | pentose-phosphate shunt, oxidative branch               |

|   |   |   |   |   |   |                                                    |
|---|---|---|---|---|---|----------------------------------------------------|
| X | X | X | X | 1 | 1 | photoinhibition                                    |
| X | X | X | X | 2 | 2 | photorespiration                                   |
| X | 3 | 3 | 3 | 4 | 4 | photosynthesis                                     |
| X | 1 | 1 | 1 | 1 | 1 | photosynthesis, dark reaction                      |
| X | 2 | 2 | 2 | 3 | 3 | photosynthesis, light reaction                     |
| X | X | X | X | 2 | 2 | photosynthetic electron transport chain            |
| X | X | X | X | 1 | 1 | photosystem II stabilization                       |
| X | X | X | X | 2 | 2 | pollen tube development                            |
| X | X | X | X | 2 | 2 | pollen tube growth                                 |
| X | 2 |   | X | X | X | plastid organization                               |
| X | X | 2 | 2 | X | X | polysaccharide biosynthetic process                |
| X | X | X | 6 | X | X | post-embryonic development                         |
| X | X | 3 | X | X | X | protein folding                                    |
| X | 1 | X | X | X | X | protein homooligomerization                        |
| X | 1 | 1 | 1 | 1 | 1 | reductive pentose-phosphate cycle                  |
| X | X | X | X | 2 | 2 | regulation of cellular protein metabolic process   |
| X | X | X | X | 1 | 1 | regulation of dephosphorylation                    |
| X | X | X | 1 | 1 | 1 | regulation of multicellular organism growth        |
| X | X | X | X | 1 | 1 | regulation of protein amino acid dephosphorylation |
| X | X | X | X | 2 | 2 | regulation of protein metabolic process            |
| X | X | X | X | 1 | 1 | regulation of protein modification process         |
| X | 1 | X | X | X | X | response to endoplasmic reticulum stress           |
| X | X | X | 4 | X | X | response to external stimulus                      |
| X | X | 2 | 3 | X | X | response to hydrogen peroxide                      |
| X | 2 | X | 2 | X | X | response to insect                                 |
| X | X | 2 | X | X | X | response to light intensity                        |
| X | X | 3 | X | X | X | ribosome biogenesis                                |
| X | 3 | X | 4 | X | X | secondary metabolic process                        |
| X | 2 | 5 | 2 | X | X | S-glycoside catabolic process                      |
| X | 2 | X | 2 | X | X | S-glycoside metabolic process                      |
| X | 1 | 2 | 2 | X | X | starch biosynthetic process                        |
| X | X | 2 | 2 | X | X | starch metabolic process                           |
| X | 1 | X | X | 2 | X | sucrose biosynthetic process                       |
| X | X | X | X | X | 2 | sucrose metabolic process                          |
| X | 2 | X | 2 | X | X | sulfur compound catabolic process                  |
| X | X | 2 | 2 | X | X | toxin catabolic process                            |
| X | X | 2 | 2 | X | X | toxin metabolic process                            |
| X | X | X | X | 2 | 2 | tube development                                   |

**Figure S1.** Content of cytokinin metabolites in leaves (A, C, E, G) and roots (B, D, F, H) of wild-type (Col-0) and activated transgenic plants (*ipt*) (pmol/g FW). The CK O-glucosides (tZOG – *trans*-zeatin O-glucoside, tZROG - *trans*-zeatin riboside O-glucoside), CK phosphates (tZRMP - *trans*-zeatin riboside phosphate, iPRMP – isopentenyladenosine phosphate, DZRMP – dihydrozeatin riboside phosphate), *cis*-zeatin O-glucosides (*cis*-zeatin (riboside) O-glucoside), CK N-glucosides (7N- and 9N-glucosides of *trans*-zeatin, isopentenyladenine and dihydrozeatin).

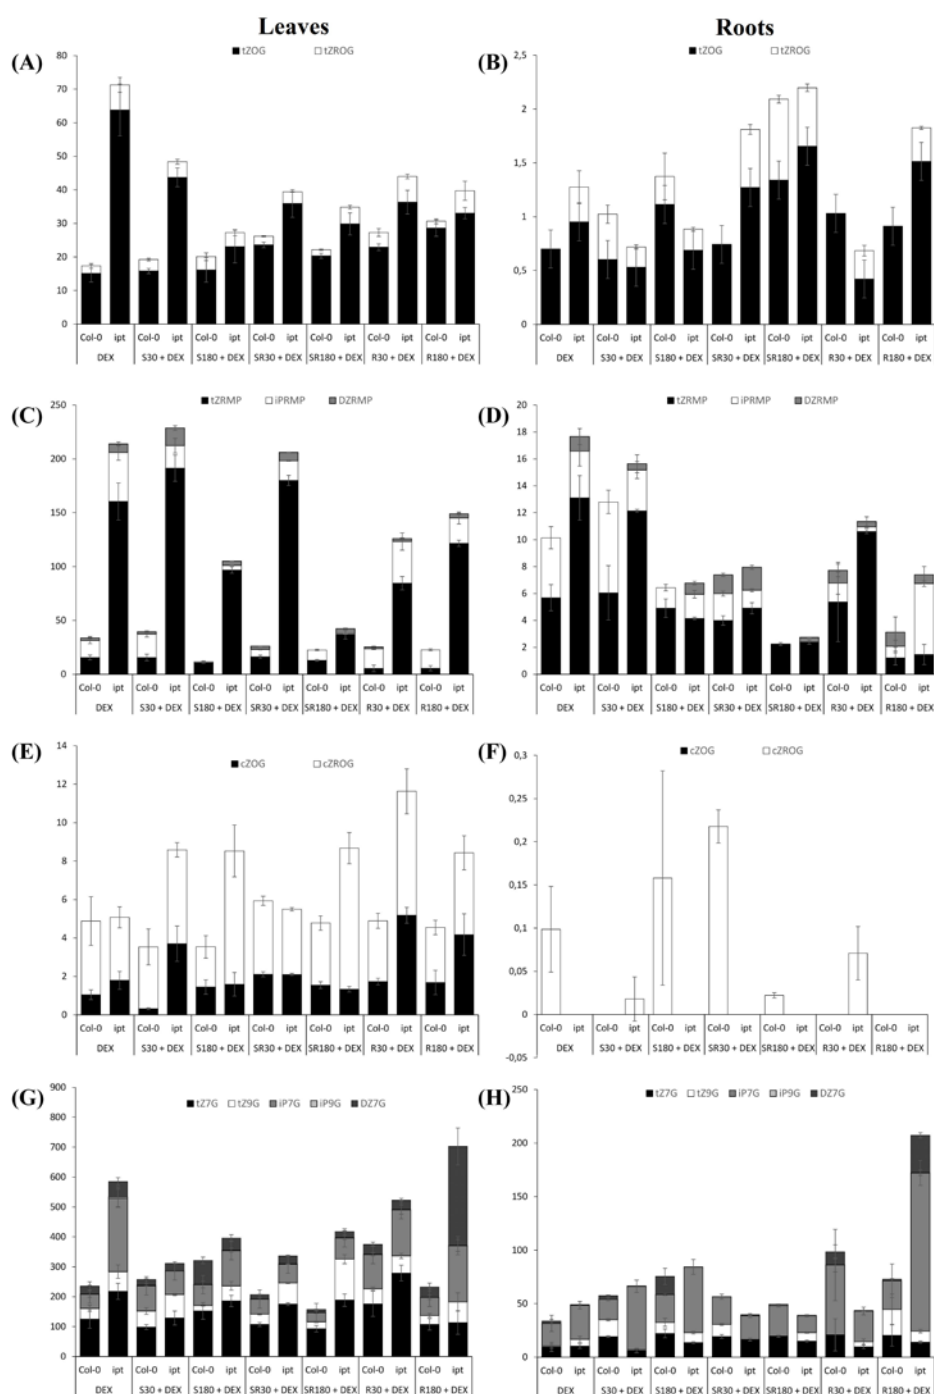

**Figure S2.** Stomatal conductance ( $g_s$ ) in wild-type and *ipt* over-expressing transgenic tobacco leaves during heat stress. The  $g_s$  was measured at fully expanded leaves in a closed cabinet at 40°C at PAR 300  $\mu\text{mol m}^{-2} \text{s}^{-1}$ . Three plants of each genotype were followed.

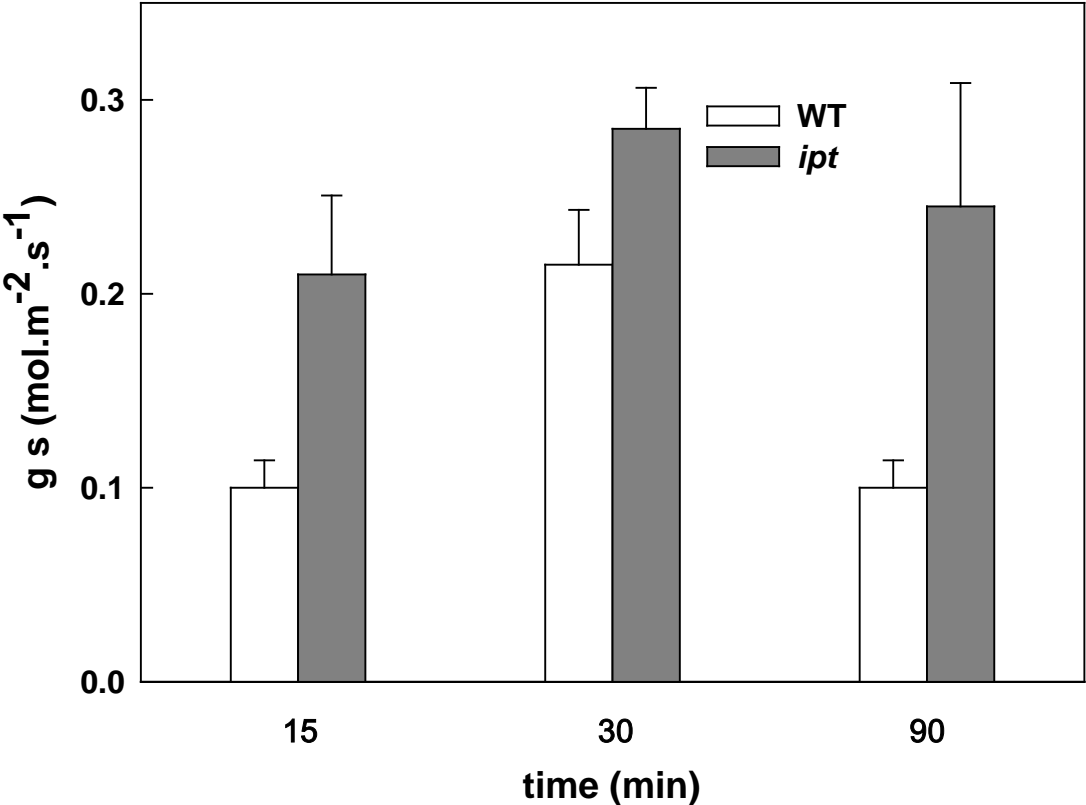

**Figure S3.** Representative two-dimensional gels showing protein resolution in the leaves (A) and roots (B). Differentially regulated protein spots are indicated and their numbers correspond with the lists of proteins (e.g., Supplementary Table S2). Isoelectric points (pI) and mobility of molecular mass (kDa) markers are marked. Decodon Delta 2D was used to compensate for the PAGE background and thus to optimize the visibility of all differentially regulated protein spots.

**(A)**

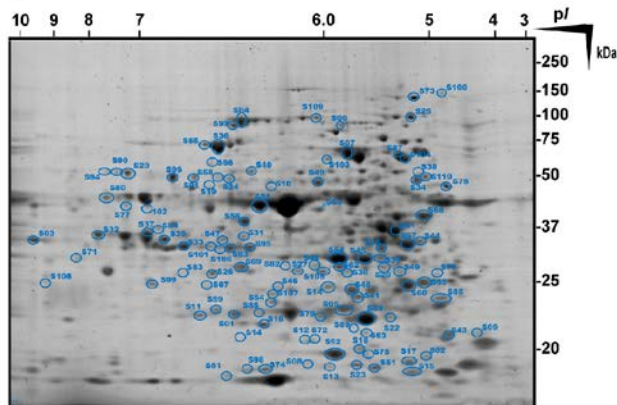

**(B)**

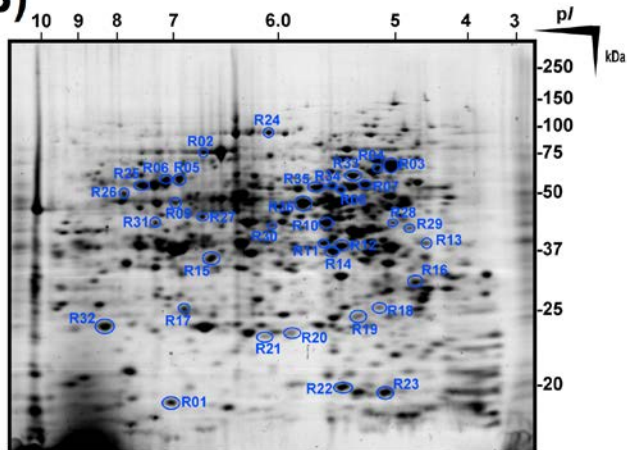

**Figure S4.** Subcellular localization of proteins regulated after exposition to specific HS treatments in wild-type (Col-0) (A) and transgenic plants (*ipt*) (B). Percentage diagrams show distribution of leaf proteins (diagrams above) and root proteins (diagrams below), respectively. The subcellular location of each identified protein was determined according to the TAIR database (<http://www.arabidopsis.org/>) and MASC P GATOR (<http://gator.masc-proteomics.org/>; Joshi et al., 2011).

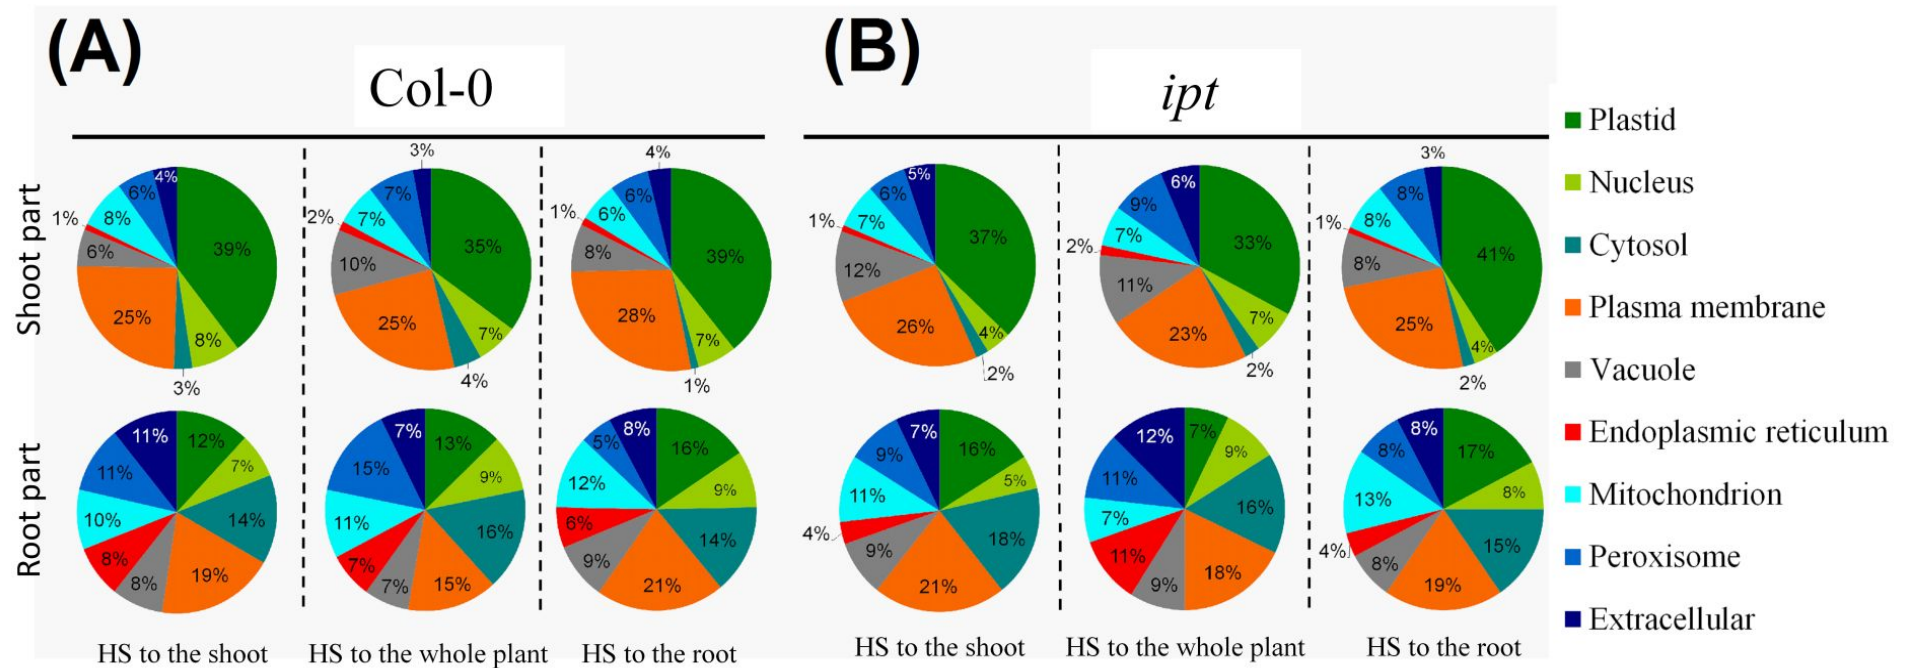

**Figure S5.** The heat-map of proteins regulated in the leaves and their functional assignment to temperature-stimulus response and stomatal-movement regulation (A) acquired from UNIPROT (<http://www.uniprot.org/>) and TAIR (<http://www.arabidopsis.org/>) database. The protein-protein interaction network designed by STRING database (B; [www.string-db.org](http://www.string-db.org)) demonstrates tight connection between the above mentioned biological processes. Significant comparison of protein spot volumes was based on the T-test  $P < 0.05$ , when significant relative spot volume change was made by comparison of WT 40°C/WT 21°C (for WT) and DEX 40°C ipt/40°C WT (for transgen).

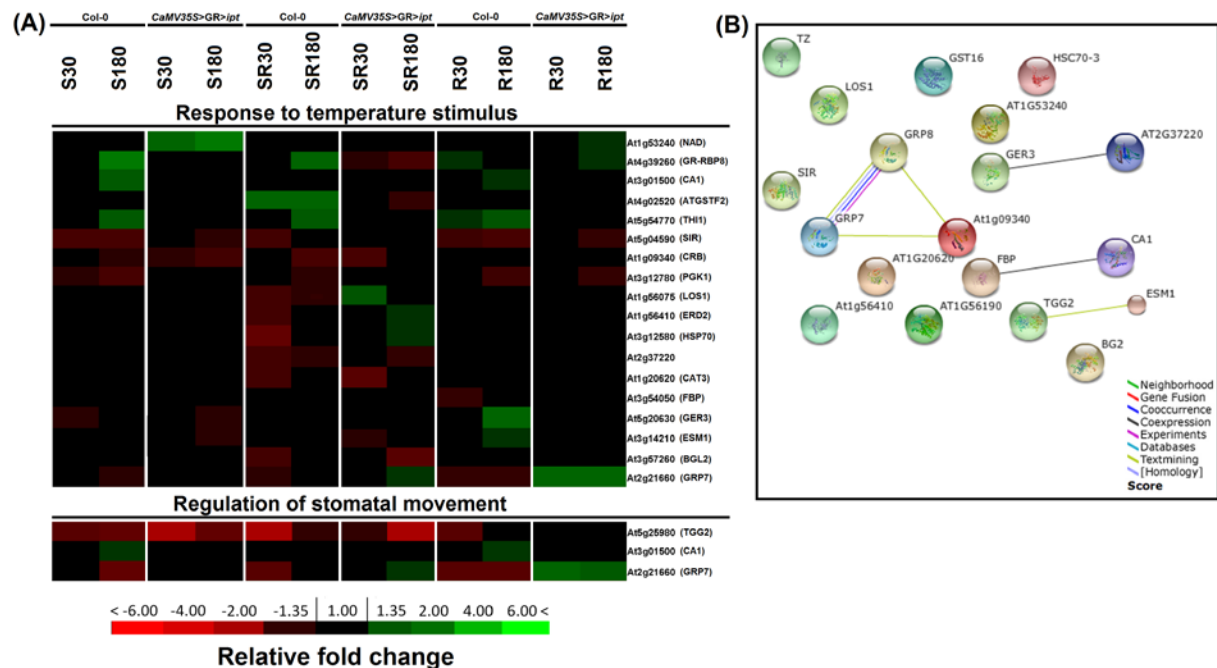

Supplement: supp_erw129_supplementary_tables_S1_S6_Figures_S1_S5.pdf [file supp_erw129_supplementary_tables_S1_S6_Figures_S1_S5.pdf]
